# Supplementary material
Source: publisher site journal article supplement (https://www.spandidos-publications.com/8253/downloadSupplementary)
Supplement: Supplementary file 1 [file downloadSupplementary]

Table SI. List of antibodies.

| Antibody         | Supplier                                       | Cat. no.   | Dilution                     |
|------------------|------------------------------------------------|------------|------------------------------|
| DAZAP1           | Santa Cruz<br>Biotechnology, Inc.              | sc-373987  | WB: 1:100<br>IHC: 1:200      |
| NOTCH1           | Proteintech Group,<br>Inc.                     | 10062-2-AP | WB: 1:4,000<br>IHC: 1:200    |
| JAG1             | Wuhan Boster<br>Biological<br>Technology, Ltd. | MA00640    | WB: 1:2,000<br>IHC: 1:150    |
| HES1             | ABclonal Biotech<br>Co., Ltd.                  | A0925      | WB: 1:2,000                  |
| E-cadherin       | Proteintech Group,<br>Inc.                     | 20874-1-AP | WB: 1:20,000<br>IHC: 1:5,000 |
| N-cadherin       | Proteintech Group,<br>Inc.                     | 22018-1-AP | WB: 1:2,000                  |
| Vimentin         | Cell Signaling<br>Technology, Inc.             | D21H3      | WB: 1:1,000<br>IHC: 1:400    |
| $\beta$ -tubulin | Proteintech Group,                             | 10094-1-AP | WB: 1:5,000                  |

|      |                            |            |             |
|------|----------------------------|------------|-------------|
|      | Inc.                       |            |             |
| Flag | Proteintech Group,<br>Inc. | 66008-4-Ig | WB: 1:2,000 |

DAZAP, deleted in azoospermia-associated protein; JAG, jagged; HES, hairy and enhancer of split; WB, western blotting; IHC, immunohistochemistry.

Table SII. siRNAs and shRNAs for transient transfection

| Name           |        | Sequence, 5'→3'                                                  |
|----------------|--------|------------------------------------------------------------------|
| DAZAP1         | siRNA1 | Forward: GAUAAUUUGUCGGUGGAAUUTT<br>Reverse: AAUUCCACCGACAAAUAUC  |
|                | siRNA2 | Forward: GGAGGUAGUCAUGAUCUAUTT<br>Reverse: AUAGAUC AUGACUACCUCC  |
| NOTCH1         | siRNA1 | Forward: AUUGAUCUUGUCCAGGCAGCG<br>Reverse: CGCUGCCUGGACAAGAUCAUU |
|                | siRNA2 | Forward: UAGCCACUGGUCAUGUCUUUG<br>Reverse: CAAAGACAUGACCAGUGGCUA |
| JAG1           | siRNA1 | Forward: UUCAUUUGCAUCUAACUGG<br>Reverse: UAGCCACUGGUCAUGUCUUUG   |
|                | siRNA2 | Forward: UUGUCCUGUUUGUUUGUCC<br>Reverse: GGACAAACAAACAGGACAA     |
| Scramble siRNA |        | Forward: UUCUCCGAACGUGUCACGUTT<br>Reverse: ACGUGACACGUUCGGAGAA   |
| DAZAP1 shRNA   |        | Forward: GGAGGTAGTCATGATCTAT                                     |

|                |                                                                  |
|----------------|------------------------------------------------------------------|
|                | Reverse: AUAGAUCAUGACUACCUCC                                     |
| NOTCH1 shRNA   | Forward: CGCTGCCTGGACAAGATCAAT<br>Reverse: ATTGATCTTGTCCAGGCAGCG |
| Scramble shRNA | Forward: TTCTCCGAACGTGTCACGT<br>Reverse: CGTGACACGTTCGGAGAA      |

si, small interfering; sh, short hairpin; DAZAP, deleted in azoospermia-associated protein; JAG, jagged.

Table SIII. Primers used for quantitative PCR.

| Name   | Direction | Sequence, 5'→3'        |
|--------|-----------|------------------------|
| DAZAP1 | F         | AGAAGTTCGGAGTGGTCACG   |
|        | R         | ACTGATTGTTCGTCCTCGAAAG |
| NOTCH1 | F         | GAGGCGTGGCAGACTATGC    |
|        | R         | CTTGTACTCCGTCAGCGTGA   |
| JAG1   | F         | GTCCATGCAGAACGTGAACG   |
|        | R         | GCGGGACTGATACTCCTTGA   |
| GAPDH  | F         | AAATCCCATCACCATCTTCC   |
|        | R         | TCACACCCATGACGAACA     |

DAZAP, deleted in azoospermia-associated protein; JAG, jagged 1; F, forward; R, reverse.

Table SIV. List of probe sequences for *in situ* hybridization.

| Gene     | Probe no. | Sequence, 5'→3'                                                 |
|----------|-----------|-----------------------------------------------------------------|
| NOTCH1   | 1         | Forward: CCCGTGGCACCCAGAACTGC<br>Reverse: GTGCAGCGCGTCAATGACTT  |
|          | 2         | Forward: TCAACGGGCTCTTGTGCCACA<br>Reverse: TCCTGGACTACAGCTTCGG  |
|          | 3         | Forward: ACCCCTGGAAGAACTGCACG<br>Reverse: CAGTCTCTGCAGTGCTGGAA  |
| Jagged 1 | 1         | Forward: ACTTTGAGTATCAGATCCGC<br>Reverse: GTGACCTGTG ATGACTACTA |
|          | 2         | Forward: TCCCCATCCTGGACGACCAG<br>Reverse: TGCTTCGTCCACCCCTGCAC  |
|          | 3         | Forward: ACTCCTATTACCAGGATAACTG<br>Reverse: TGCGAACATCACATTTAC  |

Table SV. Clinicopathological features of patients with gastric cancer.

| Characteristic                | Cases<br>(n=90) | DAZAP1 expression (%) |             | P-value |
|-------------------------------|-----------------|-----------------------|-------------|---------|
|                               |                 | Low (n=19)            | High (n=71) |         |
| Age, years                    |                 |                       |             | 0.69    |
| <60                           | 27              | 5 (18.52)             | 22 (81.58)  |         |
| ≥60                           | 63              | 14 (22.22)            | 49 (77.88)  |         |
| Sex                           |                 |                       |             | 0.29    |
| Male                          | 70              | 17 (24.28)            | 53 (75.71)  |         |
| Female                        | 20              | 2 (10.00)             | 18 (90.00)  |         |
| Differentiation               |                 |                       |             | 0.26    |
| Well                          | 26              | 3 (11.53)             | 23 (88.57)  |         |
| Moderate                      | 16              | 3 (18.75)             | 13 (81.35)  |         |
| Poor                          | 48              | 13 (27.08)            | 35 (72.90)  |         |
| Local invasion<br>(pT status) |                 |                       |             | <0.01   |
| T1/T2                         | 11              | 6 (54.54)             | 5 (45.55)   |         |
| T3/T4                         | 79              | 13 (16.45)            | 66 (83.55)  |         |

|                        |    |            |            |       |
|------------------------|----|------------|------------|-------|
| AJCC stage             |    |            |            |       |
| I/II                   | 37 | 13 (35.14) | 24 (64.86) | <0.01 |
| III/IV                 | 53 | 6 (11.32)  | 47 (88.68) |       |
| Lymph node (pN status) |    |            |            |       |
| N0                     | 22 | 9 (40.90)  | 13 (59.10) | 0.02  |
| N1                     | 68 | 10 (14.70) | 58 (85.30) |       |
| Tumor size, cm         |    |            |            | <0.01 |
| <5                     | 32 | 14 (43.75) | 18 (56.25) |       |
| ≥5                     | 58 | 5 (8.62)   | 53 (91.38) |       |

AJCC, American Joint Committee on Cancer; DAZAP, deleted in azoospermia-associated protein.

Table SVI. Transcripts potentially bound to DAZAP1.

| Transcript         | Gene   | P-value         | Gene ID | Description                                                   | Type         |
|--------------------|--------|-----------------|---------|---------------------------------------------------------------|--------------|
| XM_011542<br>241.3 | ATAD3B | 0.001169<br>38  | 83858   | ATPase family AAA domain-containing 3B, transcript variant X4 | mRNA         |
| NM_182752.<br>4    | TPRG1L | 0.002663<br>3   | 127262  | Tumor protein p63-regulated 1-like                            | mRNA         |
| NM_020710.<br>3    | LRRC47 | 0.002401<br>92  | 57470   | Leucine-rich repeat-containing 47                             | mRNA         |
| NM_001302<br>883.1 | CLSTN1 | 0.008158<br>3   | 22883   | Calsyntenin 1, transcript variant 3                           | mRNA         |
| NM_001302<br>883.1 | CLSTN1 | 1.43E-05        | 22883   | Calsyntenin 1, transcript variant 3                           | mRNA         |
| NM_001105<br>562.3 | UBE4B  | 0.043385<br>8   | 10277   | Ubiquitination factor E4B, transcript variant 1               | mRNA         |
| XR_0017369<br>07.2 | UBE4B  | 0.000822<br>568 | 10277   | Ubiquitination factor E4B, transcript variant X7              | misc_R<br>NA |
| XR_0017369         | UBE4B  | 0.000777        | 10277   | Ubiquitination factor E4B, transcript variant X7              | misc_R       |

|                 |         |                 |       |                                                              |      |
|-----------------|---------|-----------------|-------|--------------------------------------------------------------|------|
| 07.2            |         | 792             |       |                                                              | NA   |
| NM_183416.4     | KIF1B   | 0.000118<br>363 | 23095 | Kinesin family member 1B, transcript variant 2               | mRNA |
| NM_001365.952.1 | KIF1B   | 0.036449<br>2   | 23095 | Kinesin family member 1B, transcript variant 4               | mRNA |
| NM_001365.952.1 | KIF1B   | 0.004255<br>39  | 23095 | Kinesin family member 1B, transcript variant 4               | mRNA |
| NM_001304.451.2 | PGD     | 0.023692<br>5   | 5226  | Phosphogluconate dehydrogenase, transcript variant 2         | mRNA |
| NM_001304.451.2 | PGD     | 0.000452<br>538 | 5226  | Phosphogluconate dehydrogenase, transcript variant 2         | mRNA |
| XM_017001.495.2 | EXOSC10 | 0.002401<br>92  | 5394  | Exosome component 10, transcript variant X7                  | mRNA |
| NM_001386.501.1 | MTOR    | 0.007286<br>68  | 2475  | Mechanistic target of rapamycin kinase, transcript variant 3 | mRNA |
| NM_001386.500.1 | MTOR    | 0.011017<br>4   | 2475  | Mechanistic target of rapamycin kinase, transcript variant 2 | mRNA |
| NM_001386       | MTOR    | 0.001316        | 2475  | Mechanistic target of rapamycin kinase, transcript variant 2 | mRNA |

|            |          |          |       |                                                                         |      |
|------------|----------|----------|-------|-------------------------------------------------------------------------|------|
| 500.1      |          | 87       |       |                                                                         |      |
| NM_001386  | MTOR     | 0.014848 | 2475  | Mechanistic target of rapamycin kinase, transcript variant 2            | mRNA |
| 500.1      |          | 8        |       |                                                                         |      |
| NM_001386  | MTOR     | 0.000199 | 2475  | Mechanistic target of rapamycin kinase, transcript variant 2            | mRNA |
| 500.1      |          | 653      |       |                                                                         |      |
| NM_001386  | MTOR     | 0.013925 | 2475  | Mechanistic target of rapamycin kinase, transcript variant 2            | mRNA |
| 500.1      |          | 3        |       |                                                                         |      |
| XM_017000  | MTOR     | 2.78E-09 | 2475  | Mechanistic target of rapamycin kinase, transcript variant X7           | mRNA |
| 902.1      |          |          |       |                                                                         |      |
| NM_000302. | PLOD1    | 0.026886 | 5351  | Procollagen-lysine,2-oxoglutarate 5-dioxygenase 1, transcript variant 2 | mRNA |
| 4          |          | 6        |       |                                                                         |      |
| XM_005263  | MFN2     | 3.40E-13 | 9927  | Mitofusin 2, transcript variant X1                                      | mRNA |
| 547.3      |          |          |       |                                                                         |      |
| XM_017002  | TNFRSF1B | 0.048575 | 7133  | TNF receptor superfamily member 1B, transcript variant X1               | mRNA |
| 211.1      |          |          |       |                                                                         |      |
| XM_011542  | TNFRSF1B | 1.69E-05 | 7133  | TNF receptor superfamily member 1B, transcript variant X2               | mRNA |
| 060.2      |          |          |       |                                                                         |      |
| NM_018156. | VPS13D   | 0.000740 | 55187 | Vacuolar protein sorting 13 homolog D, transcript variant 2             | mRNA |

|                    |         |                 |        |                                                                            |      |
|--------------------|---------|-----------------|--------|----------------------------------------------------------------------------|------|
| 4                  |         | 067             |        |                                                                            |      |
| XM_005245<br>790.4 | PLEKHM2 | 0.001900<br>81  | 23207  | Pleckstrin homology and RUN domain containing M2, transcript variant X3    | mRNA |
| NM_017940.<br>6    | NBPF1   | 0.012354        | 55672  | NBPF member 1                                                              | mRNA |
| XM_017000<br>847.1 | ATP13A2 | 0.000561<br>997 | 23400  | ATPase cation-transporting 13A2, transcript variant X10                    | mRNA |
| XM_017000<br>847.1 | ATP13A2 | 3.05E-07        | 23400  | ATPase cation-transporting 13A2, transcript variant X10                    | mRNA |
| NM_018715.<br>4    | RCC2    | 1.90E-07        | 55920  | Regulator of chromosome condensation 2, transcript variant 1               | mRNA |
| XM_011540<br>630.2 | IFFO2   | 0.007286<br>68  | 126917 | Intermediate filament family orphan 2, transcript variant X1               | mRNA |
| XM_011541<br>113.3 | UBR4    | 0.000657<br>308 | 23352  | Ubiquitin protein ligase E3 component n-recognin 4, transcript variant X6  | mRNA |
| XM_017000<br>824.2 | UBR4    | 0.006074<br>62  | 23352  | Ubiquitin protein ligase E3 component n-recognin 4, transcript variant X14 | mRNA |
| XM_017000          | UBR4    | 0.009268        | 23352  | Ubiquitin protein ligase E3 component n-recognin 4, transcript variant X14 | mRNA |

|           |         |          |        |                                                                              |      |
|-----------|---------|----------|--------|------------------------------------------------------------------------------|------|
| 824.2     |         | 78       |        |                                                                              |      |
| XM_017000 | UBR4    | 0.000257 | 23352  | Ubiquitin protein ligase E3 component n-recogin 4, transcript variant X14    | mRNA |
| 824.2     |         | 885      |        |                                                                              |      |
| XM_017000 | UBR4    | 3.69E-06 | 23352  | Ubiquitin protein ligase E3 component n-recogin 4, transcript variant X14    | mRNA |
| 824.2     |         |          |        |                                                                              |      |
| XM_011541 | UBR4    | 3.99E-07 | 23352  | Ubiquitin protein ligase E3 component n-recogin 4, transcript variant X6     | mRNA |
| 113.3     |         |          |        |                                                                              |      |
| XM_017000 | UBR4    | 0.000358 | 23352  | Ubiquitin protein ligase E3 component n-recogin 4, transcript variant X14    | mRNA |
| 824.2     |         | 192      |        |                                                                              |      |
| XM_017002 | EIF4G3  | 0.012354 | 8672   | Eukaryotic translation initiation factor 4 $\gamma$ 3, transcript variant X6 | mRNA |
| 675.2     |         |          |        |                                                                              |      |
| NM_001013 | LDLRAD2 | 3.40E-13 | 401944 | Low-density lipoprotein receptor class A domain-containing 2                 | mRNA |
| 693.3     |         |          |        |                                                                              |      |
| XM_011541 | HSPG2   | 9.25E-08 | 3339   | Heparan sulfate proteoglycan 2, transcript variant X1                        | mRNA |
| 318.2     |         |          |        |                                                                              |      |
| XM_011541 | HSPG2   | 3.40E-13 | 3339   | Heparan sulfate proteoglycan 2, transcript variant X1                        | mRNA |
| 318.2     |         |          |        |                                                                              |      |
| XM_017000 | KDM1A   | 0.001786 | 23028  | Lysine demethylase 1A, transcript variant X6                                 | mRNA |

|                    |         |                 |       |                                                                     |      |
|--------------------|---------|-----------------|-------|---------------------------------------------------------------------|------|
| 717.1              |         | 4               |       |                                                                     |      |
| NM_003198.<br>3    | ELOA    | 0.003582<br>26  | 6924  | Elongin A                                                           | mRNA |
| NM_006015.<br>6    | ARID1A  | 2.13E-06        | 8289  | AT-rich interaction domain 1A, transcript variant 1                 | mRNA |
| NM_139135.<br>4    | ARID1A  | 0.000338<br>213 | 8289  | AT-rich interaction domain 1A, transcript variant 2                 | mRNA |
| NM_015023.<br>5    | WDTC1   | 0.005433<br>82  | 23038 | WD and tetratricopeptide repeats 1, transcript variant 2            | mRNA |
| NM_001201<br>404.3 | WASF2   | 0.004766<br>76  | 10163 | WASP family member 2, transcript variant 2                          | mRNA |
| NM_001350<br>161.2 | PHACTR4 | 0.016627<br>6   | 65979 | Phosphatase and actin regulator 4, transcript variant 6             | mRNA |
| NM_005704.<br>5    | PTPRU   | 0.000125<br>229 | 10076 | Protein tyrosine phosphatase receptor type U, transcript variant 3  | mRNA |
| NM_014676.<br>3    | PUM1    | 0.000425<br>096 | 9698  | Pumilio RNA-binding family member 1, transcript variant 2           | mRNA |
| NM_001321          | THRAP3  | 8.52E-09        | 9967  | Thyroid hormone receptor-associated protein 3, transcript variant 3 | mRNA |

|                    |        |                 |       |                                                               |      |
|--------------------|--------|-----------------|-------|---------------------------------------------------------------|------|
| 473.2              |        |                 |       |                                                               |      |
| NM_012090.<br>5    | MACF1  | 0.030044<br>3   | 23499 | Microtubule actin crosslinking factor 1, transcript variant 1 | mRNA |
| NM_001394<br>062.1 | MACF1  | 2.54E-06        | 23499 | Microtubule actin crosslinking factor 1, transcript variant 2 | mRNA |
| NM_001394<br>062.1 | MACF1  | 4.80E-10        | 23499 | Microtubule actin crosslinking factor 1, transcript variant 2 | mRNA |
| NM_001394<br>062.1 | MACF1  | 0.000510<br>829 | 23499 | Microtubule actin crosslinking factor 1, transcript variant 2 | mRNA |
| NM_001394<br>062.1 | MACF1  | 0.004022<br>4   | 23499 | Microtubule actin crosslinking factor 1, transcript variant 2 | mRNA |
| NM_001394<br>062.1 | MACF1  | 0.006445<br>37  | 23499 | Microtubule actin crosslinking factor 1, transcript variant 2 | mRNA |
| NM_001394<br>062.1 | MACF1  | 3.40E-13        | 23499 | Microtubule actin crosslinking factor 1, transcript variant 2 | mRNA |
| NM_001135<br>653.2 | PABPC4 | 6.31E-06        | 8761  | poly(A) binding protein cytoplasmic 4, transcript variant 1   | mRNA |
| NM_014663.         | KDM4A  | 0.026886        | 9682  | Lysine demethylase 4A                                         | mRNA |

|                    |         |                 |        |                                                                  |              |
|--------------------|---------|-----------------|--------|------------------------------------------------------------------|--------------|
| 3                  |         | 6               |        |                                                                  |              |
| XM_005271<br>355.3 | KDM4A   | 0.014848<br>8   | 9682   | Lysine demethylase 4A, transcript variant X1                     | mRNA         |
| NM_001297<br>655.2 | KIF2C   | 0.015633<br>2   | 11004  | Kinesin family member 2C, transcript variant 2                   | mRNA         |
| XR_0017373<br>58.2 | GPBP1L1 | 0.000273<br>438 | 60313  | GC-rich promoter binding protein 1 like 1, transcript variant X6 | misc_R<br>NA |
| NM_001242<br>361.2 | NRDC    | 6.76E-05        | 4898   | Nardilysin convertase, transcript variant 3                      | mRNA         |
| XM_011542<br>437.2 | ZFYVE9  | 0.010431<br>9   | 9372   | Zinc finger FYVE-type-containing 9, transcript variant X1        | mRNA         |
| XM_005270<br>590.2 | CC2D1B  | 7.11E-05        | 200014 | Coiled-coil and C2 domain-containing 1B, transcript variant X1   | mRNA         |
| XM_017000<br>559.1 | CC2D1B  | 0.025326<br>2   | 200014 | Coiled-coil and C2 domain-containing 1B, transcript variant X8   | mRNA         |
| NM_001305<br>066.2 | TMEM59  | 0.000187<br>923 | 9528   | Transmembrane protein 59, transcript variant 5                   | mRNA         |
| XM_017000          | USP24   | 0.045986        | 23358  | Ubiquitin-specific peptidase 24, transcript variant X2           | mRNA         |

|            |         |          |        |                                                                  |      |
|------------|---------|----------|--------|------------------------------------------------------------------|------|
| 832.1      |         |          |        |                                                                  |      |
| XM_017000  | USP24   | 4.01E-08 | 23358  | Ubiquitin-specific peptidase 24, transcript variant X2           | mRNA |
| 832.1      |         |          |        |                                                                  |      |
| XM_017000  | USP24   | 2.87E-07 | 23358  | Ubiquitin-specific peptidase 24, transcript variant X2           | mRNA |
| 832.1      |         |          |        |                                                                  |      |
| XM_017000  | USP24   | 0.013925 | 23358  | Ubiquitin-specific peptidase 24, transcript variant X2           | mRNA |
| 832.1      |         | 3        |        |                                                                  |      |
| XM_017002  | FUBP1   | 3.52E-09 | 8880   | Far upstream element-binding protein 1, transcript variant X5    | mRNA |
| 740.2      |         |          |        |                                                                  |      |
| XM_006710  | ABCD3   | 0.001316 | 5825   | ATP-binding cassette subfamily D member 3, transcript variant X1 | mRNA |
| 802.2      |         | 87       |        |                                                                  |      |
| XM_017000  | CNN3    | 7.11E-05 | 1266   | Calponin 3, transcript variant X1                                | mRNA |
| 245.2      |         |          |        |                                                                  |      |
| NM_033055. | MFSD14A | 0.003582 | 64645  | Major facilitator superfamily domain-containing 14A              | mRNA |
| 3          |         | 26       |        |                                                                  |      |
| NM_003729. | RTCA    | 0.003036 | 8634   | RNA 3'-terminal phosphate cyclase, transcript variant 2          | mRNA |
| 4          |         | 24       |        |                                                                  |      |
| XM_017000  | SLC30A7 | 0.013087 | 148867 | Solute carrier family 30 member 7, transcript variant X4         | mRNA |

|            |         |          |        |                                                            |        |
|------------|---------|----------|--------|------------------------------------------------------------|--------|
| 401.2      |         | 7        |        |                                                            |        |
| NM_001010  | FAM102B | 0.008685 | 284611 | Family with sequence similarity 102 member B               | mRNA   |
| 883.3      |         | 41       |        |                                                            |        |
| NM_013296. | GPSM2   | 0.000546 | 29899  | G protein signaling modulator 2, transcript variant 3      | mRNA   |
| 5          |         | 28       |        |                                                            |        |
| XM_006710  | GPSM2   | 0.017620 | 29899  | G protein signaling modulator 2, transcript variant X5     | mRNA   |
| 589.3      |         | 9        |        |                                                            |        |
| XM_005271  | SORT1   | 0.021103 | 6272   | Sortilin 1, transcript variant X1                          | mRNA   |
| 100.2      |         | 3        |        |                                                            |        |
| XM_011540  | AHCYL1  | 1.72E-08 | 10768  | Adenosylhomocysteinase-like 1, transcript variant X1       | mRNA   |
| 535.2      |         |          |        |                                                            |        |
| XM_011540  | AHCYL1  | 0.000169 | 10768  | Aenosylhomocysteinase-like 1, transcript variant X1        | mRNA   |
| 535.2      |         | 724      |        |                                                            |        |
| XR_0029578 | STRIP1  | 0.004022 | 85369  | Striatin-interacting protein 1, transcript variant X3      | misc_R |
| 54.1       |         | 4        |        |                                                            | NA     |
| NR_073071. | STRIP1  | 0.006445 | 85369  | Striatin-interacting protein 1, transcript variant 3       | misc_R |
| 2          |         | 37       |        |                                                            | NA     |
| NM_002884. | RAP1A   | 0.040914 | 5906   | RAP1A, member of RAS oncogene family, transcript variant 2 | mRNA   |

|                    |        |                |       |                                                                                               |              |
|--------------------|--------|----------------|-------|-----------------------------------------------------------------------------------------------|--------------|
| 4                  |        |                |       |                                                                                               |              |
| XR_0017371<br>85.2 | MOV10  | 0.006864<br>88 | 4343  | Mov10 RISC complex RNA helicase, transcript variant X6                                        | misc_R<br>NA |
| NM_002524.<br>5    | NRAS   | 0.022186<br>4  | 4893  | NRAS proto-oncogene, GTPase                                                                   | mRNA         |
| NM_001242<br>893.2 | CSDE1  | 4.60E-10       | 7812  | Cold shock domain-containing E1, transcript variant 6                                         | mRNA         |
| XM_017001<br>361.1 | ATP1A1 | 0.009268<br>78 | 476   | ATPase Na <sup>+</sup> /K <sup>+</sup> transporting subunit $\alpha$ 1, transcript variant X2 | mRNA         |
| NM_024408.<br>4    | NOTCH2 | 5.39E-10       | 4853  | Notch receptor 2, transcript variant 1                                                        | mRNA         |
| NM_024408.<br>4    | NOTCH2 | 2.09E-07       | 4853  | Notch receptor 2, transcript variant 1                                                        | mRNA         |
| NM_001200<br>001.2 | NOTCH2 | 0.003393<br>83 | 4853  | Notch receptor 2, transcript variant 2                                                        | mRNA         |
| XM_005272<br>971.4 | BCL9   | 0.018591<br>3  | 607   | BCL9 transcription coactivator, transcript variant X1                                         | mRNA         |
| NM_020205.         | OTUD7B | 0.034207       | 56957 | OTU deubiquitinase 7B                                                                         | mRNA         |

|                    |         |                 |       |                                                                        |      |
|--------------------|---------|-----------------|-------|------------------------------------------------------------------------|------|
| 4                  |         | 6               |       |                                                                        |      |
| XM_017001<br>294.1 | ARNT    | 0.045986        | 405   | Aryl hydrocarbon receptor nuclear translocator, transcript variant X13 | mRNA |
| NM_001350<br>226.2 | ARNT    | 0.004766<br>76  | 405   | Aryl hydrocarbon receptor nuclear translocator, transcript variant 9   | mRNA |
| NM_001369<br>624.1 | PI4KB   | 0.000178<br>792 | 5298  | Phosphatidylinositol 4-kinase beta, transcript variant 7               | mRNA |
| XM_005245<br>365.5 | CGN     | 5.78E-08        | 57530 | Cingulin, transcript variant X1                                        | mRNA |
| XM_005245<br>365.5 | CGN     | 0.000101<br>311 | 57530 | Cingulin, transcript variant X1                                        | mRNA |
| NM_001367<br>466.1 | DENND4B | 0.003582<br>26  | 9909  | DENN domain-containing 4B, transcript variant 2                        | mRNA |
| XM_011510<br>219.1 | DENND4B | 3.98E-05        | 9909  | DENN domain-containing 4B, transcript variant X1                       | mRNA |
| XM_011510<br>219.1 | DENND4B | 0.011664<br>8   | 9909  | DENN domain-containing 4B, transcript variant X1                       | mRNA |
| XM_024451          | UBAP2L  | 6.74E-06        | 9898  | Ubiquitin-associated protein 2-like, transcript variant X29            | mRNA |

|                    |          |                |        |                                                                        |      |
|--------------------|----------|----------------|--------|------------------------------------------------------------------------|------|
| 291.1              |          |                |        |                                                                        |      |
| NM_001365<br>045.1 | ADAR     | 0.001039<br>18 | 103    | Adenosine deaminase RNA specific, transcript variant 6                 | mRNA |
| NM_001171<br>811.2 | GBA      | 0.028282<br>8  | 2629   | Glucosylceramidase $\beta$ , transcript variant 4                      | mRNA |
| XM_017002<br>797.2 | ARHGEF2  | 0.028282<br>8  | 9181   | Rho/Rac guanine nucleotide exchange factor 2, transcript variant X13   | mRNA |
| NM_001257<br>374.3 | LMNA     | 3.40E-13       | 4000   | Lamin A/C, transcript variant 4                                        | mRNA |
| XM_024453<br>274.1 | IQGAP3   | 0.040914       | 128239 | IQ motif-containing GTPase-activating protein 3, transcript variant X2 | mRNA |
| XM_011509<br>198.3 | IQGAP3   | 0.048575       | 128239 | IQ motif-containing GTPase-activating protein 3, transcript variant X4 | mRNA |
| NM_006617.<br>2    | NES      | 0.014848<br>8  | 10763  | Nestin                                                                 | mRNA |
| NM_001377<br>419.1 | ARHGEF11 | 0.028282<br>8  | 9826   | $\rho$ guanine nucleotide exchange factor 11, transcript variant 4     | mRNA |
| NM_001377          | ARHGEF11 | 0.006074       | 9826   | $\rho$ guanine nucleotide exchange factor 11, transcript variant 4     | mRNA |

|                    |          |                 |       |                                                                      |              |
|--------------------|----------|-----------------|-------|----------------------------------------------------------------------|--------------|
| 419.1              |          | 62              |       |                                                                      |              |
| XM_006711<br>661.3 | ARHGEF11 | 0.012354        | 9826  | $\rho$ guanine nucleotide exchange factor 11, transcript variant X4  | mRNA         |
| XM_006711<br>661.3 | ARHGEF11 | 0.015633<br>2   | 9826  | $\rho$ guanine nucleotide exchange factor 11, transcript variant X4  | mRNA         |
| NM_001135<br>050.2 | IGSF9    | 0.001106<br>25  | 57549 | Immunoglobulin superfamily member 9, transcript variant 1            | mRNA         |
| NR_028103.<br>2    | DCAF8    | 0.011664<br>8   | 50717 | DDB1 and CUL4-associated factor 8, transcript variant 2              | misc_R<br>NA |
| NM_001098<br>398.2 | COPA     | 0.003582<br>26  | 1314  | COPI coat complex subunit $\alpha$ , transcript variant 1            | mRNA         |
| NM_004371.<br>4    | COPA     | 1.47E-07        | 1314  | COPI coat complex subunit $\alpha$ , transcript variant 2            | mRNA         |
| NM_004550.<br>5    | NDUFS2   | 0.005747<br>95  | 4720  | NADH:ubiquinone oxidoreductase core subunit S2, transcript variant 1 | mRNA         |
| XM_011509<br>308.1 | ATF6     | 0.000273<br>438 | 22926 | Activating transcription factor 6, transcript variant X1             | mRNA         |
| NM_000696.         | ALDH9A1  | 0.013087        | 223   | Aldehyde dehydrogenase 9 family member A1, transcript variant 1      | mRNA         |

|            |         |          |        |                                                                       |      |
|------------|---------|----------|--------|-----------------------------------------------------------------------|------|
| 4          |         | 7        |        |                                                                       |      |
| NM_000696. | ALDH9A1 | 0.000273 | 223    | Aldehyde dehydrogenase 9 family member A1, transcript variant 1       | mRNA |
| 4          |         | 438      |        |                                                                       |      |
| NM_003953. | MPZL1   | 4.76E-05 | 9019   | Myelin protein zero like 1, transcript variant 1                      | mRNA |
| 6          |         |          |        |                                                                       |      |
| XM_005245  | PRRC2C  | 4.23E-05 | 23215  | Proline-rich coiled-coil 2C, transcript variant X10                   | mRNA |
| 023.2      |         |          |        |                                                                       |      |
| NM_014283. | SUCO    | 1.92E-05 | 51430  | SUN domain containing ossification factor, transcript variant 1       | mRNA |
| 5          |         |          |        |                                                                       |      |
| NM_014283. | SUCO    | 9.53E-05 | 51430  | SUN domain containing ossification factor, transcript variant 1       | mRNA |
| 5          |         |          |        |                                                                       |      |
| NM_016227. | SUCO    | 0.011664 | 51430  | SUN domain containing ossification factor, transcript variant 2       | mRNA |
| 4          |         | 8        |        |                                                                       |      |
| NM_001365  | DARS2   | 0.028282 | 55157  | Aspartyl-tRNA synthetase 2, mitochondrial, transcript variant 3       | mRNA |
| 213.2      |         | 8        |        |                                                                       |      |
| NM_172071. | RC3H1   | 0.009859 | 149041 | Ring finger and CCCH-type domains 1, transcript variant 2             | mRNA |
| 4          |         | 34       |        |                                                                       |      |
| XM_017001  | RALGPS2 | 0.000338 | 55103  | Ral GEF with PH domain and SH3 binding motif 2, transcript variant X4 | mRNA |

|                    |        |                |      |                                                                 |      |
|--------------------|--------|----------------|------|-----------------------------------------------------------------|------|
| 591.2              |        | 213            |      |                                                                 |      |
| XM_017002<br>930.1 | CEP350 | 9.29E-06       | 9857 | Centrosomal protein 350, transcript variant X3                  | mRNA |
| NM_001033<br>044.4 | GLUL   | 8.06E-06       | 2752 | Glutamate-ammonia ligase, transcript variant 2                  | mRNA |
| NM_001357.<br>5    | DHX9   | 7.43E-08       | 1660 | DExH-box helicase 9, transcript variant 1                       | mRNA |
| NM_001357.<br>5    | DHX9   | 3.87E-06       | 1660 | DExH-box helicase 9, transcript variant 1                       | mRNA |
| NM_001357.<br>5    | DHX9   | 9.29E-06       | 1660 | DExH-box helicase 9, transcript variant 1                       | mRNA |
| NM_002293.<br>4    | LAMC1  | 3.40E-13       | 3915 | Laminin subunit gamma 1                                         | mRNA |
| XM_017001<br>273.2 | LAMC2  | 0.004022<br>4  | 3918 | Laminin subunit $\gamma$ 2, transcript variant X1               | mRNA |
| NM_018891.<br>3    | LAMC2  | 0.005747<br>95 | 3918 | Laminin subunit $\gamma$ 2, transcript variant 2                | mRNA |
| XM_011510          | SMG7   | 4.60E-10       | 9887 | SMG7 nonsense-mediated mRNA decay factor, transcript variant X1 | mRNA |

|                |         |            |       |                                                                                            |      |
|----------------|---------|------------|-------|--------------------------------------------------------------------------------------------|------|
| 205.3          |         |            |       |                                                                                            |      |
| NM_003292.3    | TPR     | 0.00148402 | 7175  | Translocated promoter region, nuclear basket protein                                       | mRNA |
| NM_003292.3    | TPR     | 0.0342076  | 7175  | Translocated promoter region, nuclear basket protein                                       | mRNA |
| NM_003292.3    | TPR     | 0.00770001 | 7175  | Translocated promoter region, nuclear basket protein                                       | mRNA |
| XM_017000731.1 | KIF21B  | 0.00103918 | 23046 | Kinesin family member 21B, transcript variant X1                                           | mRNA |
| XM_011509092.2 | KDM5B   | 6.38E-05   | 10765 | Lysine demethylase 5B, transcript variant X3                                               | mRNA |
| NM_001365783.2 | ATP2B4  | 0.00985934 | 493   | ATPase plasma membrane Ca <sup>2+</sup> transporting 4, transcript variant 3               | mRNA |
| XM_017001474.1 | PIK3C2B | 0.00770001 | 5287  | Phosphatidylinositol-4-phosphate 3-kinase catalytic subunit type 2β, transcript variant X5 | mRNA |
| XM_005273164.3 | PLXNA2  | 0.0156332  | 5362  | Plexin A2, transcript variant X1                                                           | mRNA |
| XM_005273      | PLXNA2  | 0.012354   | 5362  | Plexin A2, transcript variant X1                                                           | mRNA |

|                    |       |                 |       |                                                 |      |
|--------------------|-------|-----------------|-------|-------------------------------------------------|------|
| 164.3              |       |                 |       |                                                 |      |
| NM_001017<br>402.2 | LAMB3 | 3.69E-06        | 3914  | Laminin subunit $\beta$ 3, transcript variant 2 | mRNA |
| NM_016343.<br>4    | CENPF | 0.002538<br>27  | 1063  | Centromere protein F                            | mRNA |
| XM_017000<br>086.2 | CENPF | 1.43E-05        | 1063  | Centromere protein F, transcript variant X1     | mRNA |
| NM_004446.<br>3    | EPRS1 | 0.000178<br>792 | 2058  | Glutamyl-prolyl-tRNA synthetase 1               | mRNA |
| NM_018060.<br>4    | IARS2 | 3.40E-13        | 55699 | Isoleucyl-tRNA synthetase 2, mitochondrial      | mRNA |
| NM_018060.<br>4    | IARS2 | 2.16E-07        | 55699 | Isoleucyl-tRNA synthetase 2, mitochondrial      | mRNA |
| XM_011544<br>185.3 | LBR   | 6.38E-05        | 3930  | Lamin B receptor, transcript variant X1         | mRNA |
| NM_001618.<br>4    | PARP1 | 4.80E-10        | 142   | Poly(ADP-ribose) polymerase 1                   | mRNA |
| NM_001618.         | PARP1 | 1.42E-06        | 142   | Poly(ADP-ribose) polymerase 1                   | mRNA |

|                    |          |                |       |                                                                |              |
|--------------------|----------|----------------|-------|----------------------------------------------------------------|--------------|
| 4                  |          |                |       |                                                                |              |
| NM_001618.<br>4    | PARP1    | 0.004497<br>29 | 142   | Poly(ADP-ribose) polymerase 1                                  | mRNA         |
| XM_011544<br>238.1 | COQ8A    | 0.001676<br>3  | 56997 | Coenzyme Q8A, transcript variant X3                            | mRNA         |
| XM_017002<br>580.2 | CDC42BPA | 3.37E-07       | 8476  | CDC42-binding protein kinase $\alpha$ , transcript variant X14 | mRNA         |
| XR_0017372<br>99.2 | NUP133   | 0.008158<br>3  | 55746 | Nucleoporin 133, transcript variant X1                         | misc_R<br>NA |
| NM_007357.<br>3    | COG2     | 0.013925<br>3  | 22796 | Component of oligomeric golgi complex 2, transcript variant 1  | mRNA         |
| NM_001145<br>036.2 | COG2     | 0.022186<br>4  | 22796 | Component of oligomeric golgi complex 2, transcript variant 2  | mRNA         |
| NM_001145<br>036.2 | COG2     | 0.009268<br>78 | 22796 | Component of oligomeric golgi complex 2, transcript variant 2  | mRNA         |
| NM_018072.<br>6    | HEATR1   | 3.69E-06       | 55127 | HEAT repeat-containing 1                                       | mRNA         |
| NM_018072.         | HEATR1   | 0.018591       | 55127 | HEAT repeat-containing 1                                       | mRNA         |

|            |         |          |       |                                                                               |      |
|------------|---------|----------|-------|-------------------------------------------------------------------------------|------|
| 6          |         | 3        |       |                                                                               |      |
| NM_018072. | HEATR1  | 0.001900 | 55127 | HEAT repeat-containing 1                                                      | mRNA |
| 6          |         | 81       |       |                                                                               |      |
| NM_018072. | HEATR1  | 0.015633 | 55127 | HEAT repeat-containing 1                                                      | mRNA |
| 6          |         | 2        |       |                                                                               |      |
| NM_001291  | MTR     | 0.005747 | 4548  | 5-Methyltetrahydrofolate-homocysteine methyltransferase, transcript variant 2 | mRNA |
| 939.1      |         | 95       |       |                                                                               |      |
| XM_011544  | EXO1    | 0.023692 | 9156  | Exonuclease 1, transcript variant X7                                          | mRNA |
| 325.2      |         | 5        |       |                                                                               |      |
| XM_017002  | CEP170  | 1.35E-06 | 9859  | Centrosomal protein 170, transcript variant X32                               | mRNA |
| 951.2      |         |          |       |                                                                               |      |
| NM_001322  | SH3BP5L | 0.011017 | 80851 | SH3-binding domain protein 5 like, transcript variant 3                       | mRNA |
| 463.1      |         | 4        |       |                                                                               |      |
| XM_017015  | LARP4B  | 8.86E-07 | 23185 | La ribonucleoprotein 4B, transcript variant X4                                | mRNA |
| 990.1      |         |          |       |                                                                               |      |
| NM_001242  | PFKP    | 0.014848 | 5214  | Phosphofructokinase, platelet, transcript variant 2                           | mRNA |
| 339.2      |         | 8        |       |                                                                               |      |
| NM_001323  | PFKP    | 0.000380 | 5214  | Phosphofructokinase, platelet, transcript variant 8                           | mRNA |

|                    |          |                 |       |                                                                    |      |
|--------------------|----------|-----------------|-------|--------------------------------------------------------------------|------|
| 072.2              |          | 287             |       |                                                                    |      |
| NM_001242<br>339.2 | PFKP     | 6.31E-06        | 5214  | Phosphofructokinase, platelet, transcript variant 2                | mRNA |
| NM_014889.<br>4    | PITRM1   | 0.031976<br>3   | 10531 | Pitrilysin metalloproteinase 1, transcript variant 2               | mRNA |
| NM_001391<br>960.1 | USP6NL   | 0.021103<br>3   | 9712  | USP6 N-terminal-like, transcript variant 5                         | mRNA |
| NM_018706.<br>7    | DHTKD1   | 0.000141<br>056 | 55526 | Dehydrogenase E1 and transketolase domain containing 1             | mRNA |
| NM_018706.<br>7    | DHTKD1   | 0.048575        | 55526 | Dehydrogenase E1 and transketolase domain-containing 1             | mRNA |
| NM_001324<br>287.2 | STAM     | 0.022186<br>4   | 8027  | Signal transducing adaptor molecule, transcript variant 2          | mRNA |
| XM_017016<br>536.2 | DNAJC1   | 0.043385<br>8   | 64215 | DnaJ heat shock protein family 40 member C1, transcript variant X2 | mRNA |
| NM_005180.<br>9    | BMI1     | 0.002538<br>27  | 648   | BMI1 proto-oncogene, polycomb ring finger                          | mRNA |
| NM_001282          | KIAA1217 | 0.000425        | 56243 | KIAA1217, transcript variant 4                                     | mRNA |

|                    |          |                |       |                                                               |      |
|--------------------|----------|----------------|-------|---------------------------------------------------------------|------|
| 767.2              |          | 096            |       |                                                               |      |
| NM_001253<br>866.2 | YME1L1   | 0.003798<br>1  | 10730 | YME1-like 1 ATPase, transcript variant 4                      | mRNA |
| NM_001253<br>866.2 | YME1L1   | 1.52E-05       | 10730 | YME1-like 1 ATPase, transcript variant 4                      | mRNA |
| XM_024448<br>146.1 | SVIL     | 0.007700<br>01 | 6840  | Supervillin, transcript variant X14                           | mRNA |
| NM_004521.<br>3    | KIF5B    | 0.014848<br>8  | 3799  | Kinesin family member 5B                                      | mRNA |
| NM_002211.<br>4    | ITGB1    | 3.40E-13       | 3688  | Integrin subunit $\beta$ 1, transcript variant 1A             | mRNA |
| NM_020987.<br>5    | ANK3     | 4.23E-05       | 288   | Ankyrin 3, transcript variant 1                               | mRNA |
| NM_001322<br>366.1 | HK1      | 0.043385<br>8  | 3098  | Hexokinase 1, transcript variant 8                            | mRNA |
| NM_004096.<br>5    | EIF4EBP2 | 0.006445<br>37 | 1979  | Eukaryotic translation initiation factor 4E-binding protein 2 | mRNA |
| NM_001320          | ANXA7    | 0.003216       | 310   | Annexin A7, transcript variant 3                              | mRNA |

|                 |        |                 |       |                                                             |      |
|-----------------|--------|-----------------|-------|-------------------------------------------------------------|------|
| 880.2           |        | 51              |       |                                                             |      |
| NM_014000.3     | VCL    | 0.000338<br>213 | 7414  | Vinculin, transcript variant 1                              | mRNA |
| XM_011540.346.2 | DLG5   | 7.51E-05        | 9231  | Discs large MAGUK scaffold protein 5, transcript variant X8 | mRNA |
| XM_017016.913.1 | DLG5   | 5.04E-05        | 9231  | Discs large MAGUK scaffold protein 5, transcript variant X4 | mRNA |
| NM_007055.4     | POLR3A | 0.006864<br>88  | 11128 | RNA polymerase III subunit A                                | mRNA |
| NM_001377.163.1 | SHLD2  | 0.028282<br>8   | 54537 | Shieldin complex subunit 2, transcript variant 8            | mRNA |
| NM_004523.4     | KIF11  | 0.000242<br>029 | 3832  | Kinesin family member 11                                    | mRNA |
| XM_017016.069.1 | MYOF   | 3.40E-13        | 26509 | Myoferlin, transcript variant X5                            | mRNA |
| XM_017016.069.1 | MYOF   | 0.001316<br>87  | 26509 | Myoferlin, transcript variant X5                            | mRNA |
| XM_017016       | MYOF   | 3.40E-13        | 26509 | Myoferlin, transcript variant X5                            | mRNA |

|            |        |          |       |                                                                                          |      |
|------------|--------|----------|-------|------------------------------------------------------------------------------------------|------|
| 069.1      |        |          |       |                                                                                          |      |
| XM_011539  | MYOF   | 0.008158 | 26509 | Myoferlin, transcript variant X3                                                         | mRNA |
| 632.2      |        | 3        |       |                                                                                          |      |
| NM_001289  | HELLS  | 0.000358 | 3070  | Helicase, lymphoid-specific, transcript variant 4                                        | mRNA |
| 069.2      |        | 192      |       |                                                                                          |      |
| NM_020992. | PDLIM1 | 0.022186 | 9124  | PDZ and LIM domain 1                                                                     | mRNA |
| 4          |        | 4        |       |                                                                                          |      |
| NM_015631. | TCTN3  | 0.000987 | 26123 | Tectonic family member 3, transcript variant 1                                           | mRNA |
| 6          |        | 21       |       |                                                                                          |      |
| NM_002079. | GOT1   | 1.94E-08 | 2805  | Glutamic-oxaloacetic transaminase 1                                                      | mRNA |
| 3          |        |          |       |                                                                                          |      |
| NM_001347  | ERLIN1 | 0.015633 | 10613 | ER lipid raft associated 1, transcript variant 8                                         | mRNA |
| 858.2      |        | 2        |       |                                                                                          |      |
| NM_001320  | CHUK   | 0.048575 | 1147  | Component of inhibitor of nuclear factor $\kappa$ B kinase complex, transcript variant 2 | mRNA |
| 928.2      |        |          |       |                                                                                          |      |
| NM_001391  | GBF1   | 0.006864 | 8729  | Golgi brefeldin A resistant guanine nucleotide exchange factor 1, transcript variant 19  | mRNA |
| 927.1      |        | 88       |       |                                                                                          |      |
| NM_014720. | SLK    | 0.040914 | 9748  | STE20-like kinase, transcript variant 1                                                  | mRNA |

|            |        |          |       |                                                                           |      |
|------------|--------|----------|-------|---------------------------------------------------------------------------|------|
| 4          |        |          |       |                                                                           |      |
| NM_014720. | SLK    | 0.002016 | 9748  | STE20-like kinase, transcript variant 1                                   | mRNA |
| 4          |        | 29       |       |                                                                           |      |
| XM_024447  | ADD3   | 3.40E-13 | 120   | Adducin 3, transcript variant X4                                          | mRNA |
| 797.1      |        |          |       |                                                                           |      |
| NM_005445. | SMC3   | 0.000777 | 9126  | Structural maintenance of chromosomes 3                                   | mRNA |
| 4          |        | 792      |       |                                                                           |      |
| NM_001351  | ZDHHC6 | 0.000822 | 64429 | Zinc finger DHHC-type palmitoyltransferase 6, transcript variant 7        | mRNA |
| 086.2      |        | 568      |       |                                                                           |      |
| XM_017016  | CASP7  | 0.038533 | 840   | Caspase 7, transcript variant X1                                          | mRNA |
| 763.1      |        | 3        |       |                                                                           |      |
| NM_001135  | FHIP2A | 1.28E-06 | 57700 | FHF complex subunit HOOK interacting protein 2A, transcript variant 2     | mRNA |
| 051.2      |        |          |       |                                                                           |      |
| NM_003750. | EIF3A  | 2.43E-07 | 8661  | Eukaryotic translation initiation factor 3 subunit A                      | mRNA |
| 4          |        |          |       |                                                                           |      |
| NM_001256  | MCMBP  | 9.53E-05 | 79892 | Minichromosome maintenance complex binding protein, transcript variant 2  | mRNA |
| 378.2      |        |          |       |                                                                           |      |
| XM_017016  | MCMBP  | 1.43E-05 | 79892 | Minichromosome maintenance complex binding protein, transcript variant X2 | mRNA |

|            |             |          |        |                                                                           |        |
|------------|-------------|----------|--------|---------------------------------------------------------------------------|--------|
| 663.1      |             |          |        |                                                                           |        |
| XM_017016  | MCMBP       | 3.05E-06 | 79892  | Minichromosome maintenance complex binding protein, transcript variant X2 | mRNA   |
| 663.1      |             |          |        |                                                                           |        |
| XM_011539  | DMBT1       | 0.019824 | 1755   | Deleted in malignant brain tumors 1, transcript variant X22               | mRNA   |
| 410.3      |             | 4        |        |                                                                           |        |
| NM_001322  | OAT         | 3.40E-13 | 4942   | Ornithine aminotransferase, transcript variant 10                         | mRNA   |
| 974.2      |             |          |        |                                                                           |        |
| NM_001377  | DOCK1       | 0.006074 | 1793   | Dedicator of cytokinesis 1, transcript variant 5                          | mRNA   |
| 546.1      |             | 62       |        |                                                                           |        |
| NM_001290  | DOCK1       | 0.003216 | 1793   | Dedicator of cytokinesis 1, transcript variant 1                          | mRNA   |
| 223.2      |             | 51       |        |                                                                           |        |
| NM_002417. | MKI67       | 3.00E-08 | 4288   | Marker of proliferation Ki-67, transcript variant 1                       | mRNA   |
| 5          |             |          |        |                                                                           |        |
| XR_0029571 | LOC11226806 | 0.011017 | 112268 | Uncharacterized LOC112268067                                              | lnc_RN |
| 07.1       | 7           | 4        | 067    |                                                                           | A      |
| NM_006659. | TUBGCP2     | 0.048575 | 10844  | Tubulin $\gamma$ complex-associated protein 2, transcript variant 2       | mRNA   |
| 4          |             |          |        |                                                                           |        |
| NM_001286  | PHRF1       | 0.000822 | 57661  | PHD and ring finger domains 1, transcript variant 4                       | mRNA   |

|                    |        |                |       |                                                                             |      |
|--------------------|--------|----------------|-------|-----------------------------------------------------------------------------|------|
| 583.2              |        | 568            |       |                                                                             |      |
| XM_011519<br>930.3 | AP2A2  | 3.40E-13       | 161   | Adaptor-related protein complex 2 subunit $\alpha$ 2, transcript variant X2 | mRNA |
| NM_004420.<br>3    | DUSP8  | 0.010431<br>9  | 1850  | Dual specificity phosphatase 8                                              | mRNA |
| XM_024448<br>705.1 | CARS1  | 8.96E-06       | 833   | CysteinyI-tRNA synthetase 1, transcript variant X11                         | mRNA |
| NM_001318<br>065.1 | RRM1   | 0.012354       | 6240  | Ribonucleotide reductase catalytic subunit M1, transcript variant 3         | mRNA |
| NM_001033.<br>5    | RRM1   | 0.038533<br>3  | 6240  | Ribonucleotide reductase catalytic subunit M1, transcript variant 1         | mRNA |
| NM_001286<br>094.2 | TMEM9B | 0.022186<br>4  | 56674 | TMEM9 domain family member B, transcript variant 2                          | mRNA |
| XM_017018<br>375.2 | SBF2   | 0.001106<br>25 | 81846 | SET binding factor 2, transcript variant X7                                 | mRNA |
| NM_001418.<br>4    | EIF4G2 | 0.003393<br>83 | 1982  | Eukaryotic translation initiation factor 4 $\gamma$ 2, transcript variant 1 | mRNA |
| NM_016451.         | COPB1  | 2.16E-07       | 1315  | COPI coat complex subunit $\beta$ 1, transcript variant 1                   | mRNA |

|                    |         |                 |       |                                                                                                    |              |
|--------------------|---------|-----------------|-------|----------------------------------------------------------------------------------------------------|--------------|
| 5                  |         |                 |       |                                                                                                    |              |
| NM_001144<br>061.2 | COPB1   | 0.002538<br>27  | 1315  | COPI coat complex subunit $\beta$ 1, transcript variant 2                                          | mRNA         |
| NM_016451.<br>5    | COPB1   | 0.019824<br>4   | 1315  | COPI coat complex subunit $\beta$ 1, transcript variant 1                                          | mRNA         |
| NM_001321<br>380.2 | PIK3C2A | 0.008685<br>41  | 5286  | Phosphatidylinositol-4-phosphate 3-kinase catalytic subunit type 2 $\alpha$ , transcript variant 3 | mRNA         |
| XM_017018<br>520.2 | NAV2    | 0.000323<br>968 | 89797 | Neuron navigator 2, transcript variant X9                                                          | mRNA         |
| NM_006360.<br>6    | EIF3M   | 0.000400<br>24  | 10480 | Eukaryotic translation initiation factor 3 subunit M, transcript variant 1                         | mRNA         |
| XR_0029571<br>97.1 | QSER1   | 0.003798<br>1   | 79832 | Glutamine and serine-rich 1, transcript variant X5                                                 | misc_R<br>NA |
| NM_001278<br>162.2 | HIPK3   | 0.043385<br>8   | 10114 | Homeodomain interacting protein kinase 3, transcript variant 2                                     | mRNA         |
| NM_145804.<br>3    | ABTB2   | 0.005747<br>95  | 25841 | Ankyrin repeat and BTB domain containing 2                                                         | mRNA         |
| NM_001389          | EXT2    | 0.000618        | 2132  | Exostosin glycosyltransferase 2, transcript variant 4                                              | mRNA         |

|                    |         |                 |       |                                                           |              |
|--------------------|---------|-----------------|-------|-----------------------------------------------------------|--------------|
| 628.1              |         | 347             |       |                                                           |              |
| NM_052854.<br>4    | CREB3L1 | 0.016627<br>6   | 90993 | cAMP responsive element binding protein 3 like 1          | mRNA         |
| NM_001008<br>938.4 | CKAP5   | 1.94E-06        | 9793  | Cytoskeleton associated protein 5, transcript variant 1   | mRNA         |
| NM_014756.<br>4    | CKAP5   | 0.002833<br>12  | 9793  | Cytoskeleton associated protein 5, transcript variant 2   | mRNA         |
| NM_014756.<br>4    | CKAP5   | 0.000358<br>192 | 9793  | Cytoskeleton associated protein 5, transcript variant 2   | mRNA         |
| XM_011520<br>103.2 | LRP4    | 0.007700<br>01  | 4038  | LDL receptor related protein 4, transcript variant X2     | mRNA         |
| XR_0017479<br>08.2 | ACP2    | 0.043385<br>8   | 53    | Acid phosphatase 2, lysosomal, transcript variant X1      | misc_R<br>NA |
| NM_001376<br>648.1 | MADD    | 0.002135<br>81  | 8567  | MAP kinase activating death domain, transcript variant 82 | mRNA         |
| XM_017017<br>105.2 | CELF1   | 7.59E-06        | 10658 | CUGBP Elav-like family member 1, transcript variant X5    | mRNA         |
| XM_017017          | CELF1   | 0.000118        | 10658 | CUGBP Elav-like family member 1, transcript variant X5    | mRNA         |

|                |            |                |               |                                                                     |          |
|----------------|------------|----------------|---------------|---------------------------------------------------------------------|----------|
| 105.2          |            | 363            |               |                                                                     |          |
| NM_015231.2    | NUP160     | 0.048575       | 23279         | Nucleoporin 160, transcript variant 1                               | mRNA     |
| NR_134636.3    | NUP160     | 0.001316<br>87 | 23279         | Nucleoporin 160, transcript variant 3                               | misc_RNA |
| XM_017018085.1 | PTPRJ      | 0.003216<br>51 | 5795          | Protein tyrosine phosphatase receptor type J, transcript variant X3 | mRNA     |
| XM_006718725.3 | TNKS1BP1   | 0.018591<br>3  | 85456         | Tankyrase 1 binding protein 1, transcript variant X1                | mRNA     |
| NR_037646.1    | TMX2-CTND1 | 3.40E-13       | 100528<br>016 | TMX2-CTNND1 readthrough (NMD candidate)                             | lnc_RNA  |
| NM_001206885.2 | CTNND1     | 0.007700<br>01 | 1500          | Catenin $\Delta$ 1, transcript variant 16                           | mRNA     |
| NM_001331.3    | CTNND1     | 0.031976<br>3  | 1500          | Catenin $\Delta$ 1, transcript variant 3                            | mRNA     |
| NM_002556.3    | OSBP       | 0.001169<br>38 | 5007          | Oxysterol-binding protein                                           | mRNA     |
| NM_152716.     | PATL1      | 0.031976       | 219988        | PAT1 homolog 1, processing body mRNA decay factor                   | mRNA     |

|                    |                    |               |               |                                                        |              |
|--------------------|--------------------|---------------|---------------|--------------------------------------------------------|--------------|
| 3                  |                    | 3             |               |                                                        |              |
| NM_001923.<br>5    | DDB1               | 6.01E-05      | 1642          | Damage-specific DNA-binding protein 1                  | mRNA         |
| NM_001923.<br>5    | DDB1               | 3.40E-13      | 1642          | Damage-specific DNA-binding protein 1                  | mRNA         |
| NM_001923.<br>5    | DDB1               | 2.02E-05      | 1642          | Damage-specific DNA-binding protein 1                  | mRNA         |
| NM_001923.<br>5    | DDB1               | 2.40E-06      | 1642          | Damage-specific DNA-binding protein 1                  | mRNA         |
| NM_153611.<br>6    | CYB561A3           | 0.048575      | 220002        | Cytochrome b561 family member A3, transcript variant 2 | mRNA         |
| NM_020238.<br>3    | INCENP             | 0.017620<br>9 | 3619          | Inner centromere protein, transcript variant 2         | mRNA         |
| NR_037946.<br>1    | HNRNPUL2-B<br>SCL2 | 0.011017<br>4 | 100534<br>595 | HNRNPUL2-BSCL2 readthrough (NMD candidate)             | lnc_RN<br>A  |
| XR_0017477<br>24.2 | NXF1               | 0.022186<br>4 | 10482         | Nuclear RNA export factor 1, transcript variant X1     | misc_R<br>NA |
| XM_011545          | PLCB3              | 4.47E-05      | 5331          | Phospholipase C beta 3, transcript variant X1          | mRNA         |

|            |         |          |       |                                                                                         |        |
|------------|---------|----------|-------|-----------------------------------------------------------------------------------------|--------|
| 101.2      |         |          |       |                                                                                         |        |
| XM_011545  | PLCB3   | 0.048575 | 5331  | Phospholipase C beta 3, transcript variant X1                                           | mRNA   |
| 101.2      |         |          |       |                                                                                         |        |
| XM_011544  | ATG2A   | 0.011017 | 23130 | Autophagy-related 2A, transcript variant X6                                             | mRNA   |
| 866.2      |         | 4        |       |                                                                                         |        |
| XM_011544  | ATG2A   | 1.21E-05 | 23130 | Autophagy-related 2A, transcript variant X8                                             | mRNA   |
| 867.3      |         |          |       |                                                                                         |        |
| XM_011545  | SART1   | 0.002538 | 9092  | Spliceosome-associated factor 1, recruiter of U4/U6.U5 tri-snRNP, transcript variant X2 | mRNA   |
| 345.2      |         | 27       |       |                                                                                         |        |
| XM_011544  | SF3B2   | 5.01E-06 | 10992 | Splicing factor 3b subunit 2, transcript variant X2                                     | mRNA   |
| 740.3      |         |          |       |                                                                                         |        |
| NM_001256  | DPP3    | 2.43E-05 | 10072 | Dipeptidyl peptidase 3, transcript variant 3                                            | mRNA   |
| 670.2      |         |          |       |                                                                                         |        |
| NM_001256  | DPP3    | 3.15E-08 | 10072 | Dipeptidyl peptidase 3, transcript variant 3                                            | mRNA   |
| 670.2      |         |          |       |                                                                                         |        |
| XR_0029572 | PITPNM1 | 0.002538 | 9600  | Phosphatidylinositol transfer protein membrane associated 1, transcript variant X4      | misc_R |
| 10.1       |         | 27       |       |                                                                                         | NA     |
| XR_0029572 | PITPNM1 | 0.000125 | 9600  | Phosphatidylinositol transfer protein membrane-associated 1, transcript variant X4      | misc_R |

|                    |          |                 |        |                                                                                 |              |
|--------------------|----------|-----------------|--------|---------------------------------------------------------------------------------|--------------|
| 10.1               |          | 229             |        |                                                                                 | NA           |
| XM_005273<br>994.2 | LRP5     | 4.80E-10        | 4041   | LDL receptor related protein 5, transcript variant X2                           | mRNA         |
| NM_001876.<br>4    | CPT1A    | 0.011664<br>8   | 1374   | Carnitine palmitoyltransferase 1A, transcript variant 1                         | mRNA         |
| XM_011545<br>306.3 | PPFIA1   | 0.009268<br>78  | 8500   | PTPRF interacting protein alpha 1, transcript variant X2                        | mRNA         |
| XM_011545<br>065.2 | NUMA1    | 0.000338<br>213 | 4926   | Nuclear mitotic apparatus protein 1, transcript variant X13                     | mRNA         |
| NR_161388.<br>1    | ARAP1    | 0.004255<br>39  | 116985 | ArfGAP with RhoGAP domain, ankyrin repeat and PH domain 1, transcript variant 6 | misc_R<br>NA |
| NR_161388.<br>1    | ARAP1    | 0.022186<br>4   | 116985 | ArfGAP with RhoGAP domain, ankyrin repeat and PH domain 1, transcript variant 6 | misc_R<br>NA |
| NM_014786.<br>4    | ARHGEF17 | 0.003798<br>1   | 9828   | $\rho$ guanine nucleotide exchange factor 17                                    | mRNA         |
| NM_014752.<br>3    | SPCS2    | 0.045986        | 9789   | Signal peptidase complex subunit 2                                              | mRNA         |
| XM_006718          | AMOTL1   | 0.022186        | 154810 | Angiotensin like-1, transcript variant X4                                       | mRNA         |

|            |          |          |       |                                                                          |          |
|------------|----------|----------|-------|--------------------------------------------------------------------------|----------|
| 772.3      |          | 4        |       |                                                                          |          |
| XM_024448  | PPP2R1B  | 0.031976 | 5519  | Protein phosphatase 2 scaffold subunit A $\beta$ , transcript variant X1 | mRNA     |
| 598.1      |          | 3        |       |                                                                          |          |
| NM_001372  | DLAT     | 0.023692 | 1737  | Dihydrolipoamide S-acetyltransferase, transcript variant 12              | mRNA     |
| 041.1      |          | 5        |       |                                                                          |          |
| XR_428984. | PCSK7    | 0.040914 | 9159  | Proprotein convertase subtilisin/kexin type 7, transcript variant X3     | misc_RNA |
| 4          |          |          |       |                                                                          |          |
| NM_001244  | TMPRSS13 | 0.017620 | 84000 | Transmembrane serine protease 13, transcript variant 4                   | mRNA     |
| 995.2      |          | 9        |       |                                                                          |          |
| NM_004788. | UBE4A    | 0.011664 | 9354  | Ubiquitination factor E4A, transcript variant 1                          | mRNA     |
| 4          |          | 8        |       |                                                                          |          |
| XM_011542  | KMT2A    | 3.87E-06 | 4297  | Lysine methyltransferase 2A, transcript variant X3                       | mRNA     |
| 831.2      |          |          |       |                                                                          |          |
| XM_011542  | KMT2A    | 0.000695 | 4297  | Lysine methyltransferase 2A, transcript variant X3                       | mRNA     |
| 831.2      |          | 991      |       |                                                                          |          |
| NM_001164  | SLC37A4  | 0.026886 | 2542  | Solute carrier family 37 member 4, transcript variant 5                  | mRNA     |
| 280.2      |          | 6        |       |                                                                          |          |
| NM_005188. | CBL      | 0.013087 | 867   | Cbl proto-oncogene                                                       | mRNA     |

|                    |          |                 |        |                                                                     |             |
|--------------------|----------|-----------------|--------|---------------------------------------------------------------------|-------------|
| 4                  |          | 7               |        |                                                                     |             |
| XM_011542<br>720.2 | ARHGEF12 | 0.009859<br>34  | 23365  | ρ guanine nucleotide exchange factor 12, transcript variant X1      | mRNA        |
| NM_003105.<br>6    | SORL1    | 0.038533<br>3   | 6653   | Sortilin related receptor 1                                         | mRNA        |
| NM_003105.<br>6    | SORL1    | 1.52E-05        | 6653   | Sortilin related receptor 1                                         | mRNA        |
| NM_003105.<br>6    | SORL1    | 4.80E-10        | 6653   | Sortilin related receptor 1                                         | mRNA        |
| NM_003105.<br>6    | SORL1    | 0.013087<br>7   | 6653   | Sortilin related receptor 1                                         | mRNA        |
| NR_033839.<br>1    | GSEC     | 0.030044<br>3   | 399972 | G-quadruplex forming sequence containing lncRNA                     | lnc_RN<br>A |
| XM_011543<br>075.2 | ARHGAP32 | 0.000307<br>575 | 9743   | ρ GTPase activating protein 32, transcript variant X6               | mRNA        |
| XM_011543<br>075.2 | ARHGAP32 | 0.048575        | 9743   | ρ GTPase activating protein 32, transcript variant X6               | mRNA        |
| XM_017017          | NFRKB    | 0.004766        | 4798   | Nuclear factor related to κB binding protein, transcript variant X1 | mRNA        |

|                |          |            |        |                                                                            |          |
|----------------|----------|------------|--------|----------------------------------------------------------------------------|----------|
| 793.2          |          | 76         |        |                                                                            |          |
| NR_168393.1    | APLP2    | 0.0300443  | 334    | Amyloid $\beta$ precursor-like protein 2, transcript variant 38            | misc_RNA |
| NM_021978.4    | ST14     | 0.00644537 | 6768   | ST14 transmembrane serine protease matriptase                              | mRNA     |
| NM_021978.4    | ST14     | 1.80E-05   | 6768   | ST14 transmembrane serine protease matriptase                              | mRNA     |
| NM_001372065.1 | NCAPD3   | 0.00358226 | 23310  | Non-SMC condensin II complex subunit D3, transcript variant 3              | mRNA     |
| NM_015261.3    | NCAPD3   | 0.00686488 | 23310  | Non-SMC condensin II complex subunit D3, transcript variant 1              | mRNA     |
| NM_173593.4    | B4GALNT3 | 0.0081583  | 283358 | $\beta$ -1,4-N-acetyl-galactosaminyltransferase 3                          | mRNA     |
| XM_011521008.2 | WNK1     | 5.95E-06   | 65125  | WNK lysine deficient protein kinase 1, transcript variant X18              | mRNA     |
| XM_011520912.3 | TSPAN9   | 0.048575   | 10867  | Tetraspanin 9, transcript variant X1                                       | mRNA     |
| XM_006718      | PLEKHG6  | 0.000987   | 55200  | Pleckstrin homology and RhoGEF domain containing G6, transcript variant X3 | mRNA     |

|                 |         |               |        |                                                         |      |
|-----------------|---------|---------------|--------|---------------------------------------------------------|------|
| 985.3           |         | 21            |        |                                                         |      |
| NM_002342.3     | LTBR    | 2.16E-07      | 4055   | Lymphotoxin $\beta$ receptor, transcript variant 1      | mRNA |
| NM_014865.4     | NCAPD2  | 3.56E-06      | 9918   | Non-SMC condensin I complex subunit D2                  | mRNA |
| NM_014865.4     | NCAPD2  | 0.018591<br>3 | 9918   | Non-SMC condensin I complex subunit D2                  | mRNA |
| NM_014718.4     | CLSTN3  | 0.012354      | 9746   | Calsyntenin 3                                           | mRNA |
| XM_011520.600.2 | PHC1    | 8.56E-06      | 1911   | Polyhomeotic homolog 1, transcript variant X4           | mRNA |
| XM_011520.603.2 | PHC1    | 0.038533<br>3 | 1911   | Polyhomeotic homolog 1, transcript variant X8           | mRNA |
| NM_001025.356.3 | ANO6    | 1.72E-07      | 196527 | Anoctamin 6, transcript variant 1                       | mRNA |
| NM_001278.390.1 | SLC38A1 | 0.011017<br>4 | 81539  | Solute carrier family 38 member 1, transcript variant 6 | mRNA |
| XM_024448       | ARF3    | 0.001786      | 377    | ADP ribosylation factor 3, transcript variant X1        | mRNA |

|                    |         |                 |       |                                                                         |      |
|--------------------|---------|-----------------|-------|-------------------------------------------------------------------------|------|
| 972.1              |         | 4               |       |                                                                         |      |
| XM_011538<br>773.2 | KMT2D   | 1.64E-06        | 8085  | Lysine methyltransferase 2D, transcript variant X4                      | mRNA |
| XM_011538<br>773.2 | KMT2D   | 5.12E-08        | 8085  | Lysine methyltransferase 2D, transcript variant X4                      | mRNA |
| XM_011538<br>773.2 | KMT2D   | 0.009859<br>34  | 8085  | Lysine methyltransferase 2D, transcript variant X4                      | mRNA |
| XM_011538<br>773.2 | KMT2D   | 0.011664<br>8   | 8085  | Lysine methyltransferase 2D, transcript variant X4                      | mRNA |
| XM_017019<br>225.2 | RACGAP1 | 0.009268<br>78  | 29127 | Rac GTPase activating protein 1, transcript variant X8                  | mRNA |
| NM_173602.<br>3    | DIP2B   | 0.000822<br>568 | 57609 | Disco interacting protein 2 homolog B                                   | mRNA |
| NM_173602.<br>3    | DIP2B   | 0.021103<br>3   | 57609 | Disco interacting protein 2 homolog B                                   | mRNA |
| XM_006719<br>214.2 | GALNT6  | 0.001169<br>38  | 11226 | polypeptide N-acetylgalactosaminyltransferase 6, transcript variant X10 | mRNA |
| XM_011539          | ESPL1   | 0.007286        | 9700  | extra spindle pole bodies like 1, separase, transcript variant X2       | mRNA |

|                    |       |                 |       |                                                                      |      |
|--------------------|-------|-----------------|-------|----------------------------------------------------------------------|------|
| 024.2              |       | 68              |       |                                                                      |      |
| NM_002205.<br>5    | ITGA5 | 2.30E-05        | 3678  | integrin subunit alpha 5                                             | mRNA |
| NM_001982.<br>4    | ERBB3 | 0.001578<br>44  | 2065  | erb-b2 receptor tyrosine kinase 3, transcript variant 1              | mRNA |
| XM_011537<br>803.2 | BAZ2A | 3.87E-06        | 11176 | bromodomain adjacent to zinc finger domain 2A, transcript variant X4 | mRNA |
| XM_017019<br>303.1 | LRP1  | 0.011664<br>8   | 4035  | LDL receptor related protein 1, transcript variant X1                | mRNA |
| XM_017019<br>303.1 | LRP1  | 6.76E-05        | 4035  | LDL receptor related protein 1, transcript variant X1                | mRNA |
| XM_017019<br>303.1 | LRP1  | 0.000581<br>772 | 4035  | LDL receptor related protein 1, transcript variant X1                | mRNA |
| XM_017019<br>303.1 | LRP1  | 0.001316<br>87  | 4035  | LDL receptor related protein 1, transcript variant X1                | mRNA |
| XM_017019<br>303.1 | LRP1  | 1.01E-08        | 4035  | LDL receptor related protein 1, transcript variant X1                | mRNA |
| NM_002332.         | LRP1  | 0.005747        | 4035  | LDL receptor related protein 1                                       | mRNA |

|                    |        |                 |       |                                                                      |              |
|--------------------|--------|-----------------|-------|----------------------------------------------------------------------|--------------|
| 3                  |        | 95              |       |                                                                      |              |
| XM_017019<br>303.1 | LRP1   | 0.000931<br>169 | 4035  | LDL receptor related protein 1, transcript variant X1                | mRNA         |
| NM_001351<br>212.2 | R3HDM2 | 0.002833<br>12  | 22864 | R3H domain containing 2, transcript variant 12                       | mRNA         |
| XR_0029573<br>27.1 | MARS1  | 7.63E-09        | 4141  | methionyl-tRNA synthetase 1, transcript variant X2                   | misc_R<br>NA |
| XR_944484.<br>3    | XPOT   | 0.001578<br>44  | 11260 | exportin for tRNA, transcript variant X2                             | misc_R<br>NA |
| NM_002076.<br>4    | GNS    | 9.29E-06        | 2799  | glucosamine (N-acetyl)-6-sulfatase                                   | mRNA         |
| NM_001282<br>610.2 | TMBIM4 | 5.31E-06        | 51643 | transmembrane BAX inhibitor motif containing 4, transcript variant 4 | mRNA         |
| NM_001278<br>354.2 | FRS2   | 0.038533<br>3   | 10818 | fibroblast growth factor receptor substrate 2, transcript variant 5  | mRNA         |
| XR_0017487<br>03.2 | LTA4H  | 0.004022<br>4   | 4048  | leukotriene A4 hydrolase, transcript variant X3                      | misc_R<br>NA |
| NM_001317          | SCYL2  | 3.23E-06        | 55681 | SCY1 like pseudokinase 2, transcript variant 2                       | mRNA         |

|                    |          |                 |        |                                                                             |      |
|--------------------|----------|-----------------|--------|-----------------------------------------------------------------------------|------|
| 784.2              |          |                 |        |                                                                             |      |
| XM_005269<br>004.2 | DRAM1    | 0.023692<br>5   | 55332  | DNA damage regulated autophagy modulator 1, transcript variant X1           | mRNA |
| NM_001363<br>612.2 | TDG      | 0.000482<br>835 | 6996   | thymine DNA glycosylase, transcript variant 2                               | mRNA |
| XM_005268<br>593.1 | PRDM4    | 0.016627<br>6   | 11108  | PR/SET domain 4, transcript variant X1                                      | mRNA |
| NM_014706.<br>4    | SART3    | 6.76E-05        | 9733   | spliceosome associated factor 3, U4/U6 recycling protein                    | mRNA |
| XM_006719<br>682.2 | UBE3B    | 0.048575        | 89910  | ubiquitin protein ligase E3B, transcript variant X4                         | mRNA |
| XM_005253<br>980.3 | ANKRD13A | 0.002663<br>3   | 88455  | ankyrin repeat domain 13A, transcript variant X1                            | mRNA |
| XM_017019<br>394.1 | GPN3     | 0.007700<br>01  | 51184  | GPN-loop GTPase 3, transcript variant X1                                    | mRNA |
| XM_024448<br>869.1 | PPTC7    | 0.019824<br>4   | 160760 | protein phosphatase targeting COQ7, transcript variant X1                   | mRNA |
| XM_017019          | NAA25    | 0.000125        | 80018  | N-alpha-acetyltransferase 25, NatB auxiliary subunit, transcript variant X3 | mRNA |

|                    |        |                |        |                                                                         |      |
|--------------------|--------|----------------|--------|-------------------------------------------------------------------------|------|
| 977.1              |        | 229            |        |                                                                         |      |
| NM_001388<br>303.1 | HECTD4 | 0.004255<br>39 | 283450 | HECT domain E3 ubiquitin protein ligase 4, transcript variant 2         | mRNA |
| NM_001388<br>303.1 | HECTD4 | 2.03E-06       | 283450 | HECT domain E3 ubiquitin protein ligase 4, transcript variant 2         | mRNA |
| NM_001388<br>303.1 | HECTD4 | 0.011444<br>9  | 283450 | HECT domain E3 ubiquitin protein ligase 4, transcript variant 2         | mRNA |
| NM_001388<br>303.1 | HECTD4 | 0.021103<br>3  | 283450 | HECT domain E3 ubiquitin protein ligase 4, transcript variant 2         | mRNA |
| NM_001388<br>303.1 | HECTD4 | 0.005747<br>95 | 283450 | HECT domain E3 ubiquitin protein ligase 4, transcript variant 2         | mRNA |
| NM_080601.<br>3    | PTPN11 | 3.40E-13       | 5781   | protein tyrosine phosphatase non-receptor type 11, transcript variant 2 | mRNA |
| NM_006187.<br>4    | OAS3   | 2.60E-05       | 4940   | 2'-5'-oligoadenylate synthetase 3                                       | mRNA |
| NM_173542.<br>4    | PLBD2  | 0.002401<br>92 | 196463 | phospholipase B domain containing 2, transcript variant 1               | mRNA |
| XM_011538          | MED13L | 0.008685       | 23389  | mediator complex subunit 13L, transcript variant X3                     | mRNA |

|                    |       |                 |        |                                                                       |      |
|--------------------|-------|-----------------|--------|-----------------------------------------------------------------------|------|
| 082.2              |       | 41              |        |                                                                       |      |
| XM_017018<br>736.1 | CIT   | 0.026886<br>6   | 11113  | citron rho-interacting serine/threonine kinase, transcript variant X5 | mRNA |
| NM_006836.<br>2    | GCN1  | 0.048575        | 10985  | GCN1 activator of EIF2AK4                                             | mRNA |
| NM_001002.<br>4    | RPLP0 | 3.40E-13        | 6175   | ribosomal protein lateral stalk subunit P0, transcript variant 1      | mRNA |
| XM_011537<br>925.2 | SPPL3 | 4.78E-09        | 121665 | signal peptide peptidase like 3, transcript variant X1                | mRNA |
| XM_011538<br>875.3 | KDM2B | 0.000452<br>538 | 84678  | lysine demethylase 2B, transcript variant X6                          | mRNA |
| NM_018183.<br>5    | SBNO1 | 0.002273<br>62  | 55206  | strawberry notch homolog 1, transcript variant 2                      | mRNA |
| NM_001167<br>856.3 | SBNO1 | 2.09E-07        | 55206  | strawberry notch homolog 1, transcript variant 1                      | mRNA |
| NM_001167<br>856.3 | SBNO1 | 0.000118<br>363 | 55206  | strawberry notch homolog 1, transcript variant 1                      | mRNA |
| NM_006312.         | NCOR2 | 0.000118        | 9612   | nuclear receptor corepressor 2, transcript variant 1                  | mRNA |

|                |        |             |        |                                                                     |          |
|----------------|--------|-------------|--------|---------------------------------------------------------------------|----------|
| 6              |        | 363         |        |                                                                     |          |
| NR_160422.1    | SCARB1 | 4.47E-05    | 949    | scavenger receptor class B member 1, transcript variant 18          | misc_RNA |
| XR_001748820.1 | DHX37  | 0.00339383  | 57647  | DEAH-box helicase 37, transcript variant X4                         | misc_RNA |
| XM_017020737.1 | ZMYM2  | 0.00201629  | 7750   | zinc finger MYM-type containing 2, transcript variant X12           | mRNA     |
| XM_017020737.1 | ZMYM2  | 0.00190081  | 7750   | zinc finger MYM-type containing 2, transcript variant X12           | mRNA     |
| NM_022459.5    | XPO4   | 0.0342076   | 64328  | exportin 4, transcript variant 1                                    | mRNA     |
| NM_006437.4    | PARP4  | 4.47E-05    | 143    | poly(ADP-ribose) polymerase family member 4                         | mRNA     |
| XM_011534931.1 | PARP4  | 0.000257885 | 143    | poly(ADP-ribose) polymerase family member 4, transcript variant X1  | mRNA     |
| NM_006644.4    | HSPH1  | 0.000105814 | 10808  | heat shock protein family H (Hsp110) member 1, transcript variant 1 | mRNA     |
| NM_001012      | NHLRC3 | 0.013925    | 387921 | NHL repeat containing 3, transcript variant 1                       | mRNA     |

|                    |        |                 |       |                                                                                        |      |
|--------------------|--------|-----------------|-------|----------------------------------------------------------------------------------------|------|
| 754.4              |        | 3               |       |                                                                                        |      |
| XM_011535<br>171.2 | RB1    | 2.02E-05        | 5925  | RB transcriptional corepressor 1, transcript variant X1                                | mRNA |
| XM_011535<br>135.2 | RCBTB1 | 0.028282<br>8   | 55213 | RCC1 and BTB domain containing protein 1, transcript variant X2                        | mRNA |
| XM_011535<br>135.2 | RCBTB1 | 0.015633<br>2   | 55213 | RCC1 and BTB domain containing protein 1, transcript variant X2                        | mRNA |
| NM_001322<br>349.2 | DIS3   | 0.000169<br>724 | 22894 | DIS3 homolog, exosome endoribonuclease and 3'-5' exoribonuclease, transcript variant 4 | mRNA |
| XM_006719<br>785.3 | MYCBP2 | 0.000777<br>792 | 23077 | MYC binding protein 2, transcript variant X10                                          | mRNA |
| XM_017020<br>464.2 | MYCBP2 | 0.000290<br>692 | 23077 | MYC binding protein 2, transcript variant X23                                          | mRNA |
| XM_011535<br>185.3 | RBM26  | 0.004255<br>39  | 64062 | RNA binding motif protein 26, transcript variant X13                                   | mRNA |
| XM_005254<br>053.3 | IPO5   | 0.001484<br>02  | 3843  | importin 5, transcript variant X7                                                      | mRNA |
| NM_001366          | DOCK9  | 0.000380        | 23348 | dedicator of cytokinesis 9, transcript variant 14                                      | mRNA |

|            |       |          |       |                                                                   |          |
|------------|-------|----------|-------|-------------------------------------------------------------------|----------|
| 684.2      |       | 287      |       |                                                                   |          |
| NM_001366  | DOCK9 | 0.040914 | 23348 | dedicator of cytokinesis 9, transcript variant 14                 | mRNA     |
| 684.2      |       |          |       |                                                                   |          |
| XM_005254  | TPP2  | 0.038533 | 7174  | tripeptidyl peptidase 2, transcript variant X1                    | mRNA     |
| 070.2      |       | 3        |       |                                                                   |          |
| NM_001354  | CUL4A | 0.002663 | 8451  | cullin 4A, transcript variant 7                                   | mRNA     |
| 940.2      |       | 3        |       |                                                                   |          |
| NM_138376. | TTC5  | 0.028282 | 91875 | tetratricopeptide repeat domain 5                                 | mRNA     |
| 3          |       | 8        |       |                                                                   |          |
| XR_0017505 | TEP1  | 0.007286 | 7011  | telomerase associated protein 1, transcript variant X2            | misc_RNA |
| 31.1       |       | 68       |       |                                                                   |          |
| NM_007110. | TEP1  | 0.003798 | 7011  | telomerase associated protein 1, transcript variant 1             | mRNA     |
| 5          |       | 1        |       |                                                                   |          |
| NM_001170  | CHD8  | 0.013087 | 57680 | chromodomain helicase DNA binding protein 8, transcript variant 1 | mRNA     |
| 629.2      |       | 7        |       |                                                                   |          |
| NM_020920. | CHD8  | 6.01E-05 | 57680 | chromodomain helicase DNA binding protein 8, transcript variant 2 | mRNA     |
| 4          |       |          |       |                                                                   |          |
| NM_004995. | MMP14 | 0.002135 | 4323  | matrix metalloproteinase 14                                       | mRNA     |

|                    |          |                 |        |                                                                                |        |
|--------------------|----------|-----------------|--------|--------------------------------------------------------------------------------|--------|
| 4                  |          | 81              |        |                                                                                |        |
| XM_011536<br>526.2 | NOP9     | 0.043385<br>8   | 161424 | NOP9 nucleolar protein, transcript variant X2                                  | mRNA   |
| XM_024449<br>526.1 | HECTD1   | 0.036449<br>2   | 25831  | HECT domain E3 ubiquitin protein ligase 1, transcript variant X2               | mRNA   |
| NM_015473.<br>4    | HEATR5A  | 0.004022<br>4   | 25938  | HEAT repeat containing 5A                                                      | mRNA   |
| XM_006720<br>099.3 | RALGAPA1 | 0.040914        | 253959 | Ral GTPase activating protein catalytic subunit alpha 1, transcript variant X2 | mRNA   |
| XM_005267<br>262.2 | SEC23A   | 0.000105<br>814 | 10484  | SEC23 homolog A, COPII coat complex component, transcript variant X1           | mRNA   |
| NM_001354<br>139.2 | MIA2     | 0.005747<br>95  | 4253   | MIA SH3 domain ER export factor 2, transcript variant 12                       | mRNA   |
| NM_001008<br>396.3 | WDHD1    | 0.031976<br>3   | 11169  | WD repeat and HMG-box DNA binding protein 1, transcript variant 2              | mRNA   |
| XM_017021<br>840.2 | DLGAP5   | 0.002663<br>3   | 9787   | DLG associated protein 5, transcript variant X1                                | mRNA   |
| NR_073128.         | KTN1     | 0.000740        | 3895   | kinectin 1, transcript variant 6                                               | misc_R |

|                    |          |                |               |                                                                                                                       |         |
|--------------------|----------|----------------|---------------|-----------------------------------------------------------------------------------------------------------------------|---------|
| 1                  |          | 067            |               |                                                                                                                       | NA      |
| XM_006720<br>138.2 | KTN1     | 0.010431<br>9  | 3895          | kinectin 1, transcript variant X1                                                                                     | mRNA    |
| XR_943916.<br>3    | PCNX4-DT | 0.006074<br>62 | 105370<br>524 | PCNX4 divergent transcript, transcript variant X1                                                                     | lnc_RNA |
| XM_005267<br>458.1 | SYNE2    | 0.001169<br>38 | 23224         | spectrin repeat containing nuclear envelope protein 2, transcript variant X14                                         | mRNA    |
| XM_005267<br>458.1 | SYNE2    | 0.045986       | 23224         | spectrin repeat containing nuclear envelope protein 2, transcript variant X14                                         | mRNA    |
| XM_005267<br>458.1 | SYNE2    | 0.004766<br>76 | 23224         | spectrin repeat containing nuclear envelope protein 2, transcript variant X14                                         | mRNA    |
| NM_005956.<br>4    | MTHFD1   | 8.06E-06       | 4522          | methylenetetrahydrofolate dehydrogenase, cyclohydrolase and formyltetrahydrofolate synthetase 1, transcript variant 1 | mRNA    |
| XM_017021<br>156.2 | PLEKHG3  | 7.11E-06       | 26030         | pleckstrin homology and RhoGEF domain containing G3, transcript variant X7                                            | mRNA    |
| XM_011537<br>265.2 | ACTN1    | 1.90E-07       | 87            | actinin alpha 1, transcript variant X7                                                                                | mRNA    |
| XM_017021          | ACTN1    | 0.001484       | 87            | actinin alpha 1, transcript variant X2                                                                                | mRNA    |

|                |        |                 |       |                                                                          |      |
|----------------|--------|-----------------|-------|--------------------------------------------------------------------------|------|
| 721.2          |        | 02              |       |                                                                          |      |
| NM_014734.4    | SUSD6  | 0.002135<br>81  | 9766  | sushi domain containing 6                                                | mRNA |
| XM_017021097.1 | PCNX1  | 0.000118<br>363 | 22990 | pecanex 1, transcript variant X13                                        | mRNA |
| NM_001367710.1 | MIDEAS | 0.010431<br>9   | 91748 | mitotic deacetylase associated SANT domain protein, transcript variant 3 | mRNA |
| NM_001043318.3 | MIDEAS | 0.000105<br>814 | 91748 | mitotic deacetylase associated SANT domain protein, transcript variant 2 | mRNA |
| XM_006720344.3 | AREL1  | 0.006445<br>37  | 9870  | apoptosis resistant E3 ubiquitin protein ligase 1, transcript variant X2 | mRNA |
| NM_001329238.2 | NEK9   | 0.011664<br>8   | 91754 | NIMA related kinase 9, transcript variant 3                              | mRNA |
| NM_005065.6    | SEL1L  | 0.008685<br>41  | 6400  | SEL1L adaptor subunit of ERAD E3 ubiquitin ligase, transcript variant 1  | mRNA |
| XM_005267988.3 | SEL1L  | 0.038533<br>3   | 6400  | SEL1L adaptor subunit of ERAD E3 ubiquitin ligase, transcript variant X1 | mRNA |
| XM_005267      | SEL1L  | 0.011017        | 6400  | SEL1L adaptor subunit of ERAD E3 ubiquitin ligase, transcript variant X1 | mRNA |

|            |         |          |        |                                                                          |      |
|------------|---------|----------|--------|--------------------------------------------------------------------------|------|
| 988.3      |         | 4        |        |                                                                          |      |
| XM_005267  | SEL1L   | 0.007286 | 6400   | SEL1L adaptor subunit of ERAD E3 ubiquitin ligase, transcript variant X2 | mRNA |
| 989.4      |         | 68       |        |                                                                          |      |
| NM_001326  | ZC3H14  | 0.000931 | 79882  | zinc finger CCCH-type containing 14, transcript variant 8                | mRNA |
| 296.2      |         | 169      |        |                                                                          |      |
| NM_001128  | TC2N    | 0.000618 | 123036 | tandem C2 domains, nuclear, transcript variant 2                         | mRNA |
| 595.3      |         | 347      |        |                                                                          |      |
| XM_011536  | BTBD7   | 8.48E-05 | 55727  | BTB domain containing 7, transcript variant X1                           | mRNA |
| 939.2      |         |          |        |                                                                          |      |
| NM_001195  | DICER1  | 0.038533 | 23405  | dicer 1, ribonuclease III, transcript variant 3                          | mRNA |
| 573.1      |         | 3        |        |                                                                          |      |
| XM_017021  | DICER1  | 0.004497 | 23405  | dicer 1, ribonuclease III, transcript variant X7                         | mRNA |
| 122.2      |         | 29       |        |                                                                          |      |
| NM_018036. | ATG2B   | 0.036449 | 55102  | autophagy related 2B                                                     | mRNA |
| 7          |         | 2        |        |                                                                          |      |
| NM_001376. | DYNC1H1 | 3.23E-06 | 1778   | dynein cytoplasmic 1 heavy chain 1                                       | mRNA |
| 5          |         |          |        |                                                                          |      |
| NM_001376. | DYNC1H1 | 5.31E-06 | 1778   | dynein cytoplasmic 1 heavy chain 1                                       | mRNA |

|            |         |          |        |                                                              |      |
|------------|---------|----------|--------|--------------------------------------------------------------|------|
| 5          |         |          |        |                                                              |      |
| NM_001376. | DYNC1H1 | 0.025326 | 1778   | dynein cytoplasmic 1 heavy chain 1                           | mRNA |
| 5          |         | 2        |        |                                                              |      |
| NM_001376. | DYNC1H1 | 3.40E-13 | 1778   | dynein cytoplasmic 1 heavy chain 1                           | mRNA |
| 5          |         |          |        |                                                              |      |
| NM_001394  | KLC1    | 0.004255 | 3831   | kinesin light chain 1, transcript variant 12                 | mRNA |
| 840.1      |         | 39       |        |                                                              |      |
| NM_001382  | AKT1    | 0.019824 | 207    | AKT serine/threonine kinase 1, transcript variant 7          | mRNA |
| 433.1      |         | 4        |        |                                                              |      |
| NM_001350  | AHNAK2  | 7.51E-05 | 113146 | AHNAK nucleoprotein 2, transcript variant 2                  | mRNA |
| 929.2      |         |          |        |                                                              |      |
| NM_001324  | CYFIP1  | 0.000133 | 23191  | cytoplasmic FMR1 interacting protein 1, transcript variant 9 | mRNA |
| 122.3      |         | 274      |        |                                                              |      |
| NM_001324  | CYFIP1  | 3.40E-13 | 23191  | cytoplasmic FMR1 interacting protein 1, transcript variant 9 | mRNA |
| 122.3      |         |          |        |                                                              |      |
| NM_001324  | CYFIP1  | 1.49E-09 | 23191  | cytoplasmic FMR1 interacting protein 1, transcript variant 9 | mRNA |
| 122.3      |         |          |        |                                                              |      |
| NM_001324  | CYFIP1  | 1.64E-07 | 23191  | cytoplasmic FMR1 interacting protein 1, transcript variant 9 | mRNA |

|                    |           |                 |       |                                                                                     |      |
|--------------------|-----------|-----------------|-------|-------------------------------------------------------------------------------------|------|
| 122.3              |           |                 |       |                                                                                     |      |
| NM_001324<br>119.2 | CYFIP1    | 0.018591<br>3   | 23191 | cytoplasmic FMR1 interacting protein 1, transcript variant 5                        | mRNA |
| NM_004667.<br>6    | HERC2     | 1.90E-07        | 8924  | HECT and RLD domain containing E3 ubiquitin protein ligase 2                        | mRNA |
| XM_005268<br>276.5 | HERC2     | 0.002663<br>3   | 8924  | HECT and RLD domain containing E3 ubiquitin protein ligase 2, transcript variant X3 | mRNA |
| XM_005268<br>276.5 | HERC2     | 0.016627<br>6   | 8924  | HECT and RLD domain containing E3 ubiquitin protein ligase 2, transcript variant X3 | mRNA |
| NM_004667.<br>6    | HERC2     | 0.001106<br>25  | 8924  | HECT and RLD domain containing E3 ubiquitin protein ligase 2                        | mRNA |
| NM_004667.<br>6    | HERC2     | 0.000212<br>686 | 8924  | HECT and RLD domain containing E3 ubiquitin protein ligase 2                        | mRNA |
| NM_199357.<br>3    | ARHGAP11A | 0.001578<br>44  | 9824  | Rho GTPase activating protein 11A, transcript variant 2                             | mRNA |
| NM_020154.<br>3    | EMC7      | 0.000118<br>363 | 56851 | ER membrane protein complex subunit 7                                               | mRNA |
| NM_014691.         | AQR       | 0.008685        | 9716  | aquarius intron-binding spliceosomal factor                                         | mRNA |

|                    |          |                 |        |                                                                             |         |
|--------------------|----------|-----------------|--------|-----------------------------------------------------------------------------|---------|
| 3                  |          | 41              |        |                                                                             |         |
| NM_001013<br>703.4 | EIF2AK4  | 3.69E-06        | 440275 | eukaryotic translation initiation factor 2 alpha kinase 4                   | mRNA    |
| NM_001013<br>703.4 | EIF2AK4  | 0.002016<br>29  | 440275 | eukaryotic translation initiation factor 2 alpha kinase 4                   | mRNA    |
| NR_152822.<br>1    | OIP5-AS1 | 0.000777<br>792 | 729082 | OIP5 antisense RNA 1, transcript variant 4                                  | lnc_RNA |
| NM_153260.<br>3    | LRRC57   | 0.014848<br>8   | 255252 | leucine rich repeat containing 57                                           | mRNA    |
| XM_011521<br>986.3 | TP53BP1  | 0.006445<br>37  | 7158   | tumor protein p53 binding protein 1, transcript variant X3                  | mRNA    |
| XM_005254<br>722.3 | SPPL2A   | 1.64E-06        | 84888  | signal peptide peptidase like 2A, transcript variant X1                     | mRNA    |
| NM_014547.<br>5    | TMOD3    | 0.009715<br>63  | 29766  | tropomodulin 3                                                              | mRNA    |
| XM_005254<br>537.3 | MAPK6    | 0.036449<br>2   | 5597   | mitogen-activated protein kinase 6, transcript variant X1                   | mRNA    |
| NM_001018          | ICE2     | 0.021103        | 79664  | interactor of little elongation complex ELL subunit 2, transcript variant 2 | mRNA    |

|                    |        |                 |       |                                                                                                   |              |
|--------------------|--------|-----------------|-------|---------------------------------------------------------------------------------------------------|--------------|
| 089.3              |        | 3               |       |                                                                                                   |              |
| NM_018080.<br>4    | VPS13C | 0.000178<br>792 | 54832 | vacuolar protein sorting 13 homolog C, transcript variant 1B                                      | mRNA         |
| NM_018080.<br>4    | VPS13C | 0.043385<br>8   | 54832 | vacuolar protein sorting 13 homolog C, transcript variant 1B                                      | mRNA         |
| NM_018080.<br>4    | VPS13C | 0.001039<br>18  | 54832 | vacuolar protein sorting 13 homolog C, transcript variant 1B                                      | mRNA         |
| XR_0017513<br>32.1 | VPS13C | 0.016627<br>6   | 54832 | vacuolar protein sorting 13 homolog C, transcript variant X1                                      | misc_R<br>NA |
| NM_018080.<br>4    | VPS13C | 0.007700<br>01  | 54832 | vacuolar protein sorting 13 homolog C, transcript variant 1B                                      | mRNA         |
| NM_018080.<br>4    | VPS13C | 0.025326<br>2   | 54832 | vacuolar protein sorting 13 homolog C, transcript variant 1B                                      | mRNA         |
| XM_017022<br>666.1 | TLN2   | 0.001316<br>87  | 83660 | talin 2, transcript variant X7                                                                    | mRNA         |
| XM_017022<br>701.2 | HERC1  | 0.000581<br>772 | 8925  | HECT and RLD domain containing E3 ubiquitin protein ligase family member 1, transcript variant X3 | mRNA         |
| XM_017022          | HERC1  | 0.026886        | 8925  | HECT and RLD domain containing E3 ubiquitin protein ligase family member 1, transcript            | mRNA         |

|                    |        |                |       |                                                                                        |      |
|--------------------|--------|----------------|-------|----------------------------------------------------------------------------------------|------|
| 701.2              |        | 6              |       | variant X3                                                                             |      |
| XM_011521<br>164.3 | CLPX   | 0.018591<br>3  | 10845 | caseinolytic mitochondrial matrix peptidase chaperone subunit X, transcript variant X1 | mRNA |
| NM_001287<br>823.2 | ZWILCH | 0.006074<br>62 | 55055 | zwilch kinetochore protein, transcript variant 4                                       | mRNA |
| XM_024450<br>053.1 | AAGAB  | 0.048575       | 79719 | alpha and gamma adaptin binding protein, transcript variant X3                         | mRNA |
| NM_004856.<br>7    | KIF23  | 0.030044<br>3  | 9493  | kinesin family member 23, transcript variant 2                                         | mRNA |
| NM_001282<br>980.2 | TLE3   | 4.80E-10       | 7090  | TLE family member 3, transcriptional corepressor, transcript variant 4                 | mRNA |
| NM_001320<br>941.2 | IREB2  | 0.003798<br>1  | 3658  | iron responsive element binding protein 2, transcript variant 2                        | mRNA |
| NM_004136.<br>4    | IREB2  | 0.010431<br>9  | 3658  | iron responsive element binding protein 2, transcript variant 1                        | mRNA |
| XM_011521<br>764.2 | FANCI  | 0.011017<br>4  | 55215 | FA complementation group I, transcript variant X3                                      | mRNA |
| NM_001113          | FANCI  | 0.003582       | 55215 | FA complementation group I, transcript variant 1                                       | mRNA |

|            |        |          |       |                                                                      |          |
|------------|--------|----------|-------|----------------------------------------------------------------------|----------|
| 378.2      |        | 26       |       |                                                                      |          |
| NM_001113  | FANCI  | 0.019824 | 55215 | FA complementation group I, transcript variant 1                     | mRNA     |
| 378.2      |        | 4        |       |                                                                      |          |
| NM_020210. | SEMA4B | 0.002833 | 10509 | semaphorin 4B, transcript variant 1                                  | mRNA     |
| 5          |        | 12       |       |                                                                      |          |
| NM_001324  | SEMA4B | 0.004766 | 10509 | semaphorin 4B, transcript variant 4                                  | mRNA     |
| 030.3      |        | 76       |       |                                                                      |          |
| NM_003870. | IQGAP1 | 0.000150 | 8826  | IQ motif containing GTPase activating protein 1                      | mRNA     |
| 4          |        | 569      |       |                                                                      |          |
| NM_003870. | IQGAP1 | 0.000581 | 8826  | IQ motif containing GTPase activating protein 1                      | mRNA     |
| 4          |        | 772      |       |                                                                      |          |
| NR_168464. | FURIN  | 1.94E-06 | 5045  | furin, paired basic amino acid cleaving enzyme, transcript variant 8 | misc_RNA |
| 1          |        |          |       |                                                                      |          |
| NM_001271. | CHD2   | 0.003798 | 1106  | chromodomain helicase DNA binding protein 2, transcript variant 1    | mRNA     |
| 4          |        | 1        |       |                                                                      |          |
| NM_001271. | CHD2   | 0.004497 | 1106  | chromodomain helicase DNA binding protein 2, transcript variant 1    | mRNA     |
| 4          |        | 29       |       |                                                                      |          |
| NM_021259. | PGAP6  | 1.59E-05 | 58986 | post-glycosylphosphatidylinositol attachment to proteins 6           | mRNA     |

|                    |                 |                 |               |                                                                                       |              |
|--------------------|-----------------|-----------------|---------------|---------------------------------------------------------------------------------------|--------------|
| 3                  |                 |                 |               |                                                                                       |              |
| XM_024450<br>299.1 | PKD1            | 0.038533<br>3   | 5310          | polycystin 1, transient receptor potential channel interacting, transcript variant X4 | mRNA         |
| NM_001761.<br>3    | CCNF            | 0.038533<br>3   | 899           | cyclin F, transcript variant 1                                                        | mRNA         |
| XR_0029577<br>96.1 | SRRM2           | 0.026886<br>6   | 23524         | serine/arginine repetitive matrix 2, transcript variant X13                           | misc_R<br>NA |
| NM_001318<br>918.2 | GLIS2           | 0.000323<br>968 | 84662         | GLIS family zinc finger 2, transcript variant 2                                       | mRNA         |
| NM_001351<br>729.2 | CORO7           | 0.013087<br>7   | 79585         | coronin 7, transcript variant 4                                                       | mRNA         |
| NM_001201<br>479.2 | CORO7-PAM1<br>6 | 0.018591<br>3   | 100529<br>144 | CORO7-PAM16 readthrough                                                               | mRNA         |
| NM_002705.<br>5    | PPL             | 6.76E-05        | 5493          | periplakin                                                                            | mRNA         |
| NM_002705.<br>5    | PPL             | 0.002401<br>92  | 5493          | periplakin                                                                            | mRNA         |
| XM_017023          | PPL             | 3.40E-13        | 5493          | periplakin, transcript variant X2                                                     | mRNA         |

|                    |         |                 |       |                                                                                   |              |
|--------------------|---------|-----------------|-------|-----------------------------------------------------------------------------------|--------------|
| 375.2              |         |                 |       |                                                                                   |              |
| NM_002705.<br>5    | PPL     | 0.000105<br>814 | 5493  | periplakin                                                                        | mRNA         |
| NM_002705.<br>5    | PPL     | 0.004255<br>39  | 5493  | periplakin                                                                        | mRNA         |
| XR_932882.<br>3    | ALG1    | 0.031976<br>3   | 56052 | ALG1 chitobiosyldiphosphodolichol beta-mannosyltransferase, transcript variant X3 | misc_R<br>NA |
| NM_003470.<br>3    | USP7    | 2.87E-07        | 7874  | ubiquitin specific peptidase 7, transcript variant 1                              | mRNA         |
| XM_017023<br>705.2 | ATF7IP2 | 0.005079<br>4   | 80063 | activating transcription factor 7 interacting protein 2, transcript variant X1    | mRNA         |
| NM_014287.<br>4    | NOMO1   | 0.001900<br>81  | 23420 | NODAL modulator 1                                                                 | mRNA         |
| NM_014287.<br>4    | NOMO1   | 0.034207<br>6   | 23420 | NODAL modulator 1                                                                 | mRNA         |
| NM_014287.<br>4    | NOMO1   | 0.000178<br>792 | 23420 | NODAL modulator 1                                                                 | mRNA         |
| NM_001324          | PDXDC1  | 0.000105        | 23042 | pyridoxal dependent decarboxylase domain containing 1, transcript variant 8       | mRNA         |

|                    |        |                 |        |                                                                                         |              |
|--------------------|--------|-----------------|--------|-----------------------------------------------------------------------------------------|--------------|
| 019.2              |        | 814             |        |                                                                                         |              |
| XM_005255<br>706.2 | MARF1  | 0.003216<br>51  | 9665   | meiosis regulator and mRNA stability factor 1, transcript variant X4                    | mRNA         |
| XM_005255<br>706.2 | MARF1  | 0.001676<br>3   | 9665   | meiosis regulator and mRNA stability factor 1, transcript variant X4                    | mRNA         |
| NM_004996.<br>4    | ABCC1  | 0.013087<br>7   | 4363   | ATP binding cassette subfamily C member 1                                               | mRNA         |
| NM_004996.<br>4    | ABCC1  | 0.006864<br>88  | 4363   | ATP binding cassette subfamily C member 1                                               | mRNA         |
| NR_036447.<br>1    | PKD1P1 | 0.015633<br>2   | 339044 | polycystin 1, transient receptor potential channel interacting pseudogene 1             | misc_R<br>NA |
| XM_017023<br>156.2 | NOMO2  | 1.16E-08        | 283820 | NODAL modulator 2, transcript variant X1                                                | mRNA         |
| XM_017023<br>156.2 | NOMO2  | 0.000695<br>991 | 283820 | NODAL modulator 2, transcript variant X1                                                | mRNA         |
| XM_017023<br>066.2 | SMG1   | 0.002833<br>12  | 23049  | SMG1 nonsense mediated mRNA decay associated PI3K related kinase, transcript variant X4 | mRNA         |
| XM_024450          | SMG1   | 0.045986        | 23049  | SMG1 nonsense mediated mRNA decay associated PI3K related kinase, transcript variant X6 | mRNA         |

|                    |        |                 |       |                                                                                              |      |
|--------------------|--------|-----------------|-------|----------------------------------------------------------------------------------------------|------|
| 198.1              |        |                 |       |                                                                                              |      |
| NM_001258<br>034.2 | POLR3E | 0.001169<br>38  | 55718 | RNA polymerase III subunit E, transcript variant 4                                           | mRNA |
| XM_024450<br>200.1 | GGA2   | 0.031976<br>3   | 23062 | golgi associated, gamma adaptin ear containing, ARF binding protein 2, transcript variant X1 | mRNA |
| XM_017023<br>144.2 | TNRC6A | 5.95E-06        | 27327 | trinucleotide repeat containing adaptor 6A, transcript variant X2                            | mRNA |
| XM_017023<br>188.2 | GTF3C1 | 0.000931<br>169 | 2975  | general transcription factor IIIC subunit 1, transcript variant X1                           | mRNA |
| XM_005255<br>198.2 | XPO6   | 0.005747<br>95  | 23214 | exportin 6, transcript variant X3                                                            | mRNA |
| NM_005115.<br>5    | MVP    | 2.54E-06        | 9961  | major vault protein, transcript variant 2                                                    | mRNA |
| NM_005115.<br>5    | MVP    | 0.002663<br>3   | 9961  | major vault protein, transcript variant 2                                                    | mRNA |
| NM_001243<br>332.2 | SEZ6L2 | 0.000510<br>829 | 26470 | seizure related 6 homolog like 2, transcript variant 5                                       | mRNA |
| NM_006662.         | SRCAP  | 0.000118        | 10847 | Snf2 related CREBBP activator protein                                                        | mRNA |

|                    |         |                |       |                                                                    |      |
|--------------------|---------|----------------|-------|--------------------------------------------------------------------|------|
| 3                  |         | 363            |       |                                                                    |      |
| NM_001031<br>835.3 | PHKB    | 0.010431<br>9  | 5257  | phosphorylase kinase regulatory subunit beta, transcript variant 2 | mRNA |
| NM_001363<br>837.1 | PHKB    | 0.004255<br>39 | 5257  | phosphorylase kinase regulatory subunit beta, transcript variant 3 | mRNA |
| NM_001323<br>511.2 | AMFR    | 0.000400<br>24 | 267   | autocrine motility factor receptor, transcript variant 5           | mRNA |
| NM_001323<br>512.2 | AMFR    | 0.022186<br>4  | 267   | autocrine motility factor receptor, transcript variant 4           | mRNA |
| NM_001377<br>456.1 | BBS2    | 0.007700<br>01 | 583   | Bardet-Biedl syndrome 2, transcript variant 2                      | mRNA |
| NM_002428.<br>4    | MMP15   | 7.63E-09       | 4324  | matrix metalloproteinase 15                                        | mRNA |
| NM_002428.<br>4    | MMP15   | 1.35E-05       | 4324  | matrix metalloproteinase 15                                        | mRNA |
| XM_017022<br>945.2 | CSNK2A2 | 1.14E-07       | 1459  | casein kinase 2 alpha 2, transcript variant X2                     | mRNA |
| NM_016284.         | CNOT1   | 0.000338       | 23019 | CCR4-NOT transcription complex subunit 1, transcript variant 1     | mRNA |

|                    |          |                 |        |                                                                              |              |
|--------------------|----------|-----------------|--------|------------------------------------------------------------------------------|--------------|
| 5                  |          | 213             |        |                                                                              |              |
| NR_049763.<br>2    | CNOT1    | 4.80E-10        | 23019  | CCR4-NOT transcription complex subunit 1, transcript variant 4               | misc_R<br>NA |
| NM_002080.<br>4    | GOT2     | 0.000987<br>21  | 2806   | glutamic-oxaloacetic transaminase 2, transcript variant 1                    | mRNA         |
| NM_006141.<br>3    | DYNC1LI2 | 0.000338<br>213 | 1783   | dynein cytoplasmic 1 light intermediate chain 2, transcript variant 1        | mRNA         |
| NM_001191<br>022.2 | CTCF     | 7.11E-05        | 10664  | CCCTC-binding factor, transcript variant 2                                   | mRNA         |
| NM_001145<br>961.2 | SLC12A4  | 0.000338<br>213 | 6560   | solute carrier family 12 member 4, transcript variant 2                      | mRNA         |
| XM_017023<br>387.1 | PDPR     | 0.013087<br>7   | 55066  | pyruvate dehydrogenase phosphatase regulatory subunit, transcript variant X3 | mRNA         |
| NM_058219.<br>3    | EXOSC6   | 0.000133<br>274 | 118460 | exosome component 6                                                          | mRNA         |
| XR_933220.<br>3    | AARS1    | 0.018591<br>3   | 16     | alanyl-tRNA synthetase 1, transcript variant X1                              | misc_R<br>NA |
| NM_001605.         | AARS1    | 1.85E-06        | 16     | alanyl-tRNA synthetase 1                                                     | mRNA         |

|                    |        |                 |        |                                                       |        |
|--------------------|--------|-----------------|--------|-------------------------------------------------------|--------|
| 3                  |        |                 |        |                                                       |        |
| NM_012426.<br>5    | SF3B3  | 0.011017<br>4   | 23450  | splicing factor 3b subunit 3                          | mRNA   |
| NM_012426.<br>5    | SF3B3  | 0.045986        | 23450  | splicing factor 3b subunit 3                          | mRNA   |
| NM_012426.<br>5    | SF3B3  | 0.048575        | 23450  | splicing factor 3b subunit 3                          | mRNA   |
| NM_012426.<br>5    | SF3B3  | 0.000141<br>056 | 23450  | splicing factor 3b subunit 3                          | mRNA   |
| XM_017023<br>880.2 | MTSS2  | 0.018591<br>3   | 92154  | MTSS I-BAR domain containing 2, transcript variant X4 | mRNA   |
| NM_001137<br>675.4 | ATXN1L | 0.036449<br>2   | 342371 | ataxin 1 like                                         | mRNA   |
| XM_011523<br>484.2 | DHX38  | 0.028282<br>8   | 9785   | DEAH-box helicase 38, transcript variant X2           | mRNA   |
| XM_011523<br>484.2 | DHX38  | 0.016627<br>6   | 9785   | DEAH-box helicase 38, transcript variant X2           | mRNA   |
| NR_027265.         | GLG1   | 0.000400        | 2734   | golgi glycoprotein 1, transcript variant 5            | misc_R |

|                    |        |                 |       |                                                         |      |
|--------------------|--------|-----------------|-------|---------------------------------------------------------|------|
| 2                  |        | 24              |       |                                                         | NA   |
| NM_012201.<br>6    | GLG1   | 0.000187<br>923 | 2734  | golgi glycoprotein 1, transcript variant 1              | mRNA |
| XM_011523<br>352.1 | CMIP   | 2.71E-06        | 80790 | c-Maf inducing protein, transcript variant X1           | mRNA |
| NM_030629.<br>3    | CMIP   | 0.000740<br>067 | 80790 | c-Maf inducing protein, transcript variant 2            | mRNA |
| XM_017023<br>735.1 | SLC7A5 | 0.028282<br>8   | 8140  | solute carrier family 7 member 5, transcript variant X1 | mRNA |
| NM_006086.<br>4    | TUBB3  | 0.000323<br>968 | 10381 | tubulin beta 3 class III, transcript variant 1          | mRNA |
| XM_024450<br>769.1 | MYO1C  | 0.004766<br>76  | 4641  | myosin IC, transcript variant X3                        | mRNA |
| NM_033375.<br>5    | MYO1C  | 1.47E-07        | 4641  | myosin IC, transcript variant 3                         | mRNA |
| XM_024450<br>769.1 | MYO1C  | 0.001484<br>02  | 4641  | myosin IC, transcript variant X3                        | mRNA |
| XM_024450          | PRPF8  | 3.40E-13        | 10594 | pre-mRNA processing factor 8, transcript variant X1     | mRNA |

|                |         |             |       |                                                                            |      |
|----------------|---------|-------------|-------|----------------------------------------------------------------------------|------|
| 537.1          |         |             |       |                                                                            |      |
| NM_006445.4    | PRPF8   | 3.40E-13    | 10594 | pre-mRNA processing factor 8                                               | mRNA |
| XM_005256561.2 | ZZEF1   | 0.0156332   | 23140 | zinc finger ZZ-type and EF-hand domain containing 1, transcript variant X3 | mRNA |
| XM_005256561.2 | ZZEF1   | 2.02E-05    | 23140 | zinc finger ZZ-type and EF-hand domain containing 1, transcript variant X3 | mRNA |
| XM_005256561.2 | ZZEF1   | 0.000273438 | 23140 | zinc finger ZZ-type and EF-hand domain containing 1, transcript variant X3 | mRNA |
| XM_017024733.1 | ANKFY1  | 0.0253262   | 51479 | ankyrin repeat and FYVE domain containing 1, transcript variant X1         | mRNA |
| XM_011523928.2 | ANKFY1  | 4.60E-10    | 51479 | ankyrin repeat and FYVE domain containing 1, transcript variant X3         | mRNA |
| XM_011523616.2 | MYBBP1A | 0.0026633   | 10514 | MYB binding protein 1a, transcript variant X2                              | mRNA |
| NM_001100812.2 | CXCL16  | 3.40E-13    | 58191 | C-X-C motif chemokine ligand 16, transcript variant 2                      | mRNA |
| XM_005256      | KIF1C   | 9.29E-06    | 10749 | kinesin family member 1C, transcript variant X1                            | mRNA |

|                    |          |                 |       |                                                                        |              |
|--------------------|----------|-----------------|-------|------------------------------------------------------------------------|--------------|
| 424.2              |          |                 |       |                                                                        |              |
| XR_0017525<br>70.2 | DHX33    | 0.000141<br>056 | 56919 | DEAH-box helicase 33, transcript variant X2                            | misc_R<br>NA |
| XR_934069.<br>2    | DHX33    | 0.006445<br>37  | 56919 | DEAH-box helicase 33, transcript variant X1                            | misc_R<br>NA |
| XM_017025<br>404.2 | NCOR1    | 0.008158<br>3   | 9611  | nuclear receptor corepressor 1, transcript variant X17                 | mRNA         |
| XM_017025<br>411.2 | NCOR1    | 1.21E-06        | 9611  | nuclear receptor corepressor 1, transcript variant X27                 | mRNA         |
| XM_005256<br>563.4 | MPRIP    | 3.40E-13        | 23164 | myosin phosphatase Rho interacting protein, transcript variant X6      | mRNA         |
| XM_005256<br>556.4 | FLII     | 0.038533<br>3   | 2314  | FLII actin remodeling protein, transcript variant X2                   | mRNA         |
| NM_001316<br>919.1 | TVP23B   | 0.040914        | 51030 | trans-golgi network vesicle protein 23 homolog B, transcript variant 2 | mRNA         |
| NM_015276.<br>2    | USP22    | 3.37E-07        | 23326 | ubiquitin specific peptidase 22                                        | mRNA         |
| NM_001363          | KIAA0100 | 0.021103        | 9703  | KIAA0100, transcript variant 5                                         | mRNA         |

|                    |           |                 |       |                                                                                            |              |
|--------------------|-----------|-----------------|-------|--------------------------------------------------------------------------------------------|--------------|
| 827.1              |           | 3               |       |                                                                                            |              |
| NM_001363<br>829.1 | KIAA0100  | 9.92E-06        | 9703  | KIAA0100, transcript variant 7                                                             | mRNA         |
| XR_0017525<br>95.1 | SUPT6H    | 0.000169<br>724 | 6830  | SPT6 homolog, histone chaperone and transcription elongation factor, transcript variant X4 | misc_R<br>NA |
| XR_0017525<br>95.1 | SUPT6H    | 0.000657<br>308 | 6830  | SPT6 homolog, histone chaperone and transcription elongation factor, transcript variant X4 | misc_R<br>NA |
| NM_001303<br>542.3 | RAB11FIP4 | 0.018591<br>3   | 84440 | RAB11 family interacting protein 4, transcript variant 2                                   | mRNA         |
| NM_015355.<br>4    | SUZ12     | 1.35E-05        | 23512 | SUZ12 polycomb repressive complex 2 subunit, transcript variant 1                          | mRNA         |
| XM_024450<br>957.1 | MYO19     | 0.022186<br>4   | 80179 | myosin XIX, transcript variant X12                                                         | mRNA         |
| XM_024450<br>957.1 | MYO19     | 1.64E-06        | 80179 | myosin XIX, transcript variant X12                                                         | mRNA         |
| NM_198839.<br>3    | ACACA     | 3.57E-05        | 31    | acetyl-CoA carboxylase alpha, transcript variant 2                                         | mRNA         |
| NM_198839.         | ACACA     | 0.022186        | 31    | acetyl-CoA carboxylase alpha, transcript variant 2                                         | mRNA         |

|                    |          |                 |       |                                                         |              |
|--------------------|----------|-----------------|-------|---------------------------------------------------------|--------------|
| 3                  |          | 4               |       |                                                         |              |
| NM_198839.<br>3    | ACACA    | 1.69E-05        | 31    | acetyl-CoA carboxylase alpha, transcript variant 2      | mRNA         |
| NM_198839.<br>3    | ACACA    | 0.040914        | 31    | acetyl-CoA carboxylase alpha, transcript variant 2      | mRNA         |
| XR_0017525<br>04.1 | ACACA    | 0.017620<br>9   | 31    | acetyl-CoA carboxylase alpha, transcript variant X9     | misc_R<br>NA |
| XM_017024<br>078.1 | SYNRG    | 0.048575        | 11276 | synergin gamma, transcript variant X3                   | mRNA         |
| NM_014598.<br>4    | SOCS7    | 0.022186<br>4   | 30837 | suppressor of cytokine signaling 7                      | mRNA         |
| XM_011525<br>076.2 | ARHGAP23 | 0.012354        | 57636 | Rho GTPase activating protein 23, transcript variant X7 | mRNA         |
| NM_001005<br>862.3 | ERBB2    | 3.40E-13        | 2064  | erb-b2 receptor tyrosine kinase 2, transcript variant 2 | mRNA         |
| NM_001005<br>862.3 | ERBB2    | 0.000593<br>431 | 2064  | erb-b2 receptor tyrosine kinase 2, transcript variant 2 | mRNA         |
| NM_001145          | RARA     | 0.002401        | 5914  | retinoic acid receptor alpha, transcript variant 3      | mRNA         |

|                    |         |                 |        |                                                                            |      |
|--------------------|---------|-----------------|--------|----------------------------------------------------------------------------|------|
| 301.3              |         | 92              |        |                                                                            |      |
| XM_011525<br>165.2 | TOP2A   | 5.37E-05        | 7153   | DNA topoisomerase II alpha, transcript variant X2                          | mRNA |
| NM_198830.<br>2    | ACLY    | 0.006074<br>62  | 47     | ATP citrate lyase, transcript variant 2                                    | mRNA |
| NM_198830.<br>2    | ACLY    | 5.67E-06        | 47     | ATP citrate lyase, transcript variant 2                                    | mRNA |
| NM_198830.<br>2    | ACLY    | 0.000187<br>923 | 47     | ATP citrate lyase, transcript variant 2                                    | mRNA |
| XM_024450<br>898.1 | STAT5B  | 0.030044<br>3   | 6777   | signal transducer and activator of transcription 5B, transcript variant X2 | mRNA |
| XM_017024<br>977.1 | STAT5B  | 0.002663<br>3   | 6777   | signal transducer and activator of transcription 5B, transcript variant X3 | mRNA |
| NM_001384<br>988.1 | STAT3   | 0.009859<br>34  | 6774   | signal transducer and activator of transcription 3, transcript variant 16  | mRNA |
| XM_011524<br>440.2 | RETREG3 | 0.038533<br>3   | 162427 | reticulophagy regulator family member 3, transcript variant X1             | mRNA |
| NM_002087.         | GRN     | 0.002538        | 2896   | granulin precursor                                                         | mRNA |

|            |        |          |       |                                                                            |      |
|------------|--------|----------|-------|----------------------------------------------------------------------------|------|
| 4          |        | 27       |       |                                                                            |      |
| NM_004247. | EFTUD2 | 0.000822 | 9343  | elongation factor Tu GTP binding domain containing 2, transcript variant 1 | mRNA |
| 4          |        | 568      |       |                                                                            |      |
| XM_017025  | NPEPPS | 3.40E-13 | 9520  | aminopeptidase puromycin sensitive, transcript variant X1                  | mRNA |
| 372.2      |        |          |       |                                                                            |      |
| XM_005257  | ITGA3  | 3.40E-13 | 3675  | integrin subunit alpha 3, transcript variant X1                            | mRNA |
| 308.2      |        |          |       |                                                                            |      |
| XM_005257  | XYLT2  | 0.017620 | 64132 | xylosyltransferase 2, transcript variant X1                                | mRNA |
| 572.4      |        | 9        |       |                                                                            |      |
| XM_017025  | SPAG9  | 0.001484 | 9043  | sperm associated antigen 9, transcript variant X3                          | mRNA |
| 283.2      |        | 02       |       |                                                                            |      |
| NM_021626. | SCPEP1 | 0.003393 | 59342 | serine carboxypeptidase 1                                                  | mRNA |
| 3          |        | 83       |       |                                                                            |      |
| NM_004859. | CLTC   | 0.010431 | 1213  | clathrin heavy chain, transcript variant 1                                 | mRNA |
| 4          |        | 9        |       |                                                                            |      |
| NM_001288  | CLTC   | 3.40E-13 | 1213  | clathrin heavy chain, transcript variant 2                                 | mRNA |
| 653.2      |        |          |       |                                                                            |      |
| XM_011525  | USP32  | 4.60E-10 | 84669 | ubiquitin specific peptidase 32, transcript variant X7                     | mRNA |

|                    |         |                 |       |                                                                                                                         |              |
|--------------------|---------|-----------------|-------|-------------------------------------------------------------------------------------------------------------------------|--------------|
| 378.1              |         |                 |       |                                                                                                                         |              |
| XM_011525<br>374.1 | USP32   | 0.017620<br>9   | 84669 | ubiquitin specific peptidase 32, transcript variant X4                                                                  | mRNA         |
| XM_011525<br>378.1 | USP32   | 0.000323<br>968 | 84669 | ubiquitin specific peptidase 32, transcript variant X7                                                                  | mRNA         |
| NM_025185.<br>4    | TANC2   | 0.025326<br>2   | 26115 | tetratricopeptide repeat, ankyrin repeat and coiled-coil containing 2                                                   | mRNA         |
| NM_005828.<br>5    | DCAF7   | 0.017620<br>9   | 10238 | DDB1 and CUL4 associated factor 7, transcript variant 1                                                                 | mRNA         |
| NR_073585.<br>2    | DCAF7   | 2.01E-07        | 10238 | DDB1 and CUL4 associated factor 7, transcript variant 2                                                                 | misc_R<br>NA |
| NR_073585.<br>2    | DCAF7   | 6.09E-08        | 10238 | DDB1 and CUL4 associated factor 7, transcript variant 2                                                                 | misc_R<br>NA |
| XM_006721<br>657.1 | DDX42   | 0.002135<br>81  | 11325 | DEAD-box helicase 42, transcript variant X1                                                                             | mRNA         |
| NM_001330<br>439.1 | SMARCD2 | 0.030044<br>3   | 6603  | SWI/SNF related, matrix associated, actin dependent regulator of chromatin, subfamily d, member 2, transcript variant 2 | mRNA         |
| XM_005257          | SMURF2  | 0.001484        | 64750 | SMAD specific E3 ubiquitin protein ligase 2, transcript variant X1                                                      | mRNA         |

|                    |         |                |        |                                                                                              |      |
|--------------------|---------|----------------|--------|----------------------------------------------------------------------------------------------|------|
| 585.3              |         | 02             |        |                                                                                              |      |
| NM_002266.<br>4    | KPNA2   | 2.30E-05       | 3838   | karyopherin subunit alpha 2, transcript variant 2                                            | mRNA |
| XM_017024<br>389.1 | GGA3    | 0.040914       | 23163  | golgi associated, gamma adaptin ear containing, ARF binding protein 3, transcript variant X6 | mRNA |
| XM_017024<br>628.1 | LLGL2   | 0.003582<br>26 | 3993   | LLGL scribble cell polarity complex component 2, transcript variant X10                      | mRNA |
| NM_001320<br>747.2 | EVPL    | 0.017620<br>9  | 2125   | envoplakin, transcript variant 1                                                             | mRNA |
| NM_001260<br>503.2 | SRP68   | 1.07E-06       | 6730   | signal recognition particle 68, transcript variant 3                                         | mRNA |
| XM_011525<br>065.2 | USP36   | 0.045986       | 57602  | ubiquitin specific peptidase 36, transcript variant X5                                       | mRNA |
| XM_024450<br>582.1 | TBC1D16 | 0.002016<br>29 | 125058 | TBC1 domain family member 16, transcript variant X13                                         | mRNA |
| NM_014740.<br>4    | EIF4A3  | 0.002273<br>62 | 9775   | eukaryotic translation initiation factor 4A3                                                 | mRNA |
| NM_014740.         | EIF4A3  | 2.77E-05       | 9775   | eukaryotic translation initiation factor 4A3                                                 | mRNA |

|                    |           |                |        |                                                                                                 |          |
|--------------------|-----------|----------------|--------|-------------------------------------------------------------------------------------------------|----------|
| 4                  |           |                |        |                                                                                                 |          |
| NM_001256<br>071.3 | RNF213    | 0.007286<br>68 | 57674  | ring finger protein 213, transcript variant 3                                                   | mRNA     |
| XM_006721<br>995.3 | RNF213    | 0.043385<br>8  | 57674  | ring finger protein 213, transcript variant X2                                                  | mRNA     |
| NR_026857.<br>1    | BAIAP2-DT | 0.001039<br>18 | 440465 | BAIAP2 divergent transcript                                                                     | lnc_RNA  |
| XR_934502.<br>1    | NPLOC4    | 1.94E-06       | 55666  | NPL4 homolog, ubiquitin recognition factor, transcript variant X7                               | misc_RNA |
| XR_0017531<br>73.1 | SMCHD1    | 0.002663<br>3  | 23347  | structural maintenance of chromosomes flexible hinge domain containing 1, transcript variant X3 | misc_RNA |
| NM_001375<br>809.1 | LPIN2     | 0.009859<br>34 | 9663   | lipin 2, transcript variant 3                                                                   | mRNA     |
| NM_005406.<br>3    | ROCK1     | 0.011017<br>4  | 6093   | Rho associated coiled-coil containing protein kinase 1                                          | mRNA     |
| NM_020774.<br>4    | MIB1      | 0.007286<br>68 | 57534  | MIB E3 ubiquitin protein ligase 1                                                               | mRNA     |
| XM_017025          | MIB1      | 0.000987       | 57534  | MIB E3 ubiquitin protein ligase 1, transcript variant X1                                        | mRNA     |

|                    |       |                 |      |                                                                         |      |
|--------------------|-------|-----------------|------|-------------------------------------------------------------------------|------|
| 873.1              |       | 21              |      |                                                                         |      |
| XM_011525<br>980.2 | LAMA3 | 0.026886<br>6   | 3909 | laminin subunit alpha 3, transcript variant X3                          | mRNA |
| XM_011525<br>980.2 | LAMA3 | 0.005079<br>4   | 3909 | laminin subunit alpha 3, transcript variant X3                          | mRNA |
| XM_011525<br>980.2 | LAMA3 | 0.038533<br>3   | 3909 | laminin subunit alpha 3, transcript variant X3                          | mRNA |
| XM_011525<br>982.2 | LAMA3 | 1.35E-06        | 3909 | laminin subunit alpha 3, transcript variant X6                          | mRNA |
| XM_011525<br>980.2 | LAMA3 | 3.56E-06        | 3909 | laminin subunit alpha 3, transcript variant X3                          | mRNA |
| XM_011526<br>145.1 | SS18  | 0.001316<br>87  | 6760 | SS18 subunit of BAF chromatin remodeling complex, transcript variant X1 | mRNA |
| NM_004949.<br>5    | DSC2  | 1.59E-06        | 1824 | desmocollin 2, transcript variant Dsc2b                                 | mRNA |
| NM_024422.<br>6    | DSC2  | 0.000740<br>067 | 1824 | desmocollin 2, transcript variant Dsc2a                                 | mRNA |
| NM_004949.         | DSC2  | 0.000400        | 1824 | desmocollin 2, transcript variant Dsc2b                                 | mRNA |

|                    |         |                |       |                                                                       |      |
|--------------------|---------|----------------|-------|-----------------------------------------------------------------------|------|
| 5                  |         | 24             |       |                                                                       |      |
| XM_024451<br>095.1 | DSG2    | 3.40E-13       | 1829  | desmoglein 2, transcript variant X1                                   | mRNA |
| NM_001384<br>443.1 | GALNT1  | 0.030044<br>3  | 2589  | polypeptide N-acetylgalactosaminyltransferase 1, transcript variant 7 | mRNA |
| XM_017025<br>789.1 | ATP5F1A | 0.008685<br>41 | 498   | ATP synthase F1 subunit alpha, transcript variant X1                  | mRNA |
| XM_024451<br>137.1 | NEDD4L  | 2.96E-05       | 23327 | NEDD4 like E3 ubiquitin protein ligase, transcript variant X23        | mRNA |
| XM_005266<br>663.4 | NEDD4L  | 0.004022<br>4  | 23327 | NEDD4 like E3 ubiquitin protein ligase, transcript variant X4         | mRNA |
| NM_001375<br>912.1 | ZNF532  | 0.031976<br>3  | 55205 | zinc finger protein 532, transcript variant 19                        | mRNA |
| NM_005570.<br>4    | LMAN1   | 0.002538<br>27 | 3998  | lectin, mannose binding 1                                             | mRNA |
| NM_194449.<br>4    | PHLPP1  | 0.007700<br>01 | 23239 | PH domain and leucine rich repeat protein phosphatase 1               | mRNA |
| NM_001370          | CNDP2   | 0.038533       | 55748 | carnosine dipeptidase 2, transcript variant 6                         | mRNA |

|            |        |          |       |                                                                        |          |
|------------|--------|----------|-------|------------------------------------------------------------------------|----------|
| 254.1      |        | 3        |       |                                                                        |          |
| XR_0017537 | POLRMT | 0.018591 | 5442  | RNA polymerase mitochondrial, transcript variant X1                    | misc_RNA |
| 06.2       |        | 3        |       |                                                                        |          |
| XR_0029583 | REXO1  | 0.003798 | 57455 | RNA exonuclease 1 homolog, transcript variant X9                       | misc_RNA |
| 39.1       |        | 1        |       |                                                                        |          |
| XM_011528  | DOT1L  | 9.05E-05 | 84444 | DOT1 like histone lysine methyltransferase, transcript variant X4      | mRNA     |
| 360.1      |        |          |       |                                                                        |          |
| NM_001300  | TLE2   | 0.000400 | 7089  | TLE family member 2, transcriptional corepressor, transcript variant 4 | mRNA     |
| 846.2      |        | 24       |       |                                                                        |          |
| NM_001300  | TLE2   | 0.005079 | 7089  | TLE family member 2, transcriptional corepressor, transcript variant 4 | mRNA     |
| 846.2      |        | 4        |       |                                                                        |          |
| NM_002067. | GNA11  | 0.000323 | 2767  | G protein subunit alpha 11                                             | mRNA     |
| 5          |        | 968      |       |                                                                        |          |
| XM_017026  | NFIC   | 0.000105 | 4782  | nuclear factor I C, transcript variant X1                              | mRNA     |
| 834.2      |        | 814      |       |                                                                        |          |
| XM_005259  | FZR1   | 3.56E-06 | 51343 | fizzy and cell division cycle 20 related 1, transcript variant X3      | mRNA     |
| 573.5      |        |          |       |                                                                        |          |
| NM_006339. | HMG20B | 0.010431 | 10362 | high mobility group 20B                                                | mRNA     |

|                    |         |                 |       |                                                                               |      |
|--------------------|---------|-----------------|-------|-------------------------------------------------------------------------------|------|
| 3                  |         | 9               |       |                                                                               |      |
| XM_011527<br>846.1 | PIP5K1C | 2.03E-06        | 23396 | phosphatidylinositol-4-phosphate 5-kinase type 1 gamma, transcript variant X2 | mRNA |
| NM_001267<br>560.2 | TJP3    | 0.001578<br>44  | 27134 | tight junction protein 3, transcript variant 1                                | mRNA |
| NM_001271<br>996.2 | CREB3L3 | 0.000338<br>213 | 84699 | cAMP responsive element binding protein 3 like 3, transcript variant 3        | mRNA |
| NM_001271<br>996.2 | CREB3L3 | 0.030044<br>3   | 84699 | cAMP responsive element binding protein 3 like 3, transcript variant 3        | mRNA |
| NM_001384<br>611.1 | DPP9    | 0.001676<br>3   | 91039 | dipeptidyl peptidase 9, transcript variant 4                                  | mRNA |
| XM_011528<br>394.1 | RANBP3  | 0.043385<br>8   | 8498  | RAN binding protein 3, transcript variant X6                                  | mRNA |
| XM_011528<br>394.1 | RANBP3  | 1.01E-08        | 8498  | RAN binding protein 3, transcript variant X6                                  | mRNA |
| NM_000208.<br>4    | INSR    | 0.000380<br>287 | 3643  | insulin receptor, transcript variant 1                                        | mRNA |
| NM_000208.         | INSR    | 0.008685        | 3643  | insulin receptor, transcript variant 1                                        | mRNA |

|                    |         |                 |        |                                                                                                                          |              |
|--------------------|---------|-----------------|--------|--------------------------------------------------------------------------------------------------------------------------|--------------|
| 4                  |         | 41              |        |                                                                                                                          |              |
| NM_000208.<br>4    | INSR    | 0.040914        | 3643   | insulin receptor, transcript variant 1                                                                                   | mRNA         |
| NM_001166<br>112.2 | PNPLA6  | 0.000290<br>692 | 10908  | patatin like phospholipase domain containing 6, transcript variant 4                                                     | mRNA         |
| XR_0017537<br>28.1 | CAMSAP3 | 0.030044<br>3   | 57662  | calmodulin regulated spectrin associated protein family member 3, transcript variant X4                                  | misc_R<br>NA |
| NM_001318<br>730.2 | DNMT1   | 7.04E-08        | 1786   | DNA methyltransferase 1, transcript variant 3                                                                            | mRNA         |
| NM_133452.<br>3    | RAVER1  | 0.000112<br>562 | 125950 | ribonucleoprotein, PTB binding 1, transcript variant 1                                                                   | mRNA         |
| XM_024451<br>661.1 | SMARCA4 | 8.56E-06        | 6597   | SWI/SNF related, matrix associated, actin dependent regulator of chromatin, subfamily a, member 4, transcript variant X7 | mRNA         |
| XM_011528<br>151.1 | DOCK6   | 6.01E-05        | 57572  | dedicator of cytokinesis 6, transcript variant X2                                                                        | mRNA         |
| XM_011528<br>151.1 | DOCK6   | 3.36E-05        | 57572  | dedicator of cytokinesis 6, transcript variant X2                                                                        | mRNA         |
| XM_011528          | DOCK6   | 7.63E-09        | 57572  | dedicator of cytokinesis 6, transcript variant X2                                                                        | mRNA         |

|                    |          |                 |       |                                                                  |      |
|--------------------|----------|-----------------|-------|------------------------------------------------------------------|------|
| 151.1              |          |                 |       |                                                                  |      |
| XM_005260<br>000.2 | DOCK6    | 0.001254<br>07  | 57572 | dedicator of cytokinesis 6, transcript variant X6                | mRNA |
| NM_001379<br>609.1 | PRKCSH   | 3.40E-13        | 5589  | protein kinase C substrate 80K-H, transcript variant 7           | mRNA |
| NM_001173<br>498.2 | MAN2B1   | 9.94E-09        | 4125  | mannosidase alpha class 2B member 1, transcript variant 2        | mRNA |
| XM_024451<br>562.1 | CC2D1A   | 0.000307<br>575 | 54862 | coiled-coil and C2 domain containing 1A, transcript variant X1   | mRNA |
| NM_002741.<br>5    | PKN1     | 0.022186<br>4   | 5585  | protein kinase N1, transcript variant 2                          | mRNA |
| NM_014299.<br>3    | BRD4     | 0.023692<br>5   | 23476 | bromodomain containing 4, transcript variant short               | mRNA |
| NM_001130<br>065.2 | MYO9B    | 6.38E-05        | 4650  | myosin IXB, transcript variant 2                                 | mRNA |
| NM_004145.<br>4    | MYO9B    | 0.000112<br>562 | 4650  | myosin IXB, transcript variant 1                                 | mRNA |
| XM_011528          | COLGALT1 | 2.58E-08        | 79709 | collagen beta(1-O)galactosyltransferase 1, transcript variant X4 | mRNA |

|                    |         |                 |        |                                                                          |              |
|--------------------|---------|-----------------|--------|--------------------------------------------------------------------------|--------------|
| 299.3              |         |                 |        |                                                                          |              |
| XM_017026<br>516.1 | MAST3   | 0.016627<br>6   | 23031  | microtubule associated serine/threonine kinase 3, transcript variant X20 | mRNA         |
| NR_162071.<br>1    | PIK3R2  | 0.000290<br>692 | 5296   | phosphoinositide-3-kinase regulatory subunit 2, transcript variant 3     | misc_R<br>NA |
| XM_006722<br>666.2 | SSBP4   | 8.48E-05        | 170463 | single stranded DNA binding protein 4, transcript variant X8             | mRNA         |
| XM_017027<br>106.2 | UPF1    | 0.038533<br>3   | 5976   | UPF1 RNA helicase and ATPase, transcript variant X2                      | mRNA         |
| XR_935753.<br>2    | DPY19L3 | 0.048575        | 147991 | dpy-19 like C-mannosyltransferase 3, transcript variant X6               | misc_R<br>NA |
| XM_017027<br>349.1 | ANKRD27 | 0.038533<br>3   | 84079  | ankyrin repeat domain 27, transcript variant X2                          | mRNA         |
| NM_014686.<br>5    | GARRE1  | 8.76E-08        | 9710   | granule associated Rac and RHOG effector 1                               | mRNA         |
| XR_0017536<br>41.1 | HAUS5   | 0.005747<br>95  | 23354  | HAUS augmin like complex subunit 5, transcript variant X1                | misc_R<br>NA |
| NM_001319          | RBM42   | 0.000160        | 79171  | RNA binding motif protein 42, transcript variant 2                       | mRNA         |

|                    |         |                 |        |                                                                           |              |
|--------------------|---------|-----------------|--------|---------------------------------------------------------------------------|--------------|
| 113.2              |         | 289             |        |                                                                           |              |
| NM_024321.<br>5    | RBM42   | 0.002016<br>29  | 79171  | RNA binding motif protein 42, transcript variant 1                        | mRNA         |
| XM_011526<br>838.1 | WDR62   | 0.025326<br>2   | 284403 | WD repeat domain 62, transcript variant X4                                | mRNA         |
| NR_169274.<br>1    | SAMD4B  | 2.13E-06        | 55095  | sterile alpha motif domain containing 4B, transcript variant 34           | misc_R<br>NA |
| NM_001384<br>571.1 | SAMD4B  | 0.012354        | 55095  | sterile alpha motif domain containing 4B, transcript variant 8            | mRNA         |
| NM_022835.<br>3    | PLEKHG2 | 2.78E-09        | 64857  | pleckstrin homology and RhoGEF domain containing G2, transcript variant 1 | mRNA         |
| NM_001130<br>825.2 | SUPT5H  | 0.000338<br>213 | 6829   | SPT5 homolog, DSIF elongation factor subunit, transcript variant 4        | mRNA         |
| NM_001130<br>825.2 | SUPT5H  | 0.004022<br>4   | 6829   | SPT5 homolog, DSIF elongation factor subunit, transcript variant 4        | mRNA         |
| NM_001130<br>825.2 | SUPT5H  | 5.68E-05        | 6829   | SPT5 homolog, DSIF elongation factor subunit, transcript variant 4        | mRNA         |
| NM_001130          | SUPT5H  | 0.002016        | 6829   | SPT5 homolog, DSIF elongation factor subunit, transcript variant 4        | mRNA         |

|                    |         |                 |       |                                                                                         |      |
|--------------------|---------|-----------------|-------|-----------------------------------------------------------------------------------------|------|
| 825.2              |         | 29              |       |                                                                                         |      |
| NM_004706.<br>4    | ARHGEF1 | 0.003393<br>83  | 9138  | Rho guanine nucleotide exchange factor 1, transcript variant 2                          | mRNA |
| NM_001329<br>922.1 | CALM3   | 0.003216<br>51  | 808   | calmodulin 3, transcript variant 3                                                      | mRNA |
| XM_011526<br>878.1 | STRN4   | 3.56E-08        | 29888 | striatin 4, transcript variant X8                                                       | mRNA |
| XM_005258<br>677.4 | ZC3H4   | 0.008158<br>3   | 23211 | zinc finger CCCH-type containing 4, transcript variant X4                               | mRNA |
| XM_005258<br>677.4 | ZC3H4   | 0.000695<br>991 | 23211 | zinc finger CCCH-type containing 4, transcript variant X4                               | mRNA |
| XM_005258<br>677.4 | ZC3H4   | 5.80E-10        | 23211 | zinc finger CCCH-type containing 4, transcript variant X4                               | mRNA |
| NM_001161<br>354.2 | PLEKHA4 | 0.022186<br>4   | 57664 | pleckstrin homology domain containing A4, transcript variant 2                          | mRNA |
| NM_006184.<br>6    | NUCB1   | 0.000199<br>653 | 4924  | nucleobindin 1                                                                          | mRNA |
| XM_024451          | TRPM4   | 0.004022        | 54795 | transient receptor potential cation channel subfamily M member 4, transcript variant X2 | mRNA |

|                    |          |                 |       |                                                                                        |      |
|--------------------|----------|-----------------|-------|----------------------------------------------------------------------------------------|------|
| 557.1              |          | 4               |       |                                                                                        |      |
| NM_001195<br>227.2 | TRPM4    | 0.000777<br>792 | 54795 | transient receptor potential cation channel subfamily M member 4, transcript variant 2 | mRNA |
| XM_024451<br>721.1 | MYH14    | 3.98E-05        | 79784 | myosin heavy chain 14, transcript variant X5                                           | mRNA |
| XM_011526<br>993.3 | CNOT3    | 0.043385<br>8   | 4849  | CCR4-NOT transcription complex subunit 3, transcript variant X9                        | mRNA |
| XM_005259<br>013.4 | PPP1R12C | 0.015633<br>2   | 54776 | protein phosphatase 1 regulatory subunit 12C, transcript variant X1                    | mRNA |
| NM_001321<br>263.2 | EPN1     | 0.001786<br>4   | 29924 | epsin 1, transcript variant 4                                                          | mRNA |
| NM_015677.<br>4    | SH3YL1   | 0.002401<br>92  | 26751 | SH3 and SYLF domain containing 1, transcript variant 1                                 | mRNA |
| XM_017003<br>900.1 | GRHL1    | 0.022186<br>4   | 29841 | grainyhead like transcription factor 1, transcript variant X5                          | mRNA |
| XM_017005<br>378.2 | ROCK2    | 1.28E-05        | 9475  | Rho associated coiled-coil containing protein kinase 2, transcript variant X2          | mRNA |
| XM_017005          | ROCK2    | 0.038533        | 9475  | Rho associated coiled-coil containing protein kinase 2, transcript variant X2          | mRNA |

|                    |         |                 |       |                                                                               |              |
|--------------------|---------|-----------------|-------|-------------------------------------------------------------------------------|--------------|
| 378.2              |         | 3               |       |                                                                               |              |
| XM_005246<br>190.3 | ROCK2   | 3.05E-06        | 9475  | Rho associated coiled-coil containing protein kinase 2, transcript variant X1 | mRNA         |
| NM_004939.<br>3    | DDX1    | 0.011017<br>4   | 1653  | DEAD-box helicase 1                                                           | mRNA         |
| NM_002997.<br>5    | SDC1    | 0.016627<br>6   | 6382  | syndecan 1, transcript variant 2                                              | mRNA         |
| NM_016131.<br>5    | RAB10   | 0.000150<br>569 | 10890 | RAB10, member RAS oncogene family                                             | mRNA         |
| NM_000182.<br>5    | HADHA   | 8.48E-05        | 3030  | hydroxyacyl-CoA dehydrogenase trifunctional multienzyme complex subunit alpha | mRNA         |
| NR_137633.<br>2    | SELENOI | 0.000400<br>24  | 85465 | selenoprotein I, transcript variant 2                                         | misc_R<br>NA |
| NM_017877.<br>4    | SLC35F6 | 0.004255<br>39  | 54978 | solute carrier family 35 member F6                                            | mRNA         |
| XR_0017387<br>91.2 | TMEM214 | 0.008158<br>3   | 54867 | transmembrane protein 214, transcript variant X4                              | misc_R<br>NA |
| XM_017004          | BIRC6   | 0.011017        | 57448 | baculoviral IAP repeat containing 6, transcript variant X19                   | mRNA         |

|                    |        |                 |       |                                                                         |              |
|--------------------|--------|-----------------|-------|-------------------------------------------------------------------------|--------------|
| 560.1              |        | 4               |       |                                                                         |              |
| XM_005264<br>454.5 | BIRC6  | 0.003798<br>1   | 57448 | baculoviral IAP repeat containing 6, transcript variant X11             | mRNA         |
| XM_005264<br>357.5 | CRIM1  | 2.27E-06        | 51232 | cysteine rich transmembrane BMP regulator 1, transcript variant X4      | mRNA         |
| XM_005264<br>357.5 | CRIM1  | 3.54E-07        | 51232 | cysteine rich transmembrane BMP regulator 1, transcript variant X4      | mRNA         |
| NM_001382<br>394.1 | SOS1   | 0.045986        | 6654  | SOS Ras/Rac guanine nucleotide exchange factor 1, transcript variant 2  | mRNA         |
| XM_006711<br>991.1 | EML4   | 0.000358<br>192 | 27436 | EMAP like 4, transcript variant X2                                      | mRNA         |
| XR_0029588<br>96.1 | LRPPRC | 0.036449<br>2   | 10128 | leucine rich pentatricopeptide repeat containing, transcript variant X4 | misc_R<br>NA |
| NM_001374<br>325.1 | FBXO11 | 0.048575        | 80204 | F-box protein 11, transcript variant 5                                  | mRNA         |
| NM_014614.<br>3    | PSME4  | 4.47E-05        | 23198 | proteasome activator subunit 4                                          | mRNA         |
| NM_014614.         | PSME4  | 0.023692        | 23198 | proteasome activator subunit 4                                          | mRNA         |

|                    |        |                |       |                                                                    |      |
|--------------------|--------|----------------|-------|--------------------------------------------------------------------|------|
| 3                  |        | 5              |       |                                                                    |      |
| XM_017004<br>779.1 | SPTBN1 | 2.03E-06       | 6711  | spectrin beta, non-erythrocytic 1, transcript variant X3           | mRNA |
| XM_017004<br>779.1 | SPTBN1 | 1.28E-05       | 6711  | spectrin beta, non-erythrocytic 1, transcript variant X3           | mRNA |
| XM_017005<br>172.1 | PNPT1  | 0.034207<br>6  | 87178 | polyribonucleotide nucleotidyltransferase 1, transcript variant X2 | mRNA |
| NM_014709.<br>4    | USP34  | 0.048575       | 9736  | ubiquitin specific peptidase 34                                    | mRNA |
| NM_014709.<br>4    | USP34  | 0.011664<br>8  | 9736  | ubiquitin specific peptidase 34                                    | mRNA |
| NM_014709.<br>4    | USP34  | 0.005433<br>82 | 9736  | ubiquitin specific peptidase 34                                    | mRNA |
| NM_001256<br>721.1 | CCT4   | 9.29E-06       | 10575 | chaperonin containing TCP1 subunit 4, transcript variant 2         | mRNA |
| NM_001199<br>111.2 | MDH1   | 6.01E-05       | 4190  | malate dehydrogenase 1, transcript variant 2                       | mRNA |
| XM_017004          | PELI1  | 0.006074       | 57162 | pellino E3 ubiquitin protein ligase 1, transcript variant X1       | mRNA |

|                    |        |                |       |                                                                          |              |
|--------------------|--------|----------------|-------|--------------------------------------------------------------------------|--------------|
| 520.1              |        | 62             |       |                                                                          |              |
| XM_017003<br>801.1 | GFPT1  | 0.004255<br>39 | 2673  | glutamine--fructose-6-phosphate transaminase 1, transcript variant X1    | mRNA         |
| XM_017003<br>801.1 | GFPT1  | 0.000400<br>24 | 2673  | glutamine--fructose-6-phosphate transaminase 1, transcript variant X1    | mRNA         |
| XM_017003<br>802.2 | GFPT1  | 0.001039<br>18 | 2673  | glutamine--fructose-6-phosphate transaminase 1, transcript variant X2    | mRNA         |
| XM_017003<br>802.2 | GFPT1  | 2.43E-05       | 2673  | glutamine--fructose-6-phosphate transaminase 1, transcript variant X2    | mRNA         |
| NM_015120.<br>4    | ALMS1  | 0.018591<br>3  | 7840  | ALMS1 centrosome and basal body associated protein, transcript variant 1 | mRNA         |
| NR_033935.<br>2    | DCTN1  | 1.49E-06       | 1639  | dynactin subunit 1, transcript variant 7                                 | misc_R<br>NA |
| NM_001371<br>525.1 | HK2    | 0.040914       | 3099  | hexokinase 2, transcript variant 2                                       | mRNA         |
| NM_001371<br>525.1 | HK2    | 1.59E-05       | 3099  | hexokinase 2, transcript variant 2                                       | mRNA         |
| NM_015425.         | POLR1A | 0.038533       | 25885 | RNA polymerase I subunit A                                               | mRNA         |

|                    |          |                 |       |                                                              |      |
|--------------------|----------|-----------------|-------|--------------------------------------------------------------|------|
| 6                  |          | 3               |       |                                                              |      |
| NM_014014.<br>5    | SNRNP200 | 4.60E-10        | 23020 | small nuclear ribonucleoprotein U5 subunit 200               | mRNA |
| NM_014014.<br>5    | SNRNP200 | 8.96E-06        | 23020 | small nuclear ribonucleoprotein U5 subunit 200               | mRNA |
| NM_014014.<br>5    | SNRNP200 | 0.015633<br>2   | 23020 | small nuclear ribonucleoprotein U5 subunit 200               | mRNA |
| NM_014014.<br>5    | SNRNP200 | 7.63E-09        | 23020 | small nuclear ribonucleoprotein U5 subunit 200               | mRNA |
| NM_014014.<br>5    | SNRNP200 | 0.001316<br>87  | 23020 | small nuclear ribonucleoprotein U5 subunit 200               | mRNA |
| NM_001349<br>256.2 | KANSL3   | 0.048575        | 55683 | KAT8 regulatory NSL complex subunit 3, transcript variant 8  | mRNA |
| NM_001349<br>262.2 | KANSL3   | 0.018591<br>3   | 55683 | KAT8 regulatory NSL complex subunit 3, transcript variant 14 | mRNA |
| NM_001349<br>262.2 | KANSL3   | 0.000101<br>311 | 55683 | KAT8 regulatory NSL complex subunit 3, transcript variant 14 | mRNA |
| NM_015348.         | TMEM131  | 0.004497        | 23505 | transmembrane protein 131                                    | mRNA |

|                    |        |                 |       |                                                                                 |              |
|--------------------|--------|-----------------|-------|---------------------------------------------------------------------------------|--------------|
| 2                  |        | 29              |       |                                                                                 |              |
| XM_005264<br>068.3 | MAP4K4 | 0.000307<br>575 | 9448  | mitogen-activated protein kinase kinase kinase kinase 4, transcript variant X33 | mRNA         |
| NM_001384<br>508.1 | MAP4K4 | 7.51E-05        | 9448  | mitogen-activated protein kinase kinase kinase kinase 4, transcript variant 29  | mRNA         |
| XM_005264<br>048.2 | MAP4K4 | 2.58E-08        | 9448  | mitogen-activated protein kinase kinase kinase kinase 4, transcript variant X1  | mRNA         |
| XR_0017390<br>79.1 | GCC2   | 0.017620<br>9   | 9648  | GRIP and coiled-coil domain containing 2, transcript variant X6                 | misc_R<br>NA |
| NM_001371<br>494.1 | LIMS1  | 3.40E-13        | 3987  | LIM zinc finger domain containing 1, transcript variant 7                       | mRNA         |
| XM_005264<br>003.3 | RANBP2 | 0.000400<br>24  | 5903  | RAN binding protein 2, transcript variant X3                                    | mRNA         |
| XM_011511<br>634.2 | ANAPC1 | 3.77E-05        | 64682 | anaphase promoting complex subunit 1, transcript variant X4                     | mRNA         |
| NM_001282<br>779.2 | POLR1B | 0.031976<br>3   | 84172 | RNA polymerase I subunit B, transcript variant 7                                | mRNA         |
| NM_001282          | POLR1B | 0.002273        | 84172 | RNA polymerase I subunit B, transcript variant 5                                | mRNA         |

|                |        |             |       |                                                                        |          |
|----------------|--------|-------------|-------|------------------------------------------------------------------------|----------|
| 776.2          |        | 62          |       |                                                                        |          |
| NR_102318.1    | ACTR3  | 1.42E-06    | 10096 | actin related protein 3, transcript variant 3                          | misc_RNA |
| NM_002830.4    | PTPN4  | 0.0026633   | 5775  | protein tyrosine phosphatase non-receptor type 4                       | mRNA     |
| XM_006712382.1 | CLASP1 | 0.000338213 | 23332 | cytoplasmic linker associated protein 1, transcript variant X24        | mRNA     |
| NM_004622.3    | TSN    | 0.0300443   | 7247  | translin, transcript variant 1                                         | mRNA     |
| NM_001320642.1 | BIN1   | 0.00148402  | 274   | bridging integrator 1, transcript variant 15                           | mRNA     |
| NM_006609.5    | MAP3K2 | 0.0342076   | 10746 | mitogen-activated protein kinase kinase kinase 2, transcript variant 1 | mRNA     |
| XM_017004508.1 | UGGT1  | 0.00607462  | 56886 | UDP-glucose glycoprotein glucosyltransferase 1, transcript variant X6  | mRNA     |
| XM_017004508.1 | UGGT1  | 0.000931169 | 56886 | UDP-glucose glycoprotein glucosyltransferase 1, transcript variant X6  | mRNA     |
| XM_017004      | UGGT1  | 0.030044    | 56886 | UDP-glucose glycoprotein glucosyltransferase 1, transcript variant X7  | mRNA     |

|                    |       |                 |        |                                                                                               |      |
|--------------------|-------|-----------------|--------|-----------------------------------------------------------------------------------------------|------|
| 509.1              |       | 3               |        |                                                                                               |      |
| NM_005915.<br>6    | MCM6  | 0.000307<br>575 | 4175   | minichromosome maintenance complex component 6                                                | mRNA |
| NM_005915.<br>6    | MCM6  | 0.012362<br>4   | 4175   | minichromosome maintenance complex component 6                                                | mRNA |
| XM_011511<br>395.3 | RIF1  | 0.038533<br>3   | 55183  | replication timing regulatory factor 1, transcript variant X14                                | mRNA |
| XM_011511<br>395.3 | RIF1  | 0.002833<br>12  | 55183  | replication timing regulatory factor 1, transcript variant X14                                | mRNA |
| XM_011510<br>530.1 | FMNL2 | 0.012354        | 114793 | formin like 2, transcript variant X1                                                          | mRNA |
| XM_011510<br>530.1 | FMNL2 | 0.026886<br>6   | 114793 | formin like 2, transcript variant X1                                                          | mRNA |
| XM_006712<br>814.3 | TANC1 | 9.05E-05        | 85461  | tetratricopeptide repeat, ankyrin repeat and coiled-coil containing 1, transcript variant X25 | mRNA |
| XM_017003<br>357.1 | UBR3  | 0.021103<br>3   | 130507 | ubiquitin protein ligase E3 component n-recognin 3, transcript variant X9                     | mRNA |
| XM_024453          | TLK1  | 0.008158        | 9874   | tousled like kinase 1, transcript variant X4                                                  | mRNA |

|                    |         |                 |       |                                                                           |              |
|--------------------|---------|-----------------|-------|---------------------------------------------------------------------------|--------------|
| 262.1              |         | 3               |       |                                                                           |              |
| NM_001271<br>789.2 | DYNC1I2 | 0.000242<br>029 | 1781  | dynein cytoplasmic 1 intermediate chain 2, transcript variant 6           | mRNA         |
| NR_073366.<br>2    | DNAJC10 | 0.000112<br>562 | 54431 | DnaJ heat shock protein family (Hsp40) member C10, transcript variant 4   | misc_R<br>NA |
| NM_002210.<br>5    | ITGAV   | 0.003216<br>51  | 3685  | integrin subunit alpha V, transcript variant 1                            | mRNA         |
| NM_014585.<br>6    | SLC40A1 | 0.022186<br>4   | 30061 | solute carrier family 40 member 1                                         | mRNA         |
| NM_001321<br>315.1 | NAB1    | 0.025326<br>2   | 4664  | NGFI-A binding protein 1, transcript variant 5                            | mRNA         |
| XR_0017389<br>15.2 | STAT1   | 0.045986        | 6772  | signal transducer and activator of transcription 1, transcript variant X4 | misc_R<br>NA |
| NM_001384<br>887.1 | STAT1   | 0.000169<br>724 | 6772  | signal transducer and activator of transcription 1, transcript variant 8  | mRNA         |
| NM_001384<br>887.1 | STAT1   | 3.40E-13        | 6772  | signal transducer and activator of transcription 1, transcript variant 8  | mRNA         |
| XM_024452          | MYO1B   | 0.013925        | 4430  | myosin IB, transcript variant X2                                          | mRNA         |

|            |         |          |        |                                                                                       |          |
|------------|---------|----------|--------|---------------------------------------------------------------------------------------|----------|
| 914.1      |         | 3        |        |                                                                                       |          |
| XM_024452  | MYO1B   | 0.001676 | 4430   | myosin IB, transcript variant X2                                                      | mRNA     |
| 914.1      |         | 3        |        |                                                                                       |          |
| XR_0017386 | SF3B1   | 4.23E-05 | 23451  | splicing factor 3b subunit 1, transcript variant X1                                   | misc_RNA |
| 80.2       |         |          |        |                                                                                       |          |
| NM_001321  | BZW1    | 0.018591 | 9689   | basic leucine zipper and W2 domains 1, transcript variant 6                           | mRNA     |
| 690.1      |         | 3        |        |                                                                                       |          |
| NM_001321  | BZW1    | 7.85E-08 | 9689   | basic leucine zipper and W2 domains 1, transcript variant 8                           | mRNA     |
| 693.2      |         |          |        |                                                                                       |          |
| NM_020919. | ALS2    | 0.023692 | 57679  | alsin Rho guanine nucleotide exchange factor ALS2, transcript variant 1               | mRNA     |
| 4          |         | 5        |        |                                                                                       |          |
| NM_001114  | NBEAL1  | 0.013925 | 65065  | neurobeachin like 1, transcript variant 1                                             | mRNA     |
| 132.2      |         | 3        |        |                                                                                       |          |
| NM_213589. | RAPH1   | 0.001405 | 65059  | Ras association (RalGDS/AF-6) and pleckstrin homology domains 1, transcript variant 1 | mRNA     |
| 3          |         | 07       |        |                                                                                       |          |
| XM_017003  | PIKFYVE | 0.045986 | 200576 | phosphoinositide kinase, FYVE-type zinc finger containing, transcript variant X5      | mRNA     |
| 568.1      |         |          |        |                                                                                       |          |
| XM_017003  | PIKFYVE | 0.013925 | 200576 | phosphoinositide kinase, FYVE-type zinc finger containing, transcript variant X20     | mRNA     |

|                    |         |                 |        |                                                                                  |              |
|--------------------|---------|-----------------|--------|----------------------------------------------------------------------------------|--------------|
| 574.1              |         | 3               |        |                                                                                  |              |
| XM_017003<br>568.1 | PIKFYVE | 0.000931<br>169 | 200576 | phosphoinositide kinase, FYVE-type zinc finger containing, transcript variant X5 | mRNA         |
| NM_021141.<br>4    | XRCC5   | 0.004497<br>29  | 7520   | X-ray repair cross complementing 5                                               | mRNA         |
| NM_021141.<br>4    | XRCC5   | 0.015633<br>2   | 7520   | X-ray repair cross complementing 5                                               | mRNA         |
| NM_007127.<br>3    | VIL1    | 0.045986        | 7429   | villin 1                                                                         | mRNA         |
| NM_007127.<br>3    | VIL1    | 2.33E-08        | 7429   | villin 1                                                                         | mRNA         |
| NM_007127.<br>3    | VIL1    | 0.036449<br>2   | 7429   | villin 1                                                                         | mRNA         |
| XM_011511<br>787.2 | ZNF142  | 0.045986        | 7701   | zinc finger protein 142, transcript variant X6                                   | mRNA         |
| NR_130154.<br>2    | FARSB   | 0.045986        | 10056  | phenylalanyl-tRNA synthetase subunit beta, transcript variant 2                  | misc_R<br>NA |
| NM_001354          | ACSL3   | 3.40E-13        | 2181   | acyl-CoA synthetase long chain family member 3, transcript variant 3             | mRNA         |

|            |          |          |       |                                                                      |      |
|------------|----------|----------|-------|----------------------------------------------------------------------|------|
| 158.2      |          |          |       |                                                                      |      |
| NM_001354  | ACSL3    | 0.018591 | 2181  | acyl-CoA synthetase long chain family member 3, transcript variant 3 | mRNA |
| 158.2      |          | 3        |       |                                                                      |      |
| NM_020830. | WDFY1    | 0.001405 | 57590 | WD repeat and FYVE domain containing 1                               | mRNA |
| 5          |          | 07       |       |                                                                      |      |
| NM_001135  | AGFG1    | 7.11E-05 | 3267  | ArfGAP with FG repeats 1, transcript variant 1                       | mRNA |
| 187.2      |          |          |       |                                                                      |      |
| NM_001130  | CAB39    | 3.40E-13 | 51719 | calcium binding protein 39, transcript variant 2                     | mRNA |
| 849.2      |          |          |       |                                                                      |      |
| NM_001191  | PSMD1    | 1.35E-05 | 5707  | proteasome 26S subunit, non-ATPase 1, transcript variant 2           | mRNA |
| 037.2      |          |          |       |                                                                      |      |
| XM_011512  | DGKD     | 3.40E-06 | 8527  | diacylglycerol kinase delta, transcript variant X12                  | mRNA |
| 035.1      |          |          |       |                                                                      |      |
| XM_017003  | TRAF3IP1 | 0.018591 | 26146 | TRAF3 interacting protein 1, transcript variant X2                   | mRNA |
| 789.1      |          | 3        |       |                                                                      |      |
| NM_023083. | CAPN10   | 0.002273 | 11132 | calpain 10, transcript variant 1                                     | mRNA |
| 4          |          | 62       |       |                                                                      |      |
| XM_011511  | HDLBP    | 7.63E-09 | 3069  | high density lipoprotein binding protein, transcript variant X4      | mRNA |

|                    |        |                 |       |                                                         |              |
|--------------------|--------|-----------------|-------|---------------------------------------------------------|--------------|
| 058.3              |        |                 |       |                                                         |              |
| NM_001282<br>308.2 | STK25  | 2.03E-06        | 10494 | serine/threonine kinase 25, transcript variant 7        | mRNA         |
| NM_016143.<br>5    | NSFL1C | 0.017620<br>9   | 55968 | NSFL1 cofactor, transcript variant 1                    | mRNA         |
| NM_001323<br>332.2 | ATRN   | 0.000510<br>829 | 8455  | attractin, transcript variant 5                         | mRNA         |
| NR_136336.<br>2    | CDC25B | 0.048575        | 994   | cell division cycle 25B, transcript variant 12          | misc_R<br>NA |
| XM_024452<br>016.1 | CDS2   | 0.001405<br>07  | 8760  | CDP-diacylglycerol synthase 2, transcript variant X3    | mRNA         |
| XM_024452<br>016.1 | CDS2   | 0.019824<br>4   | 8760  | CDP-diacylglycerol synthase 2, transcript variant X3    | mRNA         |
| NM_017671.<br>5    | FERMT1 | 9.53E-05        | 55612 | FERM domain containing kindlin 1                        | mRNA         |
| XM_024451<br>935.1 | FERMT1 | 0.004255<br>39  | 55612 | FERM domain containing kindlin 1, transcript variant X1 | mRNA         |
| NM_000214.         | JAG1   | 8.96E-06        | 182   | jagged canonical Notch ligand 1                         | mRNA         |

|            |         |          |       |                                                                     |      |
|------------|---------|----------|-------|---------------------------------------------------------------------|------|
| 3          |         |          |       |                                                                     |      |
| NM_000214. | JAG1    | 0.013925 | 182   | jagged canonical Notch ligand 1                                     | mRNA |
| 3          |         | 3        |       |                                                                     |      |
| NM_001365  | RRBP1   | 0.016627 | 6238  | ribosome binding protein 1, transcript variant 3                    | mRNA |
| 613.2      |         | 6        |       |                                                                     |      |
| NM_001172  | SEC23B  | 1.13E-05 | 10483 | SEC23 homolog B, COPII coat complex component, transcript variant 4 | mRNA |
| 745.3      |         |          |       |                                                                     |      |
| NM_001242  | RIN2    | 0.026886 | 54453 | Ras and Rab interactor 2, transcript variant 1                      | mRNA |
| 581.2      |         | 6        |       |                                                                     |      |
| NM_012255. | XRN2    | 0.026886 | 22803 | 5'-3' exoribonuclease 2, transcript variant 2                       | mRNA |
| 5          |         | 6        |       |                                                                     |      |
| XM_011528  | TPX2    | 7.04E-08 | 22974 | TPX2 microtubule nucleation factor, transcript variant X3           | mRNA |
| 700.3      |         |          |       |                                                                     |      |
| XM_006723  | CEP250  | 0.000323 | 11190 | centrosomal protein 250, transcript variant X3                      | mRNA |
| 691.1      |         | 968      |       |                                                                     |      |
| NM_012156. | EPB41L1 | 0.000482 | 2036  | erythrocyte membrane protein band 4.1 like 1, transcript variant 1  | mRNA |
| 2          |         | 835      |       |                                                                     |      |
| NM_001258  | EPB41L1 | 0.003393 | 2036  | erythrocyte membrane protein band 4.1 like 1, transcript variant 5  | mRNA |

|                    |         |                 |        |                                                                                     |      |
|--------------------|---------|-----------------|--------|-------------------------------------------------------------------------------------|------|
| 331.2              |         | 83              |        |                                                                                     |      |
| XM_017028<br>025.1 | SRC     | 4.76E-05        | 6714   | SRC proto-oncogene, non-receptor tyrosine kinase, transcript variant X2             | mRNA |
| XM_005260<br>465.3 | RALGAPB | 9.78E-08        | 57148  | Ral GTPase activating protein non-catalytic subunit beta, transcript variant X5     | mRNA |
| NM_182811.<br>2    | PLCG1   | 0.000105<br>814 | 5335   | phospholipase C gamma 1, transcript variant 2                                       | mRNA |
| NM_175914.<br>5    | HNF4A   | 0.000695<br>991 | 3172   | hepatocyte nuclear factor 4 alpha, transcript variant 5                             | mRNA |
| NM_052951.<br>3    | DNTTIP1 | 0.002401<br>92  | 116092 | deoxynucleotidyltransferase terminal interacting protein 1                          | mRNA |
| XM_005260<br>504.4 | ZNF335  | 0.045986        | 63925  | zinc finger protein 335, transcript variant X1                                      | mRNA |
| NM_006534.<br>4    | NCOA3   | 1.64E-06        | 8202   | nuclear receptor coactivator 3, transcript variant 2                                | mRNA |
| XM_005260<br>252.3 | ARFGEF2 | 0.000199<br>653 | 10564  | ADP ribosylation factor guanine nucleotide exchange factor 2, transcript variant X1 | mRNA |
| NM_006420.         | ARFGEF2 | 0.003393        | 10564  | ADP ribosylation factor guanine nucleotide exchange factor 2                        | mRNA |

|                    |         |                 |        |                                                                                     |              |
|--------------------|---------|-----------------|--------|-------------------------------------------------------------------------------------|--------------|
| 3                  |         | 83              |        |                                                                                     |              |
| XM_005260<br>252.3 | ARFGEF2 | 0.004766<br>76  | 10564  | ADP ribosylation factor guanine nucleotide exchange factor 2, transcript variant X1 | mRNA         |
| NM_001316.<br>4    | CSE1L   | 0.000227<br>166 | 1434   | chromosome segregation 1 like, transcript variant 1                                 | mRNA         |
| NM_018683.<br>4    | RNF114  | 0.003582<br>26  | 55905  | ring finger protein 114                                                             | mRNA         |
| NM_018683.<br>4    | RNF114  | 0.040914        | 55905  | ring finger protein 114                                                             | mRNA         |
| NM_001001<br>433.3 | STX16   | 0.028282<br>8   | 8675   | syntaxin 16, transcript variant 1                                                   | mRNA         |
| XM_024451<br>840.1 | LSM14B  | 0.040914        | 149986 | LSM family member 14B, transcript variant X13                                       | mRNA         |
| XR_936532.<br>2    | LAMA5   | 0.002663<br>3   | 3911   | laminin subunit alpha 5, transcript variant X4                                      | misc_R<br>NA |
| XR_936532.<br>2    | LAMA5   | 4.80E-10        | 3911   | laminin subunit alpha 5, transcript variant X4                                      | misc_R<br>NA |
| XR_0017543         | ARFGAP1 | 0.026886        | 55738  | ADP ribosylation factor GTPase activating protein 1, transcript variant X7          | misc_R       |

|                |         |                 |       |                                                                 |          |
|----------------|---------|-----------------|-------|-----------------------------------------------------------------|----------|
| 30.2           |         | 6               |       |                                                                 | NA       |
| NM_014825.3    | URB1    | 0.000452<br>538 | 9875  | URB1 ribosome biogenesis homolog                                | mRNA     |
| NM_014825.3    | URB1    | 3.40E-06        | 9875  | URB1 ribosome biogenesis homolog                                | mRNA     |
| NM_014825.3    | URB1    | 0.036449<br>2   | 9875  | URB1 ribosome biogenesis homolog                                | mRNA     |
| NM_001350335.2 | CFAP298 | 0.013087<br>7   | 56683 | cilia and flagella associated protein 298, transcript variant 3 | mRNA     |
| NM_005441.3    | CHAF1B  | 0.009268<br>78  | 8208  | chromatin assembly factor 1 subunit B                           | mRNA     |
| XM_005261052.1 | TTC3    | 0.011017<br>4   | 7267  | tetratricopeptide repeat domain 3, transcript variant X8        | mRNA     |
| XR_002958632.1 | TTC3    | 0.000307<br>575 | 7267  | tetratricopeptide repeat domain 3, transcript variant X17       | misc_RNA |
| XM_005261052.1 | TTC3    | 0.021103<br>3   | 7267  | tetratricopeptide repeat domain 3, transcript variant X8        | mRNA     |
| XM_005261      | TTC3    | 0.018591        | 7267  | tetratricopeptide repeat domain 3, transcript variant X8        | mRNA     |

|                    |                |                 |        |                                                                                          |         |
|--------------------|----------------|-----------------|--------|------------------------------------------------------------------------------------------|---------|
| 052.1              |                | 3               |        |                                                                                          |         |
| NM_001848.<br>3    | COL6A1         | 2.09E-07        | 1291   | collagen type VI alpha 1 chain                                                           | mRNA    |
| NM_001145<br>436.2 | LSS            | 7.11E-06        | 4047   | lanosterol synthase, transcript variant 3                                                | mRNA    |
| NR_110566.<br>1    | MCM3AP-AS<br>1 | 0.028282<br>8   | 114044 | MCM3AP antisense RNA 1, transcript variant 3                                             | lnc_RNA |
| XM_005261<br>205.4 | MCM3AP         | 0.000452<br>538 | 8888   | minichromosome maintenance complex component 3 associated protein, transcript variant X3 | mRNA    |
| XM_005261<br>205.4 | MCM3AP         | 0.002538<br>27  | 8888   | minichromosome maintenance complex component 3 associated protein, transcript variant X3 | mRNA    |
| XM_024452<br>082.1 | PCNT           | 0.043385<br>8   | 5116   | pericentrin, transcript variant X5                                                       | mRNA    |
| NM_014339.<br>7    | IL17RA         | 0.015633<br>2   | 23765  | interleukin 17 receptor A, transcript variant 1                                          | mRNA    |
| NM_014339.<br>7    | IL17RA         | 0.007286<br>68  | 23765  | interleukin 17 receptor A, transcript variant 1                                          | mRNA    |
| XM_024452          | HDHD5          | 8.48E-05        | 27440  | haloacid dehalogenase like hydrolase domain containing 5, transcript variant X3          | mRNA    |

|                |          |            |       |                                                                                                  |          |
|----------------|----------|------------|-------|--------------------------------------------------------------------------------------------------|----------|
| 232.1          |          |            |       |                                                                                                  |          |
| NM_015241.3    | MICAL3   | 0.00358226 | 57553 | microtubule associated monooxygenase, calponin and LIM domain containing 3, transcript variant 1 | mRNA     |
| NM_001122731.2 | MICAL3   | 0.00321651 | 57553 | microtubule associated monooxygenase, calponin and LIM domain containing 3, transcript variant 3 | mRNA     |
| NM_003325.4    | HIRA     | 3.69E-06   | 7290  | histone cell cycle regulator                                                                     | mRNA     |
| XR_937868.1    | PI4KA    | 0.0364492  | 5297  | phosphatidylinositol 4-kinase alpha, transcript variant X3                                       | misc_RNA |
| XR_937868.1    | PI4KA    | 6.15E-07   | 5297  | phosphatidylinositol 4-kinase alpha, transcript variant X3                                       | misc_RNA |
| NM_021574.3    | BCR      | 0.0282828  | 613   | BCR activator of RhoGEF and GTPase, transcript variant 2                                         | mRNA     |
| XM_024452185.1 | CABIN1   | 0.00240192 | 23523 | calcineurin binding protein 1, transcript variant X3                                             | mRNA     |
| NM_001386930.1 | KIAA1671 | 1.06E-05   | 85379 | KIAA1671, transcript variant 1                                                                   | mRNA     |
| NM_001386      | KIAA1671 | 0.000212   | 85379 | KIAA1671, transcript variant 1                                                                   | mRNA     |

|                    |        |                |       |                                                                            |              |
|--------------------|--------|----------------|-------|----------------------------------------------------------------------------|--------------|
| 930.1              |        | 686            |       |                                                                            |              |
| XR_0017553<br>46.1 | THOC5  | 0.001169<br>38 | 8563  | THO complex 5, transcript variant X7                                       | misc_R<br>NA |
| NM_153051.<br>3    | MTMR3  | 0.011017<br>4  | 8897  | myotubularin related protein 3, transcript variant 2                       | mRNA         |
| NM_005877.<br>6    | SF3A1  | 7.51E-05       | 10291 | splicing factor 3a subunit 1                                               | mRNA         |
| NM_014941.<br>3    | MORC2  | 0.010431<br>9  | 22880 | MORC family CW-type zinc finger 2, transcript variant 3                    | mRNA         |
| NM_001257<br>990.2 | FBXO7  | 0.021103<br>3  | 25793 | F-box protein 7, transcript variant 3                                      | mRNA         |
| NM_002133.<br>3    | HMOX1  | 0.002663<br>3  | 3162  | heme oxygenase 1                                                           | mRNA         |
| NM_002473.<br>6    | MYH9   | 7.00E-07       | 4627  | myosin heavy chain 9                                                       | mRNA         |
| NR_156418.<br>2    | EIF3D  | 0.001169<br>38 | 8664  | eukaryotic translation initiation factor 3 subunit D, transcript variant 2 | misc_R<br>NA |
| NM_014550.         | CARD10 | 0.004766       | 29775 | caspase recruitment domain family member 10                                | mRNA         |

|                    |         |                 |       |                                                                                  |              |
|--------------------|---------|-----------------|-------|----------------------------------------------------------------------------------|--------------|
| 4                  |         | 76              |       |                                                                                  |              |
| XM_005261<br>791.3 | MICALL1 | 0.000618<br>347 | 85377 | MICAL like 1, transcript variant X4                                              | mRNA         |
| NM_015140.<br>4    | TTL12   | 1.14E-07        | 23170 | tubulin tyrosine ligase like 12                                                  | mRNA         |
| NM_016426.<br>7    | GTSE1   | 0.000212<br>686 | 51512 | G2 and S-phase expressed 1                                                       | mRNA         |
| NM_001378<br>328.1 | CELSR1  | 0.000618<br>347 | 9620  | cadherin EGF LAG seven-pass G-type receptor 1, transcript variant 1              | mRNA         |
| XM_011530<br>553.1 | CELSR1  | 0.007700<br>01  | 9620  | cadherin EGF LAG seven-pass G-type receptor 1, transcript variant X2             | mRNA         |
| NM_001376<br>881.1 | PLXNB2  | 0.001900<br>81  | 23654 | plexin B2, transcript variant 19                                                 | mRNA         |
| XM_024453<br>798.1 | BHLHE40 | 0.002663<br>3   | 8553  | basic helix-loop-helix family member e40, transcript variant X1                  | mRNA         |
| XR_0017403<br>83.1 | EDEM1   | 0.000822<br>568 | 9695  | ER degradation enhancing alpha-mannosidase like protein 1, transcript variant X1 | misc_R<br>NA |
| XR_0017403         | EDEM1   | 0.005747        | 9695  | ER degradation enhancing alpha-mannosidase like protein 1, transcript variant X1 | misc_R       |

|                    |        |                 |       |                                                                                     |              |
|--------------------|--------|-----------------|-------|-------------------------------------------------------------------------------------|--------------|
| 83.1               |        | 95              |       |                                                                                     | NA           |
| XM_017006<br>774.1 | SETD5  | 0.000777<br>792 | 55209 | SET domain containing 5, transcript variant X14                                     | mRNA         |
| XM_017007<br>176.2 | TMEM43 | 0.007700<br>01  | 79188 | transmembrane protein 43, transcript variant X1                                     | mRNA         |
| NM_001354<br>730.2 | XPC    | 0.004766<br>76  | 7508  | XPC complex subunit, DNA damage recognition and repair factor, transcript variant 6 | mRNA         |
| NR_164763.<br>1    | CAPN7  | 0.003582<br>26  | 23473 | calpain 7, transcript variant 10                                                    | misc_R<br>NA |
| NM_001349<br>078.2 | TBC1D5 | 0.015633<br>2   | 9779  | TBC1 domain family member 5, transcript variant 8                                   | mRNA         |
| NM_001354<br>715.2 | THRB   | 0.019824<br>4   | 7068  | thyroid hormone receptor beta, transcript variant 12                                | mRNA         |
| XM_011534<br>057.3 | TOP2B  | 0.000880<br>173 | 7155  | DNA topoisomerase II beta, transcript variant X1                                    | mRNA         |
| NM_001330<br>700.2 | TOP2B  | 4.60E-10        | 7155  | DNA topoisomerase II beta, transcript variant 1                                     | mRNA         |
| XM_017005          | CLASP2 | 0.002273        | 23122 | cytoplasmic linker associated protein 2, transcript variant X5                      | mRNA         |

|                    |         |                 |       |                                                                    |              |
|--------------------|---------|-----------------|-------|--------------------------------------------------------------------|--------------|
| 948.1              |         | 62              |       |                                                                    |              |
| NM_001162<br>429.3 | PDCD6IP | 0.015633<br>2   | 10015 | programmed cell death 6 interacting protein, transcript variant 2  | mRNA         |
| XM_017005<br>911.1 | TRAK1   | 0.026886<br>6   | 22906 | trafficking kinesin protein 1, transcript variant X9               | mRNA         |
| XR_940392.<br>3    | SACM1L  | 2.43E-05        | 22908 | SAC1 like phosphatidylinositide phosphatase, transcript variant X2 | misc_R<br>NA |
| NM_001365<br>116.2 | NBEAL2  | 0.007286<br>68  | 23218 | neurobeachin like 2, transcript variant 2                          | mRNA         |
| NM_001384<br>776.1 | MAP4    | 3.40E-13        | 4134  | microtubule associated protein 4, transcript variant 37            | mRNA         |
| NM_001384<br>806.1 | MAP4    | 0.018591<br>3   | 4134  | microtubule associated protein 4, transcript variant 65            | mRNA         |
| NM_001320<br>583.2 | QRICH1  | 0.004497<br>29  | 54870 | glutamine rich 1, transcript variant 6                             | mRNA         |
| NM_001389<br>602.1 | USP19   | 0.000125<br>229 | 10869 | ubiquitin specific peptidase 19, transcript variant 24             | mRNA         |
| NM_001304          | ALAS1   | 8.48E-07        | 211   | 5'-aminolevulinate synthase 1, transcript variant 4                | mRNA         |

|                    |       |                 |       |                                                                                  |      |
|--------------------|-------|-----------------|-------|----------------------------------------------------------------------------------|------|
| 444.1              |       |                 |       |                                                                                  |      |
| NM_001304<br>444.1 | ALAS1 | 0.002135<br>81  | 211   | 5'-aminolevulinate synthase 1, transcript variant 4                              | mRNA |
| XM_011534<br>136.2 | WDR82 | 0.000338<br>213 | 80335 | WD repeat domain 82, transcript variant X1                                       | mRNA |
| NM_025222.<br>4    | WDR82 | 5.37E-05        | 80335 | WD repeat domain 82                                                              | mRNA |
| XM_011534<br>151.3 | BAP1  | 1.59E-05        | 8314  | BRCA1 associated protein 1, transcript variant X3                                | mRNA |
| XM_006713<br>384.3 | RFT1  | 0.002135<br>81  | 91869 | RFT1 homolog, transcript variant X4                                              | mRNA |
| NM_212539.<br>2    | PRKCD | 3.00E-08        | 5580  | protein kinase C delta, transcript variant 2                                     | mRNA |
| NM_212539.<br>2    | PRKCD | 0.026886<br>6   | 5580  | protein kinase C delta, transcript variant 2                                     | mRNA |
| XM_011534<br>054.1 | TKT   | 2.13E-06        | 7086  | transketolase, transcript variant X1                                             | mRNA |
| NM_012096.         | APPL1 | 0.022186        | 26060 | adaptor protein, phosphotyrosine interacting with PH domain and leucine zipper 1 | mRNA |

|            |         |          |       |                                                                      |        |
|------------|---------|----------|-------|----------------------------------------------------------------------|--------|
| 3          |         | 4        |       |                                                                      |        |
| NM_007114. | TMF1    | 0.011664 | 7110  | TATA element modulatory factor 1, transcript variant 1               | mRNA   |
| 3          |         | 8        |       |                                                                      |        |
| XR_924220. | CD47    | 0.000323 | 961   | CD47 molecule, transcript variant X10                                | misc_R |
| 2          |         | 968      |       |                                                                      | NA     |
| NM_001690. | ATP6V1A | 0.001676 | 523   | ATPase H <sup>+</sup> transporting V1 subunit A                      | mRNA   |
| 4          |         | 3        |       |                                                                      |        |
| NM_002093. | GSK3B   | 0.034207 | 2932  | glycogen synthase kinase 3 beta, transcript variant 1                | mRNA   |
| 4          |         | 6        |       |                                                                      |        |
| XM_006713  | GOLGB1  | 0.000133 | 2804  | golgin B1, transcript variant X4                                     | mRNA   |
| 588.2      |         | 274      |       |                                                                      |        |
| XM_011512  | GOLGB1  | 0.000160 | 2804  | golgin B1, transcript variant X2                                     | mRNA   |
| 699.3      |         | 289      |       |                                                                      |        |
| XR_427359. | PDIA5   | 0.004022 | 10954 | protein disulfide isomerase family A member 5, transcript variant X1 | misc_R |
| 1          |         | 4        |       |                                                                      | NA     |
| XM_017007  | KALRN   | 0.000178 | 8997  | kalirin RhoGEF kinase, transcript variant X12                        | mRNA   |
| 431.1      |         | 792      |       |                                                                      |        |
| XM_006713  | ITGB5   | 0.000657 | 3693  | integrin subunit beta 5, transcript variant X2                       | mRNA   |

|                    |        |                 |       |                                                                         |      |
|--------------------|--------|-----------------|-------|-------------------------------------------------------------------------|------|
| 630.3              |        | 308             |       |                                                                         |      |
| NM_020733.<br>2    | HEG1   | 0.031976<br>3   | 57493 | heart development protein with EGF like domains 1                       | mRNA |
| NM_032242.<br>4    | PLXNA1 | 0.013087<br>7   | 5361  | plexin A1                                                               | mRNA |
| NM_032242.<br>4    | PLXNA1 | 0.004022<br>4   | 5361  | plexin A1                                                               | mRNA |
| NM_032242.<br>4    | PLXNA1 | 1.42E-06        | 5361  | plexin A1                                                               | mRNA |
| NM_001003<br>794.3 | MGLL   | 0.000822<br>568 | 11343 | monoglyceride lipase, transcript variant 2                              | mRNA |
| XM_011512<br>549.2 | COPG1  | 0.021103<br>3   | 22820 | COPI coat complex subunit gamma 1, transcript variant X1                | mRNA |
| NM_001370<br>344.1 | HMCES  | 0.040914        | 56941 | 5-hydroxymethylcytosine binding, ES cell specific, transcript variant 5 | mRNA |
| NM_014602.<br>3    | PIK3R4 | 0.006445<br>37  | 30849 | phosphoinositide-3-kinase regulatory subunit 4                          | mRNA |
| NM_014602.         | PIK3R4 | 0.015633        | 30849 | phosphoinositide-3-kinase regulatory subunit 4                          | mRNA |

|                    |        |                |       |                                                                                |      |
|--------------------|--------|----------------|-------|--------------------------------------------------------------------------------|------|
| 3                  |        | 2              |       |                                                                                |      |
| NM_001199<br>181.3 | ATP2C1 | 1.64E-07       | 27032 | ATPase secretory pathway Ca <sup>2+</sup> transporting 1, transcript variant 7 | mRNA |
| NM_001199<br>182.2 | ATP2C1 | 0.010431<br>9  | 27032 | ATPase secretory pathway Ca <sup>2+</sup> transporting 1, transcript variant 8 | mRNA |
| NM_001178<br>014.2 | PCCB   | 0.021103<br>3  | 5096  | propionyl-CoA carboxylase subunit beta, transcript variant 2                   | mRNA |
| XM_017006<br>627.1 | PLS1   | 0.003393<br>83 | 5357  | plastin 1, transcript variant X6                                               | mRNA |
| NM_001320<br>222.2 | U2SURP | 0.001316<br>87 | 23350 | U2 snRNP associated SURP domain containing, transcript variant 4               | mRNA |
| NM_001002<br>800.3 | SMC4   | 0.028282<br>8  | 10051 | structural maintenance of chromosomes 4, transcript variant 2                  | mRNA |
| NM_015028.<br>4    | TNIK   | 0.001039<br>18 | 23043 | TRAF2 and NCK interacting kinase, transcript variant 1                         | mRNA |
| NM_001349<br>099.2 | ECT2   | 0.006074<br>62 | 1894  | epithelial cell transforming 2, transcript variant 9                           | mRNA |
| XM_006713          | ECT2   | 6.15E-07       | 1894  | epithelial cell transforming 2, transcript variant X6                          | mRNA |

|            |         |          |       |                                                                                 |      |
|------------|---------|----------|-------|---------------------------------------------------------------------------------|------|
| 524.4      |         |          |       |                                                                                 |      |
| XM_011512  | ATP11B  | 0.000227 | 23200 | ATPase phospholipid transporting 11B (putative), transcript variant X3          | mRNA |
| 593.2      |         | 166      |       |                                                                                 |      |
| XM_017005  | IGF2BP2 | 0.006864 | 10644 | insulin like growth factor 2 mRNA binding protein 2, transcript variant X7      | mRNA |
| 562.1      |         | 88       |       |                                                                                 |      |
| NM_130832. | OPA1    | 0.028282 | 4976  | OPA1 mitochondrial dynamin like GTPase, transcript variant 3                    | mRNA |
| 3          |         | 8        |       |                                                                                 |      |
| NM_001354  | OPA1    | 0.000105 | 4976  | OPA1 mitochondrial dynamin like GTPase, transcript variant 9                    | mRNA |
| 663.2      |         | 814      |       |                                                                                 |      |
| XM_011513  | ATP13A3 | 5.95E-06 | 79572 | ATPase 13A3, transcript variant X6                                              | mRNA |
| 124.3      |         |          |       |                                                                                 |      |
| NM_001367  | ATP13A3 | 7.04E-08 | 79572 | ATPase 13A3, transcript variant 2                                               | mRNA |
| 549.1      |         |          |       |                                                                                 |      |
| XM_017006  | LSG1    | 0.000380 | 55341 | large 60S subunit nuclear export GTPase 1, transcript variant X1                | mRNA |
| 796.1      |         | 287      |       |                                                                                 |      |
| XM_011512  | ACAP2   | 0.028282 | 23527 | ArfGAP with coiled-coil, ankyrin repeat and PH domains 2, transcript variant X8 | mRNA |
| 605.2      |         | 8        |       |                                                                                 |      |
| XM_006713  | MELTF   | 0.000101 | 4241  | melanotransferrin, transcript variant X2                                        | mRNA |

|                    |         |                 |      |                                                                    |      |
|--------------------|---------|-----------------|------|--------------------------------------------------------------------|------|
| 643.3              |         | 311             |      |                                                                    |      |
| XM_017007<br>544.1 | RUBCN   | 0.040914        | 9711 | rubicon autophagy regulator, transcript variant X9                 | mRNA |
| XM_011513<br>425.2 | GAK     | 0.002135<br>81  | 2580 | cyclin G associated kinase, transcript variant X1                  | mRNA |
| XM_011513<br>425.2 | GAK     | 0.008685<br>41  | 2580 | cyclin G associated kinase, transcript variant X1                  | mRNA |
| NM_012318.<br>3    | LETM1   | 1.11E-08        | 3954 | leucine zipper and EF-hand containing transmembrane protein 1      | mRNA |
| NM_001256<br>666.2 | FAM193A | 0.048575        | 8603 | family with sequence similarity 193 member A, transcript variant 2 | mRNA |
| NM_002111.<br>8    | HTT     | 0.000273<br>438 | 3064 | huntingtin, transcript variant 2                                   | mRNA |
| NM_002111.<br>8    | HTT     | 0.001484<br>02  | 3064 | huntingtin, transcript variant 2                                   | mRNA |
| NM_002111.<br>8    | HTT     | 2.43E-07        | 3064 | huntingtin, transcript variant 2                                   | mRNA |
| NM_001388          | HTT     | 3.40E-13        | 3064 | huntingtin, transcript variant 1                                   | mRNA |

|            |        |          |       |                                                                         |          |
|------------|--------|----------|-------|-------------------------------------------------------------------------|----------|
| 492.1      |        |          |       |                                                                         |          |
| NM_001388  | HTT    | 0.028282 | 3064  | huntingtin, transcript variant 1                                        | mRNA     |
| 492.1      |        | 8        |       |                                                                         |          |
| NM_001388  | HTT    | 8.96E-06 | 3064  | huntingtin, transcript variant 1                                        | mRNA     |
| 492.1      |        |          |       |                                                                         |          |
| NM_002111. | HTT    | 5.89E-07 | 3064  | huntingtin, transcript variant 2                                        | mRNA     |
| 8          |        |          |       |                                                                         |          |
| NR_110005. | LRPAP1 | 0.000187 | 4043  | LDL receptor related protein associated protein 1, transcript variant 2 | misc_RNA |
| 2          |        | 923      |       |                                                                         |          |
| XM_011513  | PGM2   | 0.018591 | 55276 | phosphoglucosmutase 2, transcript variant X1                            | mRNA     |
| 711.2      |        | 3        |       |                                                                         |          |
| NM_001204  | RFC1   | 3.57E-05 | 5981  | replication factor C subunit 1, transcript variant 2                    | mRNA     |
| 747.2      |        |          |       |                                                                         |          |
| NM_003359. | UGDH   | 0.000358 | 7358  | UDP-glucose 6-dehydrogenase, transcript variant 1                       | mRNA     |
| 4          |        | 192      |       |                                                                         |          |
| NM_001347  | PDGFRA | 3.77E-05 | 5156  | platelet derived growth factor receptor alpha, transcript variant 2     | mRNA     |
| 827.2      |        |          |       |                                                                         |          |
| NM_001347  | PDGFRA | 0.000257 | 5156  | platelet derived growth factor receptor alpha, transcript variant 2     | mRNA     |

|            |          |          |       |                                                                                                                               |      |
|------------|----------|----------|-------|-------------------------------------------------------------------------------------------------------------------------------|------|
| 827.2      |          | 885      |       |                                                                                                                               |      |
| XM_024454  | CLOCK    | 0.028282 | 9575  | clock circadian regulator, transcript variant X3                                                                              | mRNA |
| 284.1      |          | 8        |       |                                                                                                                               |      |
| NM_001392  | PAICS    | 0.006864 | 10606 | phosphoribosylaminoimidazole carboxylase and<br>phosphoribosylaminoimidazolesuccinocarboxamide synthase, transcript variant 5 | mRNA |
| 011.1      |          | 88       |       |                                                                                                                               |      |
| NM_000938. | POLR2B   | 0.026886 | 5431  | RNA polymerase II subunit B, transcript variant 1                                                                             | mRNA |
| 3          |          | 6        |       |                                                                                                                               |      |
| NM_000938. | POLR2B   | 3.40E-13 | 5431  | RNA polymerase II subunit B, transcript variant 1                                                                             | mRNA |
| 3          |          |          |       |                                                                                                                               |      |
| NM_000938. | POLR2B   | 8.89E-09 | 5431  | RNA polymerase II subunit B, transcript variant 1                                                                             | mRNA |
| 3          |          |          |       |                                                                                                                               |      |
| NM_001031  | YTHDC1   | 0.001676 | 91746 | YTH domain containing 1, transcript variant 1                                                                                 | mRNA |
| 732.4      |          | 3        |       |                                                                                                                               |      |
| NM_015574. | ANKRD17  | 0.000482 | 26057 | ankyrin repeat domain 17, transcript variant 4                                                                                | mRNA |
| 2          |          | 835      |       |                                                                                                                               |      |
| NM_003715. | USO1     | 0.013087 | 8615  | USO1 vesicle transport factor, transcript variant 2                                                                           | mRNA |
| 4          |          | 7        |       |                                                                                                                               |      |
| XM_017008  | SEPTIN11 | 0.000425 | 55752 | septin 11, transcript variant X3                                                                                              | mRNA |

|                    |                  |                |               |                                                                     |             |
|--------------------|------------------|----------------|---------------|---------------------------------------------------------------------|-------------|
| 402.1              |                  | 096            |               |                                                                     |             |
| XR_244659.<br>4    | LOC10192886<br>4 | 0.003036<br>24 | 101928<br>864 | uncharacterized LOC101928864                                        | lnc_RN<br>A |
| XM_011532<br>399.2 | CCNG2            | 0.004497<br>29 | 901           | cyclin G2, transcript variant X2                                    | mRNA        |
| NM_001318<br>119.2 | SEC31A           | 0.022186<br>4  | 22872         | SEC31 homolog A, COPII coat complex component, transcript variant 9 | mRNA        |
| NM_001077<br>207.4 | SEC31A           | 0.012354       | 22872         | SEC31 homolog A, COPII coat complex component, transcript variant 5 | mRNA        |
| XM_017007<br>906.2 | WDFY3            | 7.51E-05       | 23001         | WD repeat and FYVE domain containing 3, transcript variant X2       | mRNA        |
| XM_017007<br>906.2 | WDFY3            | 0.007700<br>01 | 23001         | WD repeat and FYVE domain containing 3, transcript variant X2       | mRNA        |
| NM_001256<br>426.2 | PDLIM5           | 0.001578<br>44 | 10611         | PDZ and LIM domain 5, transcript variant 6                          | mRNA        |
| NM_000671.<br>4    | ADH5             | 0.030044<br>3  | 128           | alcohol dehydrogenase 5 (class III), chi polypeptide                | mRNA        |
| NM_000944.         | PPP3CA           | 0.001578       | 5530          | protein phosphatase 3 catalytic subunit alpha, transcript variant 1 | mRNA        |

|                    |          |                 |       |                                                                                                                          |              |
|--------------------|----------|-----------------|-------|--------------------------------------------------------------------------------------------------------------------------|--------------|
| 5                  |          | 44              |       |                                                                                                                          |              |
| NM_001382<br>627.1 | NFKB1    | 0.045986        | 4790  | nuclear factor kappa B subunit 1, transcript variant 6                                                                   | mRNA         |
| NM_001382<br>627.1 | NFKB1    | 0.048575        | 4790  | nuclear factor kappa B subunit 1, transcript variant 6                                                                   | mRNA         |
| NM_001221.<br>4    | CAMK2D   | 0.005433<br>82  | 817   | calcium/calmodulin dependent protein kinase II delta, transcript variant 3                                               | mRNA         |
| NM_014822.<br>4    | SEC24D   | 0.007286<br>68  | 9871  | SEC24 homolog D, COPII coat complex component, transcript variant 1                                                      | mRNA         |
| NM_014822.<br>4    | SEC24D   | 0.004255<br>39  | 9871  | SEC24 homolog D, COPII coat complex component, transcript variant 1                                                      | mRNA         |
| XM_011532<br>324.1 | KIAA1109 | 0.036449<br>2   | 84162 | KIAA1109, transcript variant X6                                                                                          | mRNA         |
| NM_032557.<br>6    | USP38    | 0.000242<br>029 | 84640 | ubiquitin specific peptidase 38, transcript variant 1                                                                    | mRNA         |
| XR_0017413<br>38.1 | SMARCA5  | 0.000141<br>056 | 8467  | SWI/SNF related, matrix associated, actin dependent regulator of chromatin, subfamily a, member 5, transcript variant X1 | misc_R<br>NA |
| NM_002940.         | ABCE1    | 3.37E-07        | 6059  | ATP binding cassette subfamily E member 1, transcript variant 1                                                          | mRNA         |

|                    |          |                 |        |                                                                               |      |
|--------------------|----------|-----------------|--------|-------------------------------------------------------------------------------|------|
| 3                  |          |                 |        |                                                                               |      |
| NM_001378<br>126.1 | SH3D19   | 0.000105<br>814 | 152503 | SH3 domain containing 19, transcript variant 9                                | mRNA |
| NM_021871.<br>4    | FGA      | 0.011664<br>8   | 2243   | fibrinogen alpha chain, transcript variant alpha                              | mRNA |
| NM_000508.<br>5    | FGA      | 0.018591<br>3   | 2243   | fibrinogen alpha chain, transcript variant alpha-E                            | mRNA |
| NM_001243<br>372.2 | CLCN3    | 0.026886<br>6   | 1182   | chloride voltage-gated channel 3, transcript variant a                        | mRNA |
| NM_021942.<br>6    | TRAPPC11 | 0.001169<br>38  | 60684  | trafficking protein particle complex subunit 11, transcript variant 1         | mRNA |
| NM_021942.<br>6    | TRAPPC11 | 0.001316<br>87  | 60684  | trafficking protein particle complex subunit 11, transcript variant 1         | mRNA |
| NM_020827.<br>3    | CFAP97   | 0.048575        | 57587  | cilia and flagella associated protein 97, transcript variant 1                | mRNA |
| XM_017009<br>685.2 | SDHA     | 0.040914        | 6389   | succinate dehydrogenase complex flavoprotein subunit A, transcript variant X1 | mRNA |
| XM_005248          | TPPP     | 0.045986        | 11076  | tubulin polymerization promoting protein, transcript variant X3               | mRNA |

|            |         |          |       |                                                                   |        |
|------------|---------|----------|-------|-------------------------------------------------------------------|--------|
| 237.3      |         |          |       |                                                                   |        |
| XM_024446  | CLPTM1L | 0.017620 | 81037 | CLPTM1 like, transcript variant X3                                | mRNA   |
| 221.1      |         | 9        |       |                                                                   |        |
| NM_001270  | MARCHF6 | 0.000695 | 10299 | membrane associated ring-CH-type finger 6, transcript variant 2   | mRNA   |
| 660.2      |         | 991      |       |                                                                   |        |
| NR_134469. | TRIO    | 0.030044 | 7204  | trio Rho guanine nucleotide exchange factor, transcript variant 2 | misc_R |
| 2          |         | 3        |       |                                                                   | NA     |
| XM_005248  | MYO10   | 1.85E-06 | 4651  | myosin X, transcript variant X4                                   | mRNA   |
| 307.2      |         |          |       |                                                                   |        |
| XM_011514  | MYO10   | 2.02E-05 | 4651  | myosin X, transcript variant X3                                   | mRNA   |
| 046.2      |         |          |       |                                                                   |        |
| XM_006714  | MYO10   | 0.001106 | 4651  | myosin X, transcript variant X1                                   | mRNA   |
| 475.3      |         | 25       |       |                                                                   |        |
| NM_016107. | ZFR     | 1.14E-07 | 51663 | zinc finger RNA binding protein                                   | mRNA   |
| 5          |         |          |       |                                                                   |        |
| NR_144318. | ZFR     | 0.000510 | 51663 | zinc finger RNA binding protein                                   | misc_R |
| 2          |         | 829      |       |                                                                   | NA     |
| NM_001258  | TARS1   | 0.002663 | 6897  | threonyl-tRNA synthetase 1, transcript variant 2                  | mRNA   |

|                |        |                |        |                                                               |          |
|----------------|--------|----------------|--------|---------------------------------------------------------------|----------|
| 437.1          |        | 3              |        |                                                               |          |
| NR_169875.1    | TTC23L | 0.031976<br>3  | 153657 | tetratricopeptide repeat domain 23 like, transcript variant 8 | misc_RNA |
| NM_001243120.2 | SKP2   | 0.004022<br>4  | 6502   | S-phase kinase associated protein 2, transcript variant 3     | mRNA     |
| XM_017009330.2 | NIPBL  | 0.004255<br>39 | 25836  | NIPBL cohesin loading factor, transcript variant X7           | mRNA     |
| NM_003999.3    | OSMR   | 0.007286<br>68 | 9180   | oncostatin M receptor, transcript variant 1                   | mRNA     |
| NR_073104.2    | ITGA2  | 3.40E-13       | 3673   | integrin subunit alpha 2, transcript variant 3                | misc_RNA |
| NR_073104.2    | ITGA2  | 8.11E-10       | 3673   | integrin subunit alpha 2, transcript variant 3                | misc_RNA |
| NR_073104.2    | ITGA2  | 3.40E-13       | 3673   | integrin subunit alpha 2, transcript variant 3                | misc_RNA |
| NR_073105.2    | ITGA2  | 3.40E-13       | 3673   | integrin subunit alpha 2, transcript variant 4                | misc_RNA |
| NM_001345      | DHX29  | 0.028282       | 54505  | DExH-box helicase 29, transcript variant 3                    | mRNA     |

|                    |       |                 |               |                                                                                      |      |
|--------------------|-------|-----------------|---------------|--------------------------------------------------------------------------------------|------|
| 965.2              |       | 8               |               |                                                                                      |      |
| NM_175767.<br>3    | IL6ST | 9.53E-05        | 3572          | interleukin 6 cytokine family signal transducer, transcript variant 2                | mRNA |
| NM_175767.<br>3    | IL6ST | 1.59E-05        | 3572          | interleukin 6 cytokine family signal transducer, transcript variant 2                | mRNA |
| NM_001203<br>246.2 | GPBP1 | 0.043385<br>8   | 65056         | GC-rich promoter binding protein 1, transcript variant 4                             | mRNA |
| NM_001006<br>600.3 | ERBIN | 0.017620<br>9   | 55914         | erbb2 interacting protein, transcript variant 7                                      | mRNA |
| NM_001297<br>651.2 | MAST4 | 0.002401<br>92  | 375449        | microtubule associated serine/threonine kinase family member 4, transcript variant 7 | mRNA |
| XM_017008<br>913.2 | OCLN  | 3.40E-13        | 100506<br>658 | occludin, transcript variant X1                                                      | mRNA |
| NM_018429.<br>3    | BDP1  | 0.000581<br>772 | 55814         | B double prime 1, subunit of RNA polymerase III transcription initiation factor IIIB | mRNA |
| NM_022132.<br>5    | MCCC2 | 9.53E-05        | 64087         | methycrotonyl-CoA carboxylase subunit 2, transcript variant 1                        | mRNA |
| NM_001364          | TNPO1 | 0.001316        | 3842          | transportin 1, transcript variant 3                                                  | mRNA |

|            |         |          |        |                                                                        |          |
|------------|---------|----------|--------|------------------------------------------------------------------------|----------|
| 292.3      |         | 87       |        |                                                                        |          |
| NM_001130  | HMGCR   | 0.009859 | 3156   | 3-hydroxy-3-methylglutaryl-CoA reductase, transcript variant 2         | mRNA     |
| 996.2      |         | 34       |        |                                                                        |          |
| XM_011543  | HMGCR   | 0.003216 | 3156   | 3-hydroxy-3-methylglutaryl-CoA reductase, transcript variant X2        | mRNA     |
| 358.1      |         | 51       |        |                                                                        |          |
| XM_024454  | IQGAP2  | 3.77E-05 | 10788  | IQ motif containing GTPase activating protein 2, transcript variant X1 | mRNA     |
| 336.1      |         |          |        |                                                                        |          |
| NR_104285. | CAST    | 0.048575 | 831    | calpastatin, transcript variant 15                                     | misc_RNA |
| 2          |         |          |        |                                                                        |          |
| NM_000414. | HSD17B4 | 0.006445 | 3295   | hydroxysteroid 17-beta dehydrogenase 4, transcript variant 2           | mRNA     |
| 4          |         | 37       |        |                                                                        |          |
| NM_001374  | HSD17B4 | 8.86E-07 | 3295   | hydroxysteroid 17-beta dehydrogenase 4, transcript variant 9           | mRNA     |
| 500.1      |         |          |        |                                                                        |          |
| NM_001349  | GRAMD2B | 0.038533 | 65983  | GRAM domain containing 2B, transcript variant 6                        | mRNA     |
| 541.2      |         | 3        |        |                                                                        |          |
| NM_001182. | ALDH7A1 | 0.009859 | 501    | aldehyde dehydrogenase 7 family member A1, transcript variant 1        | mRNA     |
| 5          |         | 34       |        |                                                                        |          |
| NM_001286  | PRRC1   | 0.000425 | 133619 | proline rich coiled-coil 1, transcript variant 1                       | mRNA     |

|            |        |          |       |                                                                  |      |
|------------|--------|----------|-------|------------------------------------------------------------------|------|
| 808.2      |        | 096      |       |                                                                  |      |
| NM_001033  | SAR1B  | 0.000323 | 51128 | secretion associated Ras related GTPase 1B, transcript variant 1 | mRNA |
| 503.3      |        | 968      |       |                                                                  |      |
| NM_004661. | CDC23  | 0.009859 | 8697  | cell division cycle 23                                           | mRNA |
| 4          |        | 34       |       |                                                                  |      |
| XM_011543  | KDM3B  | 0.004497 | 51780 | lysine demethylase 3B, transcript variant X2                     | mRNA |
| 489.2      |        | 29       |       |                                                                  |      |
| NM_001323  | CTNNA1 | 5.95E-06 | 1495  | catenin alpha 1, transcript variant 23                           | mRNA |
| 999.1      |        |          |       |                                                                  |      |
| NM_001194  | MATR3  | 8.03E-05 | 9782  | matrin 3, transcript variant 5                                   | mRNA |
| 956.2      |        |          |       |                                                                  |      |
| NM_001194  | MATR3  | 3.24E-07 | 9782  | matrin 3, transcript variant 5                                   | mRNA |
| 956.2      |        |          |       |                                                                  |      |
| XM_024454  | DIAPH1 | 3.69E-06 | 1729  | diaphanous related formin 1, transcript variant X4               | mRNA |
| 387.1      |        |          |       |                                                                  |      |
| XM_024454  | DIAPH1 | 0.000178 | 1729  | diaphanous related formin 1, transcript variant X4               | mRNA |
| 387.1      |        | 792      |       |                                                                  |      |
| XM_024454  | DIAPH1 | 0.000695 | 1729  | diaphanous related formin 1, transcript variant X4               | mRNA |

|                 |         |            |        |                                                                  |      |
|-----------------|---------|------------|--------|------------------------------------------------------------------|------|
| 387.1           |         | 991        |        |                                                                  |      |
| NM_020117.11    | LARS1   | 8.76E-08   | 51520  | leucyl-tRNA synthetase 1, transcript variant 1                   | mRNA |
| NM_020117.11    | LARS1   | 3.40E-06   | 51520  | leucyl-tRNA synthetase 1, transcript variant 1                   | mRNA |
| XM_011537.662.1 | RBM27   | 0.00770001 | 54439  | RNA binding motif protein 27, transcript variant X7              | mRNA |
| XM_011537.577.2 | STK32A  | 0.0148488  | 202374 | serine/threonine kinase 32A, transcript variant X2               | mRNA |
| XM_024446.223.1 | FBXO38  | 0.0016763  | 81545  | F-box protein 38, transcript variant X2                          | mRNA |
| NM_014983.3     | HMGXB3  | 1.14E-07   | 22993  | HMG-box containing 3, transcript variant 1                       | mRNA |
| NM_005754.3     | G3BP1   | 1.70E-09   | 10146  | G3BP stress granule assembly factor 1, transcript variant 1      | mRNA |
| NM_198321.4     | GALNT10 | 0.0156332  | 55568  | polypeptide N-acetylgalactosaminyltransferase 10                 | mRNA |
| NM_001252       | GEMIN5  | 0.010431   | 25929  | gem nuclear organelle associated protein 5, transcript variant 2 | mRNA |

|                    |        |                 |       |                                                                             |              |
|--------------------|--------|-----------------|-------|-----------------------------------------------------------------------------|--------------|
| 156.2              |        | 9               |       |                                                                             |              |
| NM_001364<br>018.1 | CCNG1  | 1.87E-09        | 900   | cyclin G1, transcript variant 4                                             | mRNA         |
| NM_033645.<br>3    | FBXW11 | 0.015633<br>2   | 23291 | F-box and WD repeat domain containing 11, transcript variant 1              | mRNA         |
| NM_001308<br>191.2 | CPEB4  | 0.040914        | 80315 | cytoplasmic polyadenylation element binding protein 4, transcript variant 3 | mRNA         |
| XM_017009<br>985.1 | THOC3  | 3.87E-06        | 84321 | THO complex 3, transcript variant X1                                        | mRNA         |
| NM_001291<br>980.2 | FGFR4  | 0.000657<br>308 | 2264  | fibroblast growth factor receptor 4, transcript variant 4                   | mRNA         |
| NM_001291<br>980.2 | FGFR4  | 0.004497<br>29  | 2264  | fibroblast growth factor receptor 4, transcript variant 4                   | mRNA         |
| XM_024446<br>153.1 | NSD1   | 0.011664<br>8   | 64324 | nuclear receptor binding SET domain protein 1, transcript variant X4        | mRNA         |
| XR_0017421<br>64.1 | CNOT6  | 0.014848<br>8   | 57472 | CCR4-NOT transcription complex subunit 6, transcript variant X10            | misc_R<br>NA |
| XR_0017421         | CNOT6  | 0.014848        | 57472 | CCR4-NOT transcription complex subunit 6, transcript variant X10            | misc_R       |

|                    |         |                 |       |                                                                        |      |
|--------------------|---------|-----------------|-------|------------------------------------------------------------------------|------|
| 64.1               |         | 8               |       |                                                                        | NA   |
| XM_017011<br>415.2 | PRPF4B  | 0.008685<br>41  | 8899  | pre-mRNA processing factor 4B, transcript variant X5                   | mRNA |
| XM_011514<br>546.2 | HIVEP1  | 0.000822<br>568 | 3096  | HIVEP zinc finger 1, transcript variant X1                             | mRNA |
| XM_005249<br>507.3 | NUP153  | 1.66E-09        | 9972  | nucleoporin 153, transcript variant X2                                 | mRNA |
| XM_017011<br>013.1 | CARMIL1 | 9.53E-05        | 55604 | capping protein regulator and myosin 1 linker 1, transcript variant X8 | mRNA |
| NM_001387<br>911.1 | DDR1    | 1.51E-09        | 780   | discoidin domain receptor tyrosine kinase 1, transcript variant 29     | mRNA |
| XM_017011<br>283.2 | BAG6    | 0.000510<br>829 | 7917  | BAG cochaperone 6, transcript variant X11                              | mRNA |
| NM_001387<br>946.1 | BAG6    | 0.000777<br>792 | 7917  | BAG cochaperone 6, transcript variant 11                               | mRNA |
| NM_001136<br>153.2 | ATF6B   | 0.013087<br>7   | 1388  | activating transcription factor 6 beta, transcript variant 2           | mRNA |
| NM_002224.         | ITPR3   | 0.001039        | 3710  | inositol 1,4,5-trisphosphate receptor type 3                           | mRNA |

|                    |         |                |       |                                                                      |      |
|--------------------|---------|----------------|-------|----------------------------------------------------------------------|------|
| 4                  |         | 18             |       |                                                                      |      |
| XM_017010<br>832.1 | ITPR3   | 1.64E-08       | 3710  | inositol 1,4,5-trisphosphate receptor type 3, transcript variant X2  | mRNA |
| XM_011514<br>577.3 | ITPR3   | 0.005433<br>82 | 3710  | inositol 1,4,5-trisphosphate receptor type 3, transcript variant X1  | mRNA |
| NM_021705.<br>4    | NFYA    | 6.15E-07       | 4800  | nuclear transcription factor Y subunit alpha, transcript variant 2   | mRNA |
| NM_021705.<br>4    | NFYA    | 7.11E-05       | 4800  | nuclear transcription factor Y subunit alpha, transcript variant 2   | mRNA |
| XM_017010<br>999.1 | TMEM63B | 0.003582<br>26 | 55362 | transmembrane protein 63B, transcript variant X2                     | mRNA |
| NM_002388.<br>6    | MCM3    | 2.43E-05       | 4172  | minichromosome maintenance complex component 3, transcript variant 1 | mRNA |
| XM_017010<br>749.1 | GCLC    | 2.02E-05       | 2729  | glutamate-cysteine ligase catalytic subunit, transcript variant X1   | mRNA |
| NM_001197<br>115.2 | GCLC    | 3.57E-05       | 2729  | glutamate-cysteine ligase catalytic subunit, transcript variant 2    | mRNA |
| XM_017011          | DST     | 0.004497       | 667   | dystonin, transcript variant X26                                     | mRNA |

|            |        |          |       |                                                                       |      |
|------------|--------|----------|-------|-----------------------------------------------------------------------|------|
| 219.1      |        | 29       |       |                                                                       |      |
| XM_017011  | DST    | 0.000187 | 667   | dystonin, transcript variant X17                                      | mRNA |
| 216.2      |        | 923      |       |                                                                       |      |
| XM_017011  | DST    | 0.005079 | 667   | dystonin, transcript variant X6                                       | mRNA |
| 209.1      |        | 4        |       |                                                                       |      |
| XM_017011  | DST    | 3.56E-06 | 667   | dystonin, transcript variant X6                                       | mRNA |
| 209.1      |        |          |       |                                                                       |      |
| XM_017011  | DST    | 0.011664 | 667   | dystonin, transcript variant X17                                      | mRNA |
| 216.2      |        | 8        |       |                                                                       |      |
| XM_005248  | ZNF451 | 0.022186 | 26036 | zinc finger protein 451, transcript variant X4                        | mRNA |
| 994.2      |        | 4        |       |                                                                       |      |
| XM_017010  | PHIP   | 0.002135 | 55023 | pleckstrin homology domain interacting protein, transcript variant X3 | mRNA |
| 989.2      |        | 81       |       |                                                                       |      |
| NM_017934. | PHIP   | 0.000125 | 55023 | pleckstrin homology domain interacting protein                        | mRNA |
| 7          |        | 229      |       |                                                                       |      |
| XM_011536  | TTK    | 0.008158 | 7272  | TTK protein kinase, transcript variant X1                             | mRNA |
| 099.3      |        | 3        |       |                                                                       |      |
| XM_006715  | IBTK   | 0.001316 | 25998 | inhibitor of Bruton tyrosine kinase, transcript variant X1            | mRNA |

|            |         |          |        |                                                                           |      |
|------------|---------|----------|--------|---------------------------------------------------------------------------|------|
| 453.3      |         | 87       |        |                                                                           |      |
| NM_001010  | PM20D2  | 0.000510 | 135293 | peptidase M20 domain containing 2                                         | mRNA |
| 853.3      |         | 829      |        |                                                                           |      |
| NM_014611. | MDN1    | 0.028282 | 23195  | midasin AAA ATPase 1                                                      | mRNA |
| 3          |         | 8        |        |                                                                           |      |
| NM_014611. | MDN1    | 0.015633 | 23195  | midasin AAA ATPase 1                                                      | mRNA |
| 3          |         | 2        |        |                                                                           |      |
| NM_015323. | UFL1    | 7.44E-07 | 23376  | UFM1 specific ligase 1                                                    | mRNA |
| 5          |         |          |        |                                                                           |      |
| XM_011535  | ASCC3   | 1.75E-06 | 10973  | activating signal cointegrator 1 complex subunit 3, transcript variant X2 | mRNA |
| 395.3      |         |          |        |                                                                           |      |
| NM_138459. | NUS1    | 3.54E-07 | 116150 | NUS1 dehydrololichyl diphosphate synthase subunit                         | mRNA |
| 5          |         |          |        |                                                                           |      |
| NM_001291  | PTPRK   | 0.000777 | 5796   | protein tyrosine phosphatase receptor type K, transcript variant 6        | mRNA |
| 984.2      |         | 792      |        |                                                                           |      |
| NM_001350  | EPB41L2 | 0.015633 | 2037   | erythrocyte membrane protein band 4.1 like 2, transcript variant 8        | mRNA |
| 301.2      |         | 2        |        |                                                                           |      |
| NM_001350  | EPB41L2 | 0.022186 | 2037   | erythrocyte membrane protein band 4.1 like 2, transcript variant 8        | mRNA |

|                    |         |                 |        |                                                                               |              |
|--------------------|---------|-----------------|--------|-------------------------------------------------------------------------------|--------------|
| 301.2              |         | 4               |        |                                                                               |              |
| NM_006620.<br>4    | HBS1L   | 0.018591<br>3   | 10767  | HBS1 like translational GTPase, transcript variant 1                          | mRNA         |
| NM_006620.<br>4    | HBS1L   | 0.000695<br>991 | 10767  | HBS1 like translational GTPase, transcript variant 1                          | mRNA         |
| XR_0017435<br>24.1 | ARFGEF3 | 0.003393<br>83  | 57221  | ARFGEF family member 3, transcript variant X1                                 | misc_R<br>NA |
| XR_0017435<br>24.1 | ARFGEF3 | 0.000510<br>829 | 57221  | ARFGEF family member 3, transcript variant X1                                 | misc_R<br>NA |
| XR_0017435<br>24.1 | ARFGEF3 | 0.002833<br>12  | 57221  | ARFGEF family member 3, transcript variant X1                                 | misc_R<br>NA |
| XM_024446<br>536.1 | UTRN    | 0.008158<br>3   | 7402   | utrophin, transcript variant X9                                               | mRNA         |
| XM_006715<br>560.4 | UTRN    | 0.025326<br>2   | 7402   | utrophin, transcript variant X12                                              | mRNA         |
| XR_0017433<br>93.2 | NUP43   | 0.000358<br>192 | 348995 | nucleoporin 43, transcript variant X7                                         | misc_R<br>NA |
| XM_006715          | SYNE1   | 0.036449        | 23345  | spectrin repeat containing nuclear envelope protein 1, transcript variant X20 | mRNA         |

|            |       |          |       |                                                                        |      |
|------------|-------|----------|-------|------------------------------------------------------------------------|------|
| 420.2      |       | 2        |       |                                                                        |      |
| NM_001286  | SCAF8 | 0.017620 | 22828 | SR-related CTD associated factor 8, transcript variant 5               | mRNA |
| 199.2      |       | 9        |       |                                                                        |      |
| XM_005267  | SYNJ2 | 0.038533 | 8871  | synaptojanin 2, transcript variant X10                                 | mRNA |
| 200.1      |       | 3        |       |                                                                        |      |
| NM_000876. | IGF2R | 0.005079 | 3482  | insulin like growth factor 2 receptor                                  | mRNA |
| 4          |       | 4        |       |                                                                        |      |
| NM_000876. | IGF2R | 5.04E-05 | 3482  | insulin like growth factor 2 receptor                                  | mRNA |
| 4          |       |          |       |                                                                        |      |
| NM_000876. | IGF2R | 7.63E-09 | 3482  | insulin like growth factor 2 receptor                                  | mRNA |
| 4          |       |          |       |                                                                        |      |
| NM_000876. | IGF2R | 0.000400 | 3482  | insulin like growth factor 2 receptor                                  | mRNA |
| 4          |       | 24       |       |                                                                        |      |
| XM_017011  | INTS1 | 3.40E-13 | 26173 | integrator complex subunit 1, transcript variant X2                    | mRNA |
| 960.1      |       |          |       |                                                                        |      |
| NM_001080  | INTS1 | 4.85E-08 | 26173 | integrator complex subunit 1                                           | mRNA |
| 453.3      |       |          |       |                                                                        |      |
| NM_001033  | WIPI2 | 3.40E-13 | 26100 | WD repeat domain, phosphoinositide interacting 2, transcript variant 4 | mRNA |

|                    |         |                |               |                                                           |      |
|--------------------|---------|----------------|---------------|-----------------------------------------------------------|------|
| 519.2              |         |                |               |                                                           |      |
| XM_017012<br>733.1 | TNRC18  | 4.40E-06       | 84629         | trinucleotide repeat containing 18, transcript variant X5 | mRNA |
| XM_024446<br>619.1 | ZNF316  | 0.001039<br>18 | 100131<br>017 | zinc finger protein 316, transcript variant X3            | mRNA |
| XM_024446<br>619.1 | ZNF316  | 0.043385<br>8  | 100131<br>017 | zinc finger protein 316, transcript variant X3            | mRNA |
| NM_138426.<br>4    | GLCCI1  | 0.002135<br>81 | 113263        | glucocorticoid induced 1                                  | mRNA |
| NM_001362<br>794.2 | TAX1BP1 | 3.98E-05       | 8887          | Tax1 binding protein 1, transcript variant 5              | mRNA |
| NM_001166<br>118.3 | NT5C3A  | 0.031976<br>3  | 51251         | 5'-nucleotidase, cytosolic IIIA, transcript variant 4     | mRNA |
| NM_015283.<br>2    | DPY19L1 | 0.005747<br>95 | 23333         | dpy-19 like C-mannosyltransferase 1, transcript variant 2 | mRNA |
| NM_001122<br>956.2 | DBNL    | 0.043385<br>8  | 28988         | drebrin like, transcript variant 3                        | mRNA |
| NM_001363          | YKT6    | 0.016627       | 10652         | YKT6 v-SNARE homolog, transcript variant 2                | mRNA |

|                    |         |                 |        |                                                                       |      |
|--------------------|---------|-----------------|--------|-----------------------------------------------------------------------|------|
| 678.2              |         | 6               |        |                                                                       |      |
| XM_024446<br>783.1 | OGDH    | 0.048575        | 4967   | oxoglutarate dehydrogenase, transcript variant X4                     | mRNA |
| XM_011515<br>480.3 | TNS3    | 9.29E-06        | 64759  | tensin 3, transcript variant X7                                       | mRNA |
| XM_017012<br>538.1 | TNS3    | 0.000777<br>792 | 64759  | tensin 3, transcript variant X3                                       | mRNA |
| XM_011515<br>239.1 | COBL    | 0.000338<br>213 | 23242  | cordon-bleu WH2 repeat protein, transcript variant X9                 | mRNA |
| NM_201282.<br>2    | EGFR    | 0.011017<br>4   | 1956   | epidermal growth factor receptor, transcript variant 2                | mRNA |
| XM_024446<br>747.1 | ZNF680  | 0.017620<br>9   | 340252 | zinc finger protein 680, transcript variant X12                       | mRNA |
| NM_001387<br>691.1 | POM121  | 2.88E-06        | 9883   | POM121 transmembrane nucleoporin, transcript variant 10               | mRNA |
| NM_032408.<br>4    | BAZ1B   | 0.015633<br>2   | 9031   | bromodomain adjacent to zinc finger domain 1B, transcript variant 2   | mRNA |
| XM_017012          | CASTOR2 | 0.022186        | 729438 | cytosolic arginine sensor for mTORC1 subunit 2, transcript variant X1 | mRNA |

|                    |           |                 |               |                                                                              |              |
|--------------------|-----------|-----------------|---------------|------------------------------------------------------------------------------|--------------|
| 574.1              |           | 4               |               |                                                                              |              |
| NM_001350<br>120.2 | SEMA3C    | 0.011017<br>4   | 10512         | semaphorin 3C, transcript variant 1                                          | mRNA         |
| NM_001379<br>277.1 | AKAP9     | 0.023692<br>5   | 10142         | A-kinase anchoring protein 9, transcript variant 6                           | mRNA         |
| XR_927503.<br>3    | GATAD1    | 0.045986        | 57798         | GATA zinc finger domain containing 1, transcript variant X8                  | misc_R<br>NA |
| XM_005250<br>453.1 | PON2      | 1.35E-05        | 5445          | paraoxonase 2, transcript variant X1                                         | mRNA         |
| NR_147989.<br>1    | CZ1P-ASNS | 0.000987<br>21  | 107986<br>827 | CZ1P-ASNS readthrough                                                        | lnc_RN<br>A  |
| NM_003496.<br>4    | TRRAP     | 0.011017<br>4   | 8295          | transformation/transcription domain associated protein, transcript variant 2 | mRNA         |
| NM_003496.<br>4    | TRRAP     | 0.000187<br>923 | 8295          | transformation/transcription domain associated protein, transcript variant 2 | mRNA         |
| NM_001244<br>580.2 | TRRAP     | 0.019824<br>4   | 8295          | transformation/transcription domain associated protein, transcript variant 1 | mRNA         |
| XM_006715          | ARPC1B    | 0.017620        | 10095         | actin related protein 2/3 complex subunit 1B, transcript variant X2          | mRNA         |

|                    |         |                |       |                                                                       |      |
|--------------------|---------|----------------|-------|-----------------------------------------------------------------------|------|
| 826.2              |         | 9              |       |                                                                       |      |
| XM_005250<br>348.3 | MCM7    | 1.39E-08       | 4176  | minichromosome maintenance complex component 7, transcript variant X2 | mRNA |
| NM_001364<br>999.1 | TAF6    | 0.034207<br>6  | 6878  | TATA-box binding protein associated factor 6, transcript variant 8    | mRNA |
| NM_001363<br>493.2 | SLC12A9 | 0.004497<br>29 | 56996 | solute carrier family 12 member 9, transcript variant 4               | mRNA |
| NM_001128<br>853.2 | SRRT    | 0.045986       | 51593 | serrate, RNA effector molecule, transcript variant 4                  | mRNA |
| XM_011516<br>589.3 | TRIM56  | 0.013087<br>7  | 81844 | tripartite motif containing 56, transcript variant X1                 | mRNA |
| NM_001084.<br>5    | PLOD3   | 1.64E-06       | 8985  | procollagen-lysine,2-oxoglutarate 5-dioxygenase 3                     | mRNA |
| NM_005746.<br>3    | NAMPT   | 0.005079<br>4  | 10135 | nicotinamide phosphoribosyltransferase                                | mRNA |
| NM_005746.<br>3    | NAMPT   | 3.77E-05       | 10135 | nicotinamide phosphoribosyltransferase                                | mRNA |
| XM_011516          | MET     | 1.59E-05       | 4233  | MET proto-oncogene, receptor tyrosine kinase, transcript variant X1   | mRNA |

|                    |         |                 |       |                                                                        |      |
|--------------------|---------|-----------------|-------|------------------------------------------------------------------------|------|
| 223.1              |         |                 |       |                                                                        |      |
| NM_001127<br>500.3 | MET     | 2.87E-07        | 4233  | MET proto-oncogene, receptor tyrosine kinase, transcript variant 1     | mRNA |
| XM_011515<br>736.2 | FAM3C   | 2.77E-05        | 10447 | FAM3 metabolism regulating signaling molecule C, transcript variant X1 | mRNA |
| NM_001382<br>221.1 | TNPO3   | 0.000187<br>923 | 23534 | transportin 3, transcript variant 9                                    | mRNA |
| XM_011516<br>289.2 | ZC3HC1  | 0.031976<br>3   | 51530 | zinc finger C3HC-type containing 1, transcript variant X3              | mRNA |
| XM_005250<br>233.5 | KLHDC10 | 0.000425<br>096 | 23008 | kelch domain containing 10, transcript variant X1                      | mRNA |
| NM_005397.<br>4    | PODXL   | 5.68E-05        | 5420  | podocalyxin like, transcript variant 2                                 | mRNA |
| NM_015135.<br>3    | NUP205  | 0.012354        | 23165 | nucleoporin 205, transcript variant 1                                  | mRNA |
| NM_001318<br>246.2 | CREB3L2 | 0.003393<br>83  | 64764 | cAMP responsive element binding protein 3 like 2, transcript variant 3 | mRNA |
| NM_016019.         | LUC7L2  | 0.001484        | 51631 | LUC7 like 2, pre-mRNA splicing factor, transcript variant 1            | mRNA |

|                |         |            |        |                                                                     |          |
|----------------|---------|------------|--------|---------------------------------------------------------------------|----------|
| 5              |         | 02         |        |                                                                     |          |
| NR_156491.1    | SLC37A3 | 0.0026633  | 84255  | solute carrier family 37 member 3, transcript variant 12            | misc_RNA |
| NM_005232.5    | EPHA1   | 0.0081583  | 2041   | EPH receptor A1                                                     | mRNA     |
| XM_005250075.3 | TCAF1   | 0.00054628 | 9747   | TRPM8 channel associated factor 1, transcript variant X3            | mRNA     |
| NM_001371245.1 | PDIA4   | 1.11E-08   | 9601   | protein disulfide isomerase family A member 4, transcript variant 3 | mRNA     |
| NM_152411.4    | ZNF786  | 0.0364492  | 136051 | zinc finger protein 786                                             | mRNA     |
| NR_171548.1    | CHPF2   | 0.00607462 | 54480  | chondroitin polymerizing factor 2, transcript variant 7             | misc_RNA |
| XM_005250027.4 | KMT2C   | 8.96E-06   | 58508  | lysine methyltransferase 2C, transcript variant X5                  | mRNA     |
| XM_017012482.1 | KMT2C   | 0.00926878 | 58508  | lysine methyltransferase 2C, transcript variant X9                  | mRNA     |
| XM_005250      | KMT2C   | 0.022186   | 58508  | lysine methyltransferase 2C, transcript variant X5                  | mRNA     |

|                    |        |                |       |                                                                        |              |
|--------------------|--------|----------------|-------|------------------------------------------------------------------------|--------------|
| 027.4              |        | 4              |       |                                                                        |              |
| XR_927552.<br>3    | UBE3C  | 0.004766<br>76 | 9690  | ubiquitin protein ligase E3C, transcript variant X3                    | misc_R<br>NA |
| NM_001348<br>081.2 | DLC1   | 0.012354       | 10395 | DLC1 Rho GTPase activating protein, transcript variant 6               | mRNA         |
| NM_006094.<br>5    | DLC1   | 0.012354       | 10395 | DLC1 Rho GTPase activating protein, transcript variant 2               | mRNA         |
| NM_006094.<br>5    | DLC1   | 0.005747<br>95 | 10395 | DLC1 Rho GTPase activating protein, transcript variant 2               | mRNA         |
| NM_021630.<br>6    | PDLIM2 | 0.001039<br>18 | 64236 | PDZ and LIM domain 2, transcript variant 2                             | mRNA         |
| NM_001393<br>997.1 | CCAR2  | 1.64E-08       | 57805 | cell cycle and apoptosis regulator 2, transcript variant 1             | mRNA         |
| NM_001128<br>930.3 | ENTPD4 | 0.045986       | 9583  | ectonucleoside triphosphate diphosphohydrolase 4, transcript variant 2 | mRNA         |
| NM_024940.<br>8    | DOCK5  | 9.29E-06       | 80005 | dedicator of cytokinesis 5, transcript variant 1                       | mRNA         |
| NM_024940.         | DOCK5  | 0.015633       | 80005 | dedicator of cytokinesis 5, transcript variant 1                       | mRNA         |

|            |        |          |       |                                                                            |      |
|------------|--------|----------|-------|----------------------------------------------------------------------------|------|
| 8          |        | 2        |       |                                                                            |      |
| NM_024940. | DOCK5  | 0.003216 | 80005 | dedicator of cytokinesis 5, transcript variant 1                           | mRNA |
| 8          |        | 51       |       |                                                                            |      |
| NM_001197  | DPYSL2 | 0.003582 | 1808  | dihydropyrimidinase like 2, transcript variant 1                           | mRNA |
| 293.3      |        | 26       |       |                                                                            |      |
| NM_001195  | GSR    | 2.71E-08 | 2936  | glutathione-disulfide reductase, transcript variant 2                      | mRNA |
| 102.3      |        |          |       |                                                                            |      |
| NM_001362  | DDHD2  | 1.80E-05 | 23259 | DDHD domain containing 2, transcript variant 5                             | mRNA |
| 912.2      |        |          |       |                                                                            |      |
| NM_001362  | DDHD2  | 3.98E-05 | 23259 | DDHD domain containing 2, transcript variant 5                             | mRNA |
| 912.2      |        |          |       |                                                                            |      |
| NM_023034. | NSD3   | 0.003393 | 54904 | nuclear receptor binding SET domain protein 3, transcript variant long     | mRNA |
| 2          |        | 83       |       |                                                                            |      |
| NM_001352  | TACC1  | 0.002538 | 6867  | transforming acidic coiled-coil containing protein 1, transcript variant 6 | mRNA |
| 779.2      |        | 27       |       |                                                                            |      |
| NM_032237. | POMK   | 0.023692 | 84197 | protein O-mannose kinase, transcript variant 1                             | mRNA |
| 5          |        | 5        |       |                                                                            |      |
| NM_001081  | PRKDC  | 2.40E-06 | 5591  | protein kinase, DNA-activated, catalytic subunit, transcript variant 2     | mRNA |

|            |        |          |       |                                                                             |      |
|------------|--------|----------|-------|-----------------------------------------------------------------------------|------|
| 640.2      |        |          |       |                                                                             |      |
| NM_001081  | PRKDC  | 0.000777 | 5591  | protein kinase, DNA-activated, catalytic subunit, transcript variant 2      | mRNA |
| 640.2      |        | 792      |       |                                                                             |      |
| NM_001081  | PRKDC  | 5.78E-10 | 5591  | protein kinase, DNA-activated, catalytic subunit, transcript variant 2      | mRNA |
| 640.2      |        |          |       |                                                                             |      |
| NM_001081  | PRKDC  | 6.42E-08 | 5591  | protein kinase, DNA-activated, catalytic subunit, transcript variant 2      | mRNA |
| 640.2      |        |          |       |                                                                             |      |
| NM_001081  | PRKDC  | 5.67E-09 | 5591  | protein kinase, DNA-activated, catalytic subunit, transcript variant 2      | mRNA |
| 640.2      |        |          |       |                                                                             |      |
| NM_006904. | PRKDC  | 5.68E-05 | 5591  | protein kinase, DNA-activated, catalytic subunit, transcript variant 1      | mRNA |
| 7          |        |          |       |                                                                             |      |
| XM_017014  | RB1CC1 | 0.045986 | 9821  | RB1 inducible coiled-coil 1, transcript variant X7                          | mRNA |
| 108.2      |        |          |       |                                                                             |      |
| XM_011517  | LYN    | 0.000141 | 4067  | LYN proto-oncogene, Src family tyrosine kinase, transcript variant X1       | mRNA |
| 529.3      |        | 056      |       |                                                                             |      |
| NM_017813. | BPNT2  | 4.80E-10 | 54928 | 3'(2'), 5'-bisphosphate nucleotidase 2                                      | mRNA |
| 5          |        |          |       |                                                                             |      |
| NM_001144  | NSMAF  | 0.000987 | 8439  | neutral sphingomyelinase activation associated factor, transcript variant 2 | mRNA |

|                 |        |                 |       |                                                                             |          |
|-----------------|--------|-----------------|-------|-----------------------------------------------------------------------------|----------|
| 772.1           |        | 21              |       |                                                                             |          |
| NM_003580.4     | NSMAF  | 0.006074<br>62  | 8439  | neutral sphingomyelinase activation associated factor, transcript variant 1 | mRNA     |
| XM_017013.612.1 | CHD7   | 0.003216<br>51  | 55636 | chromodomain helicase DNA binding protein 7, transcript variant X3          | mRNA     |
| XM_017013.612.1 | CHD7   | 0.013087<br>7   | 55636 | chromodomain helicase DNA binding protein 7, transcript variant X3          | mRNA     |
| XM_017013.266.1 | TRAM1  | 0.006074<br>62  | 23471 | translocation associated membrane protein 1, transcript variant X1          | mRNA     |
| NR_170693.1     | TPD52  | 0.004497<br>29  | 7163  | tumor protein D52, transcript variant 16                                    | misc_RNA |
| NM_152284.4     | CHMP4C | 0.002663<br>3   | 92421 | charged multivesicular body protein 4C                                      | mRNA     |
| NM_002568.4     | PABPC1 | 1.59E-05        | 26986 | poly(A) binding protein cytoplasmic 1                                       | mRNA     |
| XM_005250.962.5 | UBR5   | 0.000618<br>347 | 51366 | ubiquitin protein ligase E3 component n-recognin 5, transcript variant X11  | mRNA     |
| XM_005250       | UBR5   | 0.038533        | 51366 | ubiquitin protein ligase E3 component n-recognin 5, transcript variant X11  | mRNA     |

|            |         |          |        |                                                                          |      |
|------------|---------|----------|--------|--------------------------------------------------------------------------|------|
| 962.5      |         | 3        |        |                                                                          |      |
| XM_011517  | UBR5    | 0.028282 | 51366  | ubiquitin protein ligase E3 component n-recogin 5, transcript variant X1 | mRNA |
| 104.3      |         | 8        |        |                                                                          |      |
| NM_006265. | RAD21   | 0.036449 | 5885   | RAD21 cohesin complex component                                          | mRNA |
| 3          |         | 2        |        |                                                                          |      |
| NM_006265. | RAD21   | 4.87E-07 | 5885   | RAD21 cohesin complex component                                          | mRNA |
| 3          |         |          |        |                                                                          |      |
| NM_014078. | MRPL13  | 0.028282 | 28998  | mitochondrial ribosomal protein L13                                      | mRNA |
| 6          |         | 8        |        |                                                                          |      |
| NM_001317  | FAM91A1 | 4.13E-06 | 157769 | family with sequence similarity 91 member A1, transcript variant 3       | mRNA |
| 918.1      |         |          |        |                                                                          |      |
| NM_001317  | FAM91A1 | 0.000178 | 157769 | family with sequence similarity 91 member A1, transcript variant 3       | mRNA |
| 918.1      |         | 792      |        |                                                                          |      |
| XM_017014  | WASHC5  | 0.000740 | 9897   | WASH complex subunit 5, transcript variant X1                            | mRNA |
| 113.2      |         | 067      |        |                                                                          |      |
| XM_017014  | WASHC5  | 5.04E-05 | 9897   | WASH complex subunit 5, transcript variant X1                            | mRNA |
| 113.2      |         |          |        |                                                                          |      |
| NM_001330  | WASHC5  | 0.010431 | 9897   | WASH complex subunit 5, transcript variant 2                             | mRNA |

|            |         |          |        |                                                                          |              |
|------------|---------|----------|--------|--------------------------------------------------------------------------|--------------|
| 609.2      |         | 9        |        |                                                                          |              |
| NM_001323  | EFR3A   | 0.030044 | 23167  | EFR3 homolog A, transcript variant 2                                     | mRNA         |
| 553.2      |         | 3        |        |                                                                          |              |
| XM_011516  | AGO2    | 0.001484 | 27161  | argonaute RISC catalytic component 2, transcript variant X1              | mRNA         |
| 968.2      |         | 02       |        |                                                                          |              |
| NM_001352  | PTK2    | 5.01E-06 | 5747   | protein tyrosine kinase 2, transcript variant 55                         | mRNA         |
| 744.2      |         |          |        |                                                                          |              |
| NM_198488. | FAM83H  | 0.045986 | 286077 | family with sequence similarity 83 member H                              | mRNA         |
| 5          |         |          |        |                                                                          |              |
| NM_015356. | SCRIB   | 3.40E-13 | 23513  | scribble planar cell polarity protein, transcript variant 2              | mRNA         |
| 5          |         |          |        |                                                                          |              |
| NM_023080. | C8orf33 | 0.006445 | 65265  | chromosome 8 open reading frame 33                                       | mRNA         |
| 3          |         | 37       |        |                                                                          |              |
| XR_929340. | ERMP1   | 3.36E-05 | 79956  | endoplasmic reticulum metallopeptidase 1, transcript variant X6          | misc_R<br>NA |
| 2          |         |          |        |                                                                          |              |
| XR_0017461 | UHRF2   | 0.040914 | 115426 | ubiquitin like with PHD and ring finger domains 2, transcript variant X7 | misc_R<br>NA |
| 80.2       |         |          |        |                                                                          |              |
| NM_001128  | PSIP1   | 0.008158 | 11168  | PC4 and SFRS1 interacting protein 1, transcript variant 3                | mRNA         |

|                    |         |                |       |                                                              |      |
|--------------------|---------|----------------|-------|--------------------------------------------------------------|------|
| 217.3              |         | 3              |       |                                                              |      |
| NM_001386<br>037.1 | DENND4C | 0.003582<br>26 | 55667 | DENN domain containing 4C                                    | mRNA |
| NM_004529.<br>4    | MLLT3   | 0.028282<br>8  | 4300  | MLLT3 super elongation complex subunit, transcript variant 1 | mRNA |
| NM_001370<br>062.2 | UBAP2   | 0.012354       | 55833 | ubiquitin associated protein 2, transcript variant 9         | mRNA |
| NM_007126.<br>5    | VCP     | 7.11E-06       | 7415  | valosin containing protein, transcript variant 1             | mRNA |
| NM_006377.<br>6    | UNC13B  | 0.028282<br>8  | 10497 | unc-13 homolog B, transcript variant 1                       | mRNA |
| NM_006377.<br>6    | UNC13B  | 0.016627<br>6  | 10497 | unc-13 homolog B, transcript variant 1                       | mRNA |
| NM_006289.<br>4    | TLN1    | 0.010431<br>9  | 7094  | talin 1                                                      | mRNA |
| NM_006289.<br>4    | TLN1    | 4.80E-10       | 7094  | talin 1                                                      | mRNA |
| NM_006289.         | TLN1    | 0.000290       | 7094  | talin 1                                                      | mRNA |

|                    |         |                 |       |                                                                             |              |
|--------------------|---------|-----------------|-------|-----------------------------------------------------------------------------|--------------|
| 4                  |         | 692             |       |                                                                             |              |
| NM_001376<br>037.1 | PIP5K1B | 0.001900<br>81  | 8395  | phosphatidylinositol-4-phosphate 5-kinase type 1 beta, transcript variant 5 | mRNA         |
| XM_011519<br>204.1 | TJP2    | 0.001106<br>25  | 9414  | tight junction protein 2, transcript variant X2                             | mRNA         |
| NM_001170<br>415.1 | TJP2    | 8.86E-07        | 9414  | tight junction protein 2, transcript variant 4                              | mRNA         |
| XR_929807.<br>2    | PCSK5   | 1.21E-06        | 5125  | proprotein convertase subtilisin/kexin type 5, transcript variant X6        | misc_R<br>NA |
| XM_006717<br>258.1 | TLE1    | 1.72E-07        | 7088  | TLE family member 1, transcriptional corepressor, transcript variant X3     | mRNA         |
| XM_017014<br>195.1 | SEMA4D  | 0.016627<br>6   | 10507 | semaphorin 4D, transcript variant X9                                        | mRNA         |
| NM_001378<br>571.1 | IARS1   | 0.000931<br>169 | 3376  | isoleucyl-tRNA synthetase 1, transcript variant 8                           | mRNA         |
| NM_001378<br>571.1 | IARS1   | 1.28E-06        | 3376  | isoleucyl-tRNA synthetase 1, transcript variant 8                           | mRNA         |
| NR_149061.         | PTCH1   | 0.048575        | 5727  | patched 1, transcript variant 10                                            | misc_R       |

|                    |         |                 |       |                                                                     |      |
|--------------------|---------|-----------------|-------|---------------------------------------------------------------------|------|
| 2                  |         |                 |       |                                                                     | NA   |
| NM_001201<br>575.2 | CTSV    | 0.000777<br>792 | 1515  | cathepsin V, transcript variant 2                                   | mRNA |
| XM_017015<br>354.1 | TRIM14  | 0.002833<br>12  | 9830  | tripartite motif containing 14, transcript variant X6               | mRNA |
| XM_017015<br>063.1 | TGFBR1  | 0.022186<br>4   | 7046  | transforming growth factor beta receptor 1, transcript variant X2   | mRNA |
| XM_017015<br>063.1 | TGFBR1  | 0.006445<br>37  | 7046  | transforming growth factor beta receptor 1, transcript variant X2   | mRNA |
| XM_017015<br>063.1 | TGFBR1  | 0.012354        | 7046  | transforming growth factor beta receptor 1, transcript variant X2   | mRNA |
| XM_017014<br>211.2 | SMC2    | 0.000931<br>169 | 10592 | structural maintenance of chromosomes 2, transcript variant X11     | mRNA |
| NM_001318<br>360.2 | ELP1    | 0.007700<br>01  | 8518  | elongator acetyltransferase complex subunit 1, transcript variant 2 | mRNA |
| XM_017014<br>572.1 | TMEM245 | 4.60E-10        | 23731 | transmembrane protein 245, transcript variant X7                    | mRNA |
| XM_017014          | TMEM245 | 3.76E-07        | 23731 | transmembrane protein 245, transcript variant X7                    | mRNA |

|           |           |          |        |                                                                     |      |
|-----------|-----------|----------|--------|---------------------------------------------------------------------|------|
| 572.1     |           |          |        |                                                                     |      |
| NM_001136 | PALM2AKAP | 0.043385 | 445815 | PALM2 and AKAP2 fusion, transcript variant 7                        | mRNA |
| 562.3     | 2         | 8        |        |                                                                     |      |
| NM_001363 | ECPAS     | 0.038533 | 23392  | Ecm29 proteasome adaptor and scaffold, transcript variant 2         | mRNA |
| 756.2     |           | 3        |        |                                                                     |      |
| NM_001363 | ECPAS     | 0.005079 | 23392  | Ecm29 proteasome adaptor and scaffold, transcript variant 2         | mRNA |
| 756.2     |           | 4        |        |                                                                     |      |
| XM_011518 | PTGR1     | 0.013925 | 22949  | prostaglandin reductase 1, transcript variant X5                    | mRNA |
| 395.3     |           | 3        |        |                                                                     |      |
| XM_005252 | UGCG      | 2.87E-07 | 7357   | UDP-glucose ceramide glucosyltransferase, transcript variant X1     | mRNA |
| 186.5     |           |          |        |                                                                     |      |
| XM_011519 | PTBP3     | 0.002538 | 9991   | polypyrimidine tract binding protein 3, transcript variant X1       | mRNA |
| 265.1     |           | 27       |        |                                                                     |      |
| NM_001353 | GSN       | 0.002016 | 2934   | gelsolin, transcript variant 17                                     | mRNA |
| 059.2     |           | 29       |        |                                                                     |      |
| XM_011518 | DAB2IP    | 3.40E-13 | 153090 | DAB2 interacting protein, transcript variant X1                     | mRNA |
| 264.3     |           |          |        |                                                                     |      |
| XM_011518 | GAPVD1    | 0.043385 | 26130  | GTPase activating protein and VPS9 domains 1, transcript variant X5 | mRNA |

|                    |        |                 |        |                                                                          |      |
|--------------------|--------|-----------------|--------|--------------------------------------------------------------------------|------|
| 506.2              |        | 8               |        |                                                                          |      |
| NM_001131<br>017.2 | CIZ1   | 0.043385<br>8   | 25792  | CDKN1A interacting zinc finger protein 1, transcript variant 3           | mRNA |
| XM_006717<br>246.1 | SPTAN1 | 0.028282<br>8   | 6709   | spectrin alpha, non-erythrocytic 1, transcript variant X2                | mRNA |
| NM_001375<br>958.1 | ZER1   | 0.002273<br>62  | 10444  | zyg-11 related cell cycle regulator, transcript variant 6                | mRNA |
| NM_015354.<br>3    | NUP188 | 0.003798<br>1   | 23511  | nucleoporin 188                                                          | mRNA |
| XM_011518<br>837.2 | PTPA   | 0.000169<br>724 | 5524   | protein phosphatase 2 phosphatase activator, transcript variant X4       | mRNA |
| NM_017873.<br>4    | ASB6   | 0.013087<br>7   | 140459 | ankyrin repeat and SOCS box containing 6, transcript variant 1           | mRNA |
| XM_005251<br>822.3 | FNBP1  | 0.000187<br>923 | 23048  | formin binding protein 1, transcript variant X11                         | mRNA |
| XM_011519<br>173.2 | FUBP3  | 0.000657<br>308 | 8939   | far upstream element binding protein 3, transcript variant X3            | mRNA |
| NM_007313.         | ABL1   | 0.022186        | 25     | ABL proto-oncogene 1, non-receptor tyrosine kinase, transcript variant b | mRNA |

|                    |         |                 |        |                                                                              |              |
|--------------------|---------|-----------------|--------|------------------------------------------------------------------------------|--------------|
| 3                  |         | 4               |        |                                                                              |              |
| NM_001384<br>823.1 | PRRC2B  | 0.002401<br>92  | 84726  | proline rich coiled-coil 2B, transcript variant 5                            | mRNA         |
| XM_017015<br>318.1 | GTF3C4  | 0.030044<br>3   | 9329   | general transcription factor IIIC subunit 4, transcript variant X1           | mRNA         |
| NM_001362<br>177.2 | TSC1    | 0.010431<br>9   | 7248   | TSC complex subunit 1, transcript variant 5                                  | mRNA         |
| XM_017015<br>109.1 | VAV2    | 0.000880<br>173 | 7410   | vav guanine nucleotide exchange factor 2, transcript variant X2              | mRNA         |
| XM_011518<br>272.1 | CAMSAP1 | 0.002016<br>29  | 157922 | calmodulin regulated spectrin associated protein 1, transcript variant X4    | mRNA         |
| XM_017014<br>302.1 | CAMSAP1 | 1.07E-06        | 157922 | calmodulin regulated spectrin associated protein 1, transcript variant X3    | mRNA         |
| XR_929881.<br>2    | SEC16A  | 3.40E-13        | 9919   | SEC16 homolog A, endoplasmic reticulum export factor, transcript variant X21 | misc_R<br>NA |
| XM_011518<br>717.2 | NOTCH1  | 0.001169<br>38  | 4851   | notch receptor 1, transcript variant X1                                      | mRNA         |
| XM_011518          | NOTCH1  | 0.019824        | 4851   | notch receptor 1, transcript variant X1                                      | mRNA         |

|                    |       |                |       |                                                                         |      |
|--------------------|-------|----------------|-------|-------------------------------------------------------------------------|------|
| 717.2              |       | 4              |       |                                                                         |      |
| NM_024718.<br>5    | RABL6 | 0.006074<br>62 | 55684 | RAB, member RAS oncogene family like 6, transcript variant 1            | mRNA |
| NM_015456.<br>5    | NELFB | 0.043385<br>8  | 25920 | negative elongation factor complex member B                             | mRNA |
| XM_017015<br>138.1 | EHMT1 | 0.043385<br>8  | 79813 | euchromatic histone lysine methyltransferase 1, transcript variant X11  | mRNA |
| NM_005647.<br>4    | TBL1X | 0.009859<br>34 | 6907  | transducin beta like 1 X-linked, transcript variant 1                   | mRNA |
| NM_005647.<br>4    | TBL1X | 0.028282<br>8  | 6907  | transducin beta like 1 X-linked, transcript variant 1                   | mRNA |
| NM_015691.<br>4    | WWC3  | 0.003393<br>83 | 55841 | WWC family member 3                                                     | mRNA |
| NM_001198<br>719.2 | RBBP7 | 0.019824<br>4  | 5931  | RB binding protein 7, chromatin remodeling factor, transcript variant 1 | mRNA |
| NM_001173<br>455.2 | PDHA1 | 0.001316<br>87 | 5160  | pyruvate dehydrogenase E1 subunit alpha 1, transcript variant 3         | mRNA |
| NM_001173          | PDHA1 | 0.011664       | 5160  | pyruvate dehydrogenase E1 subunit alpha 1, transcript variant 3         | mRNA |

|                    |        |                 |       |                                                                     |      |
|--------------------|--------|-----------------|-------|---------------------------------------------------------------------|------|
| 455.2              |        | 8               |       |                                                                     |      |
| XM_011544<br>000.3 | MED14  | 0.031976<br>3   | 9282  | mediator complex subunit 14, transcript variant X3                  | mRNA |
| XM_005272<br>675.4 | USP9X  | 0.026886<br>6   | 8239  | ubiquitin specific peptidase 9 X-linked, transcript variant X1      | mRNA |
| XM_005272<br>656.5 | KDM6A  | 0.030044<br>3   | 7403  | lysine demethylase 6A, transcript variant X5                        | mRNA |
| NM_001257<br>291.2 | SLC9A7 | 0.003393<br>83  | 84679 | solute carrier family 9 member A7, transcript variant 1             | mRNA |
| XM_011543<br>924.2 | CDK16  | 0.017620<br>9   | 5127  | cyclin dependent kinase 16, transcript variant X6                   | mRNA |
| XM_017029<br>569.1 | CDK16  | 0.000160<br>289 | 5127  | cyclin dependent kinase 16, transcript variant X3                   | mRNA |
| NM_001371<br>072.1 | USP11  | 0.010431<br>9   | 8237  | ubiquitin specific peptidase 11                                     | mRNA |
| NM_001654.<br>5    | ARAF   | 0.022186<br>4   | 369   | A-Raf proto-oncogene, serine/threonine kinase, transcript variant 1 | mRNA |
| NM_001353          | KDM5C  | 0.004497        | 8242  | lysine demethylase 5C, transcript variant 5                         | mRNA |

|            |       |          |       |                                                                                           |      |
|------------|-------|----------|-------|-------------------------------------------------------------------------------------------|------|
| 979.2      |       | 29       |       |                                                                                           |      |
| NM_001353  | KDM5C | 0.002401 | 8242  | lysine demethylase 5C, transcript variant 5                                               | mRNA |
| 979.2      |       | 92       |       |                                                                                           |      |
| NM_001281  | SMC1A | 0.013925 | 8243  | structural maintenance of chromosomes 1A, transcript variant 2                            | mRNA |
| 463.1      |       | 3        |       |                                                                                           |      |
| NM_031407. | HUWE1 | 0.000380 | 10075 | HECT, UBA and WWE domain containing E3 ubiquitin protein ligase 1                         | mRNA |
| 7          |       | 287      |       |                                                                                           |      |
| XM_011530  | HUWE1 | 0.008158 | 10075 | HECT, UBA and WWE domain containing E3 ubiquitin protein ligase 1, transcript variant X14 | mRNA |
| 747.1      |       | 3        |       |                                                                                           |      |
| XM_011530  | HUWE1 | 5.04E-05 | 10075 | HECT, UBA and WWE domain containing E3 ubiquitin protein ligase 1, transcript variant X14 | mRNA |
| 747.1      |       |          |       |                                                                                           |      |
| NM_019067. | GNL3L | 0.005747 | 54552 | G protein nucleolar 3 like, transcript variant 2                                          | mRNA |
| 6          |       | 95       |       |                                                                                           |      |
| NM_002444. | MSN   | 3.40E-13 | 4478  | moesin                                                                                    | mRNA |
| 3          |       |          |       |                                                                                           |      |
| XM_017029  | DLG3  | 0.006074 | 1741  | discs large MAGUK scaffold protein 3, transcript variant X4                               | mRNA |
| 322.2      |       | 62       |       |                                                                                           |      |
| XM_024452  | OGT   | 0.011664 | 8473  | O-linked N-acetylglucosamine (GlcNAc) transferase, transcript variant X1                  | mRNA |

|                    |         |                 |       |                                                                         |      |
|--------------------|---------|-----------------|-------|-------------------------------------------------------------------------|------|
| 467.1              |         | 8               |       |                                                                         |      |
| NM_181673.<br>3    | OGT     | 0.028282<br>8   | 8473  | O-linked N-acetylglucosamine (GlcNAc) transferase, transcript variant 2 | mRNA |
| XM_017029<br>605.1 | ATRX    | 0.043385<br>8   | 546   | ATRX chromatin remodeler, transcript variant X10                        | mRNA |
| NM_000291.<br>4    | PGK1    | 3.40E-13        | 5230  | phosphoglycerate kinase 1                                               | mRNA |
| NM_001204<br>402.2 | PRPS1   | 0.001039<br>18  | 5631  | phosphoribosyl pyrophosphate synthetase 1, transcript variant 2         | mRNA |
| XM_005262<br>109.2 | ACSL4   | 1.49E-06        | 2182  | acyl-CoA synthetase long chain family member 4, transcript variant X2   | mRNA |
| NM_001282<br>338.2 | PLS3    | 0.004766<br>76  | 5358  | plastin 3, transcript variant 5                                         | mRNA |
| NM_001560.<br>3    | IL13RA1 | 0.000307<br>575 | 3597  | interleukin 13 receptor subunit alpha 1                                 | mRNA |
| NM_001375<br>377.1 | STAG2   | 0.001786<br>4   | 10735 | stromal antigen 2, transcript variant 17                                | mRNA |
| NM_001375          | STAG2   | 0.028282        | 10735 | stromal antigen 2, transcript variant 17                                | mRNA |

|            |       |          |       |                                                                           |          |
|------------|-------|----------|-------|---------------------------------------------------------------------------|----------|
| 377.1      |       | 8        |       |                                                                           |          |
| NM_001130  | AIFM1 | 0.006864 | 9131  | apoptosis inducing factor mitochondria associated 1, transcript variant 5 | mRNA     |
| 847.4      |       | 88       |       |                                                                           |          |
| NM_001042  | STK26 | 0.013925 | 51765 | serine/threonine kinase 26, transcript variant 3                          | mRNA     |
| 452.2      |       | 3        |       |                                                                           |          |
| NM_001448. | GPC4  | 3.36E-05 | 2239  | glypican 4                                                                | mRNA     |
| 3          |       |          |       |                                                                           |          |
| NR_033699. | FMR1  | 5.68E-05 | 2332  | FMRP translational regulator 1, transcript variant ISO4                   | misc_RNA |
| 2          |       |          |       |                                                                           |          |
| NM_001301  | HMGB3 | 0.001405 | 3149  | high mobility group box 3, transcript variant 1                           | mRNA     |
| 228.2      |       | 07       |       |                                                                           |          |
| NM_000425. | L1CAM | 0.000931 | 3897  | L1 cell adhesion molecule, transcript variant 1                           | mRNA     |
| 5          |       | 169      |       |                                                                           |          |
| XM_017029  | HCFC1 | 0.007700 | 3054  | host cell factor C1, transcript variant X5                                | mRNA     |
| 471.2      |       | 01       |       |                                                                           |          |
| XM_005274  | IRAK1 | 5.89E-07 | 3654  | interleukin 1 receptor associated kinase 1, transcript variant X1         | mRNA     |
| 668.4      |       |          |       |                                                                           |          |
| NM_001363. | DKC1  | 7.11E-05 | 1736  | dyskerin pseudouridine synthase 1, transcript variant 1                   | mRNA     |

|   |  |  |  |  |  |  |
|---|--|--|--|--|--|--|
| 5 |  |  |  |  |  |  |
|---|--|--|--|--|--|--|

Table SVII. EMT-related genes from the EMT database.

|        |          |          |          |          |                  |         |               |
|--------|----------|----------|----------|----------|------------------|---------|---------------|
| VIM    | CTNND1   | HS3ST3A1 | IFITM3   | COLGALT2 | PRC1             | CCN5    | MIR30C1       |
| CDH1   | CXADR    | IFI44    | IGF1     | COMP     | PRKCA            | TRIM62  | SNHG6         |
| FN1    | DAB2     | IFIT1    | IGF1R    | CORO1A   | PRKCH            | SASH1   | MIR616        |
| ZEB1   | DPYSL3   | IGFBP2   | IL18     | CPA4     | PRKD1            | PFN2    | CCAT2         |
| CDH2   | DST      | IL4R     | INPP4B   | CSF1     | PROCR            | DAB2IP  | MIR187        |
| MMP2   | ELF3     | IRF7     | ISG15    | CTHRC1   | PRR15            | TRPS1   | HOXA11-<br>AS |
| SNAI2  | EPB41L4B | ITGAV    | ITGA2    | CXCL6    | PRR5-ARH<br>GAP8 | MET     | MIR153-1      |
| ZEB2   | EPN3     | ITGB3    | ITGA3    | CXCL8    | PRRG4            | BTRC    | MIR491        |
| SPARC  | F3       | JUN      | ITGB4    | CXCR4    | PRSS22           | EPB41L3 | GHET1         |
| SNAI1  | GADD45B  | KDF1     | ITGB5    | CYP27B1  | PTAFR            | WASF3   | MIR148A       |
| CCN2   | GRHL1    | KLK5     | JAM3     | CYP2F1   | PTGER2           | OSM     | MIR106B       |
| TWIST1 | IL1RN    | KLK8     | KCNK1    | CYP4F11  | PTGS1            | SEMA4C  | MIR655        |
| CDH11  | JAG1     | KRT16    | KIAA1191 | DAPP1    | RAB26            | TIAM1   | MIR9-1        |
| CLDN4  | KRT14    | KRT8     | KIT      | DBN1     | RAPGEF5          | EPAS1   | CPS1-IT1      |
| EPCAM  | KRT15    | LHFPL6   | KRT17    | DEPTOR   | RBMS1            | PDPN    | MIR26B        |

|          |          |         |         |         |          |         |          |
|----------|----------|---------|---------|---------|----------|---------|----------|
| SERPINE1 | LAD1     | LRRC1   | KRT7    | DHRS2   | RBMS3    | SNAI3   | MIR124-1 |
| TGFB1    | LAMA3    | LUM     | KRTCAP3 | DIO2    | RGL1     | SATB1   | MIR9-3   |
| COL3A1   | LLGL2    | MAPKAP1 | LAMA2   | DIXDC1  | RGS2     | WNT1    | MIR96    |
| ESRP1    | LTBP2    | MCAM    | LAMA5   | DMKN    | RHOB     | SOX9    | MIR489   |
| INHBA    | MAPK13   | MRAS    | LAMB1   | DNAJB4  | RLN2     | HTATIP2 | MIR379   |
| PMP22    | MARVELD2 | MSRB3   | LARP6   | DOCK10  | RNF128   | ASCL2   | HOTTIP   |
| WNT5A    | MARVELD3 | NECTIN4 | LAS1L   | DOCK9   | RNF14    | FOXF2   | MIR15A   |
| ST14     | MISP     | NEXN    | LIX1L   | DPP8    | ROR1     | PAR6A   | MIR194-1 |
| TNC      | MMP14    | NID1    | LMCD1   | DPT     | RUNX2    | SOX5    | NKILA    |
| CLDN7    | MRC2     | NID2    | LOXL1   | ECM2    | S100A9   | TRIM44  | MIR630   |
| EMP3     | MUC1     | OVOL2   | LRATD2  | EFCAB14 | SBNO1    | TRIM16  | CCAT1    |
| FSTL1    | MYL9     | P3H1    | LRP1    | EFHD2   | SCRIB    | FOXD3   | MIR143   |
| ITGA5    | MYO5B    | P3H2    | LRRC15  | EFNA1   | SEC23A   | DLX2    | MIR132   |
| LAMC2    | NT5C2    | PDGFC   | LTBP4   | EGF     | SELENBP1 | PDCD4   | MIR644A  |
| VCAN     | PMEPA1   | PERP    | LY6E    | EGR2    | SEMA3C   | NTRK2   | MIR361   |
| CDH3     | PRRX1    | PLOD2   | MACF1   | EIF4A2  | SEMA5A   | RASAL2  | MIR490   |
| COL5A2   | RGS4     | PVR     | MAF     | EPDR1   | SEPTIN6  | FZD2    | UCA1     |
| DCN      | SCNN1A   | RBM47   | MAP4K4  | ERMP1   | SERPINH1 | CIP2A   | MIR382   |

|        |         |          |        |         |         |          |               |
|--------|---------|----------|--------|---------|---------|----------|---------------|
| DSP    | SFRP1   | RFTN1    | MARK3  | ESR1    | SFRP2   | ID1      | PVT1          |
| ERBB3  | SH2D3A  | RHOD     | MBNL1  | ETS2    | SHROOM3 | BMP4     | MIR23A        |
| POSTN  | SH3YL1  | S100A4   | MGP    | FAAH2   | SKIL    | FOXA1    | MIR485        |
| RAB25  | SRPX    | SAA1     | MMP10  | FAM110C | SLC16A5 | GKN1     | MIR31         |
| SPINT2 | TGFB1I1 | SDC1     | MMP7   | FAM83A  | SLC22A4 | HCFC1R1  | MIR125B2      |
| TGM2   | TGFB2   | SERPINB5 | MPP7   | FAT4    | SLC37A2 | USP22    | AFAP1-A<br>S1 |
| CDS1   | THY1    | SFRP4    | MYLK   | FBN2    | SLC3A2  | EFEMP1   | MIR598        |
| COL1A1 | TMPRSS4 | SHC1     | MYO6   | FGF5    | SLC7A5  | DYRK2    | MIR876        |
| ESRP2  | ABLIM1  | SLC2A3   | MYO9A  | FILIP1L | SMC5    | PITPNM3  | MIR181B1      |
| GRHL2  | ACTA2   | SLC6A8   | NAP1L3 | FLNB    | SNCA    | ONECUT2  | MIR30C2       |
| HTRA1  | ADAM12  | SLIT2    | NDRG1  | FUCA1   | SNTB1   | TRIM66   | MIR1236       |
| MAP7   | AGR2    | SLIT3    | NNMT   | FUT1    | SOX10   | SUZ12    | MIR612        |
| MMP9   | AKT3    | SMAD3    | NPHP3  | FUT3    | SOX2    | SATB2    | MIR139        |
| OCLN   | ANGPTL2 | SMPDL3B  | NRG1   | FYN     | SPINK5  | CCL21    | MIR22         |
| PDGFRB | ANK3    | SPRR1B   | NRP2   | GALE    | ST3GAL2 | JARID2   | MIR520C       |
| PRSS8  | ARHGAP8 | STAT1    | OSBPL3 | GALNT2  | STAT5A  | TP53INP1 | MIR495        |
| AP1M2  | BSPRY   | SULF1    | PAK6   | GGCT    | STEAP1  | BCL9     | MIR29B1       |

|         |         |               |        |        |         |             |              |
|---------|---------|---------------|--------|--------|---------|-------------|--------------|
| AP1S2   | CA2     | SYDE1         | PARD6B | GLDC   | STEAP4  | GFER        | SNHG15       |
| AXL     | CAVIN1  | SYK           | PATJ   | GLI3   | STRA6   | RHOC        | HOXA-AS<br>2 |
| CD44    | CCN1    | TACSTD2       | PEA15  | GLIPR2 | STX19   | NODAL       | ZEB1-AS1     |
| COL1A2  | CHN1    | TFPI          | PIK3CD | GLS2   | STX3    | FHOD1       | CBR3-AS<br>1 |
| COL5A1  | CKMT1B  | TGFB3         | PLAU   | GLYR1  | STXBP5  | GOLM1       | MIR195       |
| FBN1    | CLDN1   | THBS2         | PROM2  | GNAL   | SUSD5   | NANOGP<br>8 | MIR27B       |
| FGFBP1  | CLDN11  | TIMP2         | PRR16  | GPC1   | SYNE1   | HIPK2       | NORAD        |
| FGFR1   | COL7A1  | TIMP3         | PTGIS  | GSDME  | SYT11   | TFAP4       | BCAR4        |
| FOXC2   | CXCL12  | TJP3          | PTK2   | GSE1   | SYTL1   | SENP1       | CYTOR        |
| IRF6    | DDR1    | TMEM125       | PTPN3  | GSK3B  | TBC1D23 | RCOR1       | MIR214       |
| KRT5    | DLC1    | TMEM158       | PXDC1  | HACL1  | TC2N    | CD274       | MIR340       |
| PCOLCE  | ELMO3   | TMPRSS11<br>E | RAB31  | HBEGF  | TGFBR1  | FLOT2       | MIR661       |
| S100A14 | EML1    | TPD52         | RAB6A  | HEY1   | THBD    | CCN6        | MIR9-2       |
| CLDN3   | EPB41L5 | TPM2          | RASEF  | HMBS   | TMEM126 | CUX1        | MIR26A1      |

|        |        |         |          |          |               |               |                  |
|--------|--------|---------|----------|----------|---------------|---------------|------------------|
|        |        |         |          |          | B             |               |                  |
| COL6A1 | EPHA1  | TRIM29  | RFLNB    | HPS5     | TMEM167<br>A  | TBX1          | MIR16-2          |
| COL6A2 | FA2H   | VEGFA   | SACS     | HS3ST1   | TMEM37        | NES           | MIR100           |
| FXVD3  | FHL1   | WIPF1   | SAT1     | HS3ST3B1 | TMEM47        | MIR23B        | LINC0026<br>1    |
| GNG11  | ID2    | WWC1    | SCEL     | HSPG2    | TMPRSS13      | MIR29C        | LINC0118<br>6    |
| GREM1  | IFIT3  | ZCCHC24 | SCG2     | IER3     | TNFAIP3       | MIR203A       | LINC0223<br>1    |
| IGFBP7 | IGFBP5 | ZFPM2   | SDC4     | IFIT2    | TNFRSF11<br>B | MIR155        | LINC0259<br>9    |
| ITGB1  | ITGA6  | ABCA12  | SERPINB2 | IGF2     | TOB1          | MIR370        | BX111            |
| KRT19  | ITGB6  | ABI1    | SHMT1    | IKBIP    | TSPAN13       | LINC0031<br>2 | TBILA            |
| LOX    | JAG2   | ACAA1   | SMAD2    | IL11     | TSPAN4        | ASAP1-IT<br>1 | SLC25A25<br>-AS1 |
| LOXL2  | KLK10  | ACTN1   | SMAD7    | IL13RA2  | TUBA4A        | DUBR          | LOC11116<br>2621 |

|          |        |         |         |          |        |               |               |
|----------|--------|---------|---------|----------|--------|---------------|---------------|
| PDGFRA   | LAMB3  | ADAM23  | SPHK1   | IL1B     | TUFT1  | MSC-AS1       | TP73-AS1      |
| PTX3     | LCN2   | ADAMTS1 | SPP1    | IL1R1    | TUT7   | MIR193B<br>HG | MIR93         |
| SERPINE2 | LEF1   | ADORA2B | SPRR1A  | IL32     | ULBP2  | FAM225B       | MIR153-2      |
| SLPI     | MLPH   | ALDH1A3 | SPRY1   | ILDR1    | VAV3   | LINC0031<br>3 | MIR448        |
| SPOCK1   | MME    | ALDH3A2 | STEAP3  | ILK      | VPS13A | FAM225A       | MIR338        |
| TCF4     | MYH14  | ALOX5AP | SYNE2   | INAVA    | VSNL1  | SNHG18        | HULC          |
| TMEM30B  | NOTCH1 | ANGPTL4 | TCF3    | INHBB    | WFDC2  | LINC0208<br>5 | MIR1290       |
| TPM1     | NREP   | ANKRD22 | TGFBR2  | IQCB1    | WNK1   | MIR31HG       | PANDAR        |
| TSPAN1   | NT5E   | ANTXR1  | TGFBR3  | ITGA11   | WNT11  | AGAP2-A<br>S1 | MIR135B       |
| BMP1     | PALLD  | ANXA9   | TIA1    | KCNMA1   | XDH    | SNHG12        | MIR10A        |
| C1ORF116 | PKP2   | APLP2   | TJP2    | KDELR3   | XYLT1  | MIR9-3H<br>G  | LET-7A-5<br>P |
| CALD1    | PLEK2  | AQP3    | TMEM45B | KIAA0040 | YAP1   | LINC0023<br>9 | MIR1          |

|        |          |          |           |        |         |               |               |
|--------|----------|----------|-----------|--------|---------|---------------|---------------|
| CMTM3  | PLPP3    | AREG     | TNFRSF12A | KLC3   | ZBTB38  | FAM201A       | MIR103A-3P    |
| COL4A1 | PLS1     | ATP2C2   | TOX3      | KLF10  | ZNF207  | UNC5B-A<br>S1 | MIR122-5<br>P |
| CXCL1  | PPL      | ATP8B1   | TP53I3    | KLK6   | ZNF788P | PXN-AS1       | MIR124-3<br>P |
| CYP1B1 | PRR15L   | B3GNT3   | TP63      | KLK7   | CTNNB1  | IGF2-AS       | MIR128A       |
| DDR2   | PTHLH    | BDNF     | TPD52L1   | KRT6B  | BMI1    | MIR141        | MIR128-2      |
| DSC2   | PXN      | BGN      | TPM4      | LAMA4  | STAT3   | MIR200A       | MIR129        |
| EHF    | QSOX1    | BIN1     | TTC28     | LBH    | GLI1    | MIR200B       | MIR133A       |
| GLIPR1 | RECK     | BPGM     | TTC39A    | LCP1   | HIF1A   | MIR200C       | MIR140-3<br>P |
| HOOK1  | SDC2     | C1ORF210 | TWIST2    | LIPG   | FOXQ1   | MIR429        | MIR142-3<br>P |
| IGFBP4 | SERPINB1 | CALB2    | UAP1      | LRATD1 | FOXM1   | MIR542        | MIR16-5P      |
| JUP    | STAP2    | CAP2     | UPP1      | MAFB   | MTDH    | MIR30B        | MIR181A       |
| KRT18  | STC1     | CASK     | VCAM1     | MANSC1 | TBXT    | MIR30D        | MIR181C       |
| LGALS1 | TBX3     | CBLC     | ZNF165    | MAP3K7 | SOX4    | MIR30E        | MIR181D       |

|        |        |         |         |         |        |                |               |
|--------|--------|---------|---------|---------|--------|----------------|---------------|
| MAL2   | TFPI2  | CCND2   | ABCA1   | MATN2   | SIX1   | MIR130B        | MIR18A        |
| MPZL2  | TIMP1  | CD46    | ABCB8   | MATN3   | NANOG  | MIR192         | MIR18B        |
| MST1R  | TJP1   | CD68    | ABCC4   | MCM7    | FAM3C  | MIR193B        | MIR197        |
| NR2F1  | TMC4   | CDH12   | ACTA1   | MEST    | KLF17  | MIR215         | MIR199A       |
| NRP1   | TMC5   | CDH13   | ADIRF   | METTL7A | DCLK1  | MIR17          | MIR19B-3<br>P |
| PKP3   | UCHL1  | CDKN2C  | AHNAK   | MFAP5   | TM4SF5 | LINC0269<br>3  | MIR210        |
| S100A8 | VEGFC  | CEACAM6 | AK5     | MITF    | KLF8   | C5ORF66        | MIR222        |
| SEC31A | WNT5B  | CHST11  | AKT1    | MMP12   | WWTR1  | MIR22HG        | MIR223        |
| SPINT1 | ADAM15 | COA1    | ALDH1A1 | MMP13   | PDGFD  | MEG3           | MIR224        |
| TAGLN  | ADAM19 | COL12A1 | ANKHD1  | MPRIIP  | TDGF1  | SCAMP1-<br>AS1 | MIR24-1       |
| THBS1  | ADGRF1 | COL13A1 | ANKLE2  | MSN     | EZH2   | ASH1L-A<br>S1  | MIR27A        |
| CCL2   | ADGRG1 | COL16A1 | ANKRD1  | MUC20   | CCR7   | LOC73010<br>1  | MIR296-5<br>P |
| CD24   | AKAP12 | COL17A1 | ANO1    | MXRA5   | SMAD4  | MIR600H        | MIR301        |

|        |          |         |          |         |          |                |                |
|--------|----------|---------|----------|---------|----------|----------------|----------------|
|        |          |         |          |         |          | G              |                |
| COL6A3 | AKAP13   | COL8A1  | ANPEP    | NAV1    | KDM1A    | NEAT1          | MIR30C-5<br>P  |
| CYBRD1 | ALPK2    | CRLF1   | ANXA3    | NDN     | KLF4     | PAXIP1-A<br>S1 | MIR324-3<br>P  |
| ECM1   | AOX1     | DENND2D | ANXA6    | NECTIN3 | SLC39A6  | MALAT1         | MIR328-3<br>P  |
| EGFR   | ARHGAP17 | DSE     | ANXA8    | NEGR1   | PTEN     | MIR205         | MIR335-5<br>P  |
| F11R   | BICC1    | EDIL3   | ARFGAP1  | NFATC1  | CTNNBIP1 | MIR30A         | MIR33A         |
| FAP    | BIK      | EDN1    | ARHGEF40 | NQO1    | EIF5A2   | MIR145         | MIR34B         |
| FBLN1  | BMP7     | EFEMP2  | ARMCX1   | NRIP3   | BTBD7    | SPRY4-IT<br>1  | MIR34C         |
| FBLN5  | BNC2     | ELF5    | ARTN     | NUAK1   | YBX1     | MIR21          | MIR374A-<br>5P |
| FERMT2 | C1S      | ELK3    | B2M      | OGDH    | CCL18    | MIR300         | MIR486-3<br>P  |
| FGF2   | CD59     | ENAH    | B4GALT4  | OLFML3  | CTBP2    | LINC-RO<br>R   | MIR488         |

|         |        |         |        |          |       |          |                |
|---------|--------|---------|--------|----------|-------|----------|----------------|
| GALNT3  | CELSR2 | ENPP2   | BCL2A1 | OVOL1    | CTBP1 | HOTAIR   | MIR513         |
| GAS1    | CFH    | EPHB2   | BCL3   | P4HA2    | MACC1 | MIR34A   | MIR518F        |
| GFPT2   | CGN    | EPS8L1  | BICDL2 | P4HA3    | L1CAM | TUG1     | MIR628-5<br>P  |
| HAS2    | CKMT1A | EPS8L2  | BIRC3  | PAFAH1B1 | PROM1 | MIR204   | MIR636         |
| HMGA2 X | CTSZ   | ERBB2   | BLNK   | PAG1     | CUL4A | MIR221   | MIR769-5<br>P  |
| IGFBP3  | DACT1  | EVPL    | BMERB1 | PAM      | PARD3 | MIR101-1 | MIR92A-3<br>P  |
| LSR     | DKK1   | FBLN2   | BMP2   | PAPSS2   | NEDD9 | MIR182   | MIR95          |
| LTBP1   | DKK3   | FGFR3   | CALU   | PDGFA    | SALL4 | MIR186   | MIR98          |
| MAP1B   | DSG2   | FMNL2   | CAPG   | PDLIM7   | SIRT1 | MIR137   | MIR99A         |
| MFF     | EPPK1  | FOXA2   | CAV1   | PHGDH    | HDGF  | ZEB2-AS1 | MIR291A-<br>5P |
| MMP1    | EVI2A  | FOXC1   | CAVIN2 | PI3      | PAQR3 | MIR373   | MIR3092-<br>3P |
| MMP3    | EXPH5  | GADD45A | CBR3   | PKP1     | TET1  | H19      | MIR3104-<br>3P |

|         |        |         |         |          |           |          |            |
|---------|--------|---------|---------|----------|-----------|----------|------------|
| MYO5C   | FGFR2  | GALNT10 | CCDC50  | PLA2G7   | SHH       | ZFAS1    | MIR422B    |
| PLAT    | FLNA   | GJA1    | CCND1   | PLAAT4   | PEBP1     | MIR506   | MIR5046    |
| PLAUR   | FLRT2  | GNB4    | CD9     | PLAGL1   | POU5F1    | MIR1271  | MIR669H-3P |
| S100P   | FST    | GOLGA2  | CD99L2  | PLEKHO1  | SCUBE3    | MIR15B   | MIR674-5P  |
| SRGN    | FSTL3  | GPC6    | CDH6    | PLPP2    | FOSL1     | MIR375   |            |
| TGFBI   | FZD7   | GRTP1   | CDK14   | PNMA2    | PCBP1     | MIR150   |            |
| TNFAIP6 | GEM    | HEG1    | CDKN1A  | POPDC3   | MRTFA     | MIR211   |            |
| TUBA1A  | GJB3   | HMOX1   | CEACAM1 | PPARG    | TNFAIP8L2 | MIR10B   |            |
| ACKR3   | GOLT1A | HRH1    | CEACAM5 | PPFIBP2  | MAPK7     | MIR134   |            |
| COL4A2  | GRB7   | ID4     | CNKSR1  | PPIB     | FBXW7     | MIR138-1 |            |
| CRB3    | GSC    | IFI30   | COBL    | PPP1R14C | MTA1      | ,IR183   |            |

EMT, epithelial-mesenchymal transition.

Table SVIII. Epithelial-mesenchymal transition-associated genes potentially bound to DAZAP1.

|          |        |        |         |        |        |       |         |
|----------|--------|--------|---------|--------|--------|-------|---------|
| ITGA5    | MACF1  | TC2N   | MET     | OGDH   | BCL9   | DSG2  | JAG1    |
| DSC2     | LAMB3  | KDM1A  | ITGB1   | ITGAV  | STAT3  | ITGA2 | LAMA3   |
| ITGA2    | LAMA3  | STAT1  | GALNT10 | EPHA1  | SEC23A | TPD52 | L1CAM   |
| FAM3C    | HMOX1  | SLC7A5 | EGFR    | DAB2IP | ERBB3  | ERBB2 | SDC1    |
| SUZ12    | LAMC2  | CTNND1 | CUL4A   | AKT1   | PDGFRA | SCRIB | DDR1    |
| MAP4K4   | WNK1   | FMNL2  | NOTCH1  | ITGB5  | SEMA3C | SYNE2 | MSN     |
| ITGA3    | PTK2   | LLGL2  | ERMP1   | TJP3   | PPL    | GRHL1 | PLS1    |
| TMPRSS13 | TGFBR1 | LAMA5  | GSK3B   | HEG1   | SEC31A | BIN1  | DOCK9   |
| MYH14    | LRP1   | OCLN   | SH3YL1  | MMP14  | MCM7   | APLP2 | SYNE1   |
| ST14     | COBL   | BTBD7  | USP22   | DLC1   | TJP2   | NES   | BMI1    |
| CGN      | COL6A1 | MPRIP  | ACTN1   | SBNO1  | HSPG2  | EVPL  | ARFGAP1 |

Table SIX. Kyoto Encyclopedia of Genes and Genomes enrichment analysis from Web-based Gene Set Analysis Toolkit database.

| Gene set | Pathway                        | Genes                                                                                          | Enrichment ratio | P-value                |
|----------|--------------------------------|------------------------------------------------------------------------------------------------|------------------|------------------------|
| hsa04510 | Focal adhesion                 | ITGA5, MET, LAMB3, ITGB1, ITGAV, ITGA2, LAMA3, EGFR, ERBB2, LAMC2, AKT1, PDGFRA, ITGB5         | 13.57114142      | 2.85x10 <sup>-12</sup> |
| hsa05205 | Proteoglycans in cancer        | ITGA5, MET, ITGB1, ITGAV, STAT3, ITGA2, EGFR, ERBB3, ERBB2, SDC1, AKT1, ITGB5                  | 12.59047619      | 5.75x10 <sup>-11</sup> |
| hsa04512 | ECM-receptor interaction       | ITGA5, LAMB3, ITGB1, ITGAV, ITGA2, LAMA3, SDC1, LAMC2, ITGB5                                   | 22.8010453       | 1.05x10 <sup>-10</sup> |
| hsa05165 | Human papillomavirus infection | ITGA5, JAG1, LAMB3, ITGB1, ITGAV, ITGA2, LAMA3, STAT1, EGFR, LAMC2, AKT1, SCRIB, NOTCH1, ITGB5 | 8.579351032      | 1.68x10 <sup>-10</sup> |

|          |                                                        |                                                                                                                             |             |                        |
|----------|--------------------------------------------------------|-----------------------------------------------------------------------------------------------------------------------------|-------------|------------------------|
| hsa04151 | PI3K-Akt signaling pathway                             | ITGA5, MET, LAMB3, ITGB1, ITGAV, ITGA2, LAMA3, EGFR, ERBB3, ERBB2, LAMC2, AKT1, PDGFRA, ITGB5                               | 8.215819209 | 2.98×10 <sup>-10</sup> |
| hsa05200 | <u>Pathways in cancer</u>                              | MET, <u>JAG1</u> , <u>NOTCH1</u> , LAMB3, ITGB1, ITGAV, STAT3, ITGA2, LAMA3, STAT1, HMOX1, EGFR, ERBB2, LAMC2, AKT1, PDGFRA | 6.343293348 | 4.76×10 <sup>-10</sup> |
| hsa05206 | MicroRNAs in cancer                                    | ITGA5, MET, STAT3, HMOX1, EGFR, ERBB3, ERBB2, PDGFRA, NOTCH1                                                                | 12.46457143 | 2.38x10 <sup>-8</sup>  |
| hsa05412 | Arrhythmogenic right ventricular cardiomyopathy (ARVC) | ITGA5, DSG2, DSC2, ITGB1, ITGAV, ITGA2, ITGB5                                                                               | 20.19722222 | 3.74x10 <sup>-8</sup>  |
| hsa01521 | EGFR tyrosine kinase inhibitor resistance              | MET, STAT3, EGFR, ERBB3, ERBB2, AKT1, PDGFRA                                                                                | 18.40759494 | 7.19x10 <sup>-8</sup>  |

|          |                        |                                                   |             |                       |
|----------|------------------------|---------------------------------------------------|-------------|-----------------------|
| hsa05222 | Small cell lung cancer | LAMB3, ITGB1, ITGAV, ITGA2,<br>LAMA3, LAMC2, AKT1 | 15.80652174 | $2.08 \times 10^{-7}$ |
|----------|------------------------|---------------------------------------------------|-------------|-----------------------|

Table SX. Transcription factors that may regulate the abnormal expression of deleted in azoospermia-associated protein 1.

| Transcription factor | Database source | Binding start site | Binding termination site | P-value               | Matched sequence, 5' → 3' |
|----------------------|-----------------|--------------------|--------------------------|-----------------------|---------------------------|
| AHCTF1               | CISBP           | 948                | 955                      | 3.23x10 <sup>-5</sup> | AAATAAAT                  |
| AHR                  | HOCOMOC<br>O    | 1,713              | 1,721                    | 3.54x10 <sup>-5</sup> | CTTGCGTGC                 |
| AR                   | hTFtarget       | 313                | 330                      | 9.95x10 <sup>-6</sup> | TGTTTTGTACTATTTGTC        |
| ARID3A               | CISBP           | 1,416              | 1,424                    | 4.47x10 <sup>-5</sup> | AAATCAAAA                 |
| ARNT                 | TRANSFAC<br>C   | 1,532              | 1,551                    | 1.53x10 <sup>-6</sup> | GGACGCTCACGTGCCGTTCC      |
| ARNT2                | hTFtarget       | 1,537              | 1,546                    | 1.43x10 <sup>-5</sup> | GGCACGTGAG                |
| ARNTL                | hTFtarget       | 1,741              | 1,751                    | 2.74x10 <sup>-6</sup> | GCCACGTGCGT               |
| ASCL1                | hTFtarget       | 485                | 497                      | 5.92x10 <sup>-5</sup> | AGGCGCCTGCCAC             |
| ASCL2                | hTFtarget       | 1,147              | 1,156                    | 3.36x10 <sup>-5</sup> | ACACGACGAC                |
| ATF3                 | HOCOMOC<br>O    | 1,463              | 1,471                    | 3.31x10 <sup>-6</sup> | CTGAGTCAC                 |
| ATF4                 | hTFtarget       | 244                | 257                      | 6.92x10 <sup>-5</sup> | CAATGATGCAGTCA            |

|        |              |       |       |                         |                    |
|--------|--------------|-------|-------|-------------------------|--------------------|
| ATF6   | hTFtarget    | 920   | 931   | 3.50x10 <sup>-6</sup>   | GGTGAGGTGGCG       |
| ATF6B  | CISBP        | 920   | 931   | 2.68x10 <sup>-7</sup>   | GGTGAGGTGGCG       |
| ATOH1  | HOCOMOC<br>O | 1,318 | 1,326 | 7.46x10 <sup>-5</sup>   | AACAGATGC          |
| BACH1  | hTFtarget    | 1,462 | 1,474 | 2.59x10 <sup>-6</sup>   | AGTGA CTCAGCCT     |
| BACH2  | HOCOMOC<br>O | 1,463 | 1,473 | 1.49x10 <sup>-6</sup>   | GGCTGAGTCAC        |
| BARHL1 | TRANSFA<br>C | 1,408 | 1,417 | 7.12x10 <sup>-5</sup>   | GTTAATTGTT         |
| BARHL2 | CISBP        | 1,311 | 1,320 | 3.18 x 10 <sup>-5</sup> | GTTAATTGCA         |
| BARX1  | HOCOMOC<br>O | 1,408 | 1,419 | 2.25 x 10 <sup>-7</sup> | GTTAATTGTTTT       |
| BARX2  | hTFtarget    | 1,409 | 1,420 | 1.22 x 10 <sup>-5</sup> | CAAACAATTAA        |
| BATF   | hTFtarget    | 287   | 304   | 2.33 x 10 <sup>-5</sup> | TCTTTTATTTTGAGACAG |
| BATF3  | CISBP        | 921   | 931   | 1.07 x 10 <sup>-5</sup> | GGTGAGGTGGC        |
| BBX    | TRANSFA<br>C | 1,392 | 1,406 | 3.05 x 10 <sup>-5</sup> | AAATTCAATGACTAT    |
| BCL11A | hTFtarget    | 1,640 | 1,656 | 1.37 x 10 <sup>-6</sup> | TAAAGAGGAAGCGGCAG  |

|         |              |       |       |                       |                                    |
|---------|--------------|-------|-------|-----------------------|------------------------------------|
| BCL11B  | CISBP        | 142   | 150   | $3.82 \times 10^{-5}$ | ATCCGGCCA                          |
| BCL6    | CISBP        | 187   | 216   | $9.77 \times 10^{-6}$ | ACTCCAGCTATCCTCCCTCCTCAGC<br>CTCCC |
| BCL6B   | CISBP        | 646   | 657   | $7.87 \times 10^{-5}$ | TTTTTTCTAAGA                       |
| BHLHE40 | hTFtarget    | 1,537 | 1,546 | $1.23 \times 10^{-6}$ | GGCACGTGAG                         |
| BHLHE41 | hTFtarget    | 1,537 | 1,546 | $3.46 \times 10^{-6}$ | CTCACGTGCC                         |
| BLIMP-1 | TRANSFA<br>C | 1,507 | 1,522 | $4.32 \times 10^{-5}$ | CGGACAGGGGAAGGAG                   |
| BNC2    | JASPAR       | 1,462 | 1,473 | $2.57 \times 10^{-5}$ | GGCTGAGTCACT                       |
| BSX     | TRANSFA<br>C | 1,404 | 1,419 | $3.50 \times 10^{-5}$ | AAAACAATTAATAAA                    |
| CEBPA   | HOCOMOC<br>O | 265   | 275   | $3.53 \times 10^{-5}$ | GCTTGGGCAAC                        |
| CEBPB   | hTFtarget    | 536   | 546   | $4.31 \times 10^{-5}$ | GGTTTCACCAT                        |
| CEBPD   | hTFtarget    | 265   | 275   | $4.69 \times 10^{-5}$ | GTTGCCCAAGC                        |
| CEBPE   | hTFtarget    | 265   | 276   | $9.81 \times 10^{-5}$ | GCTTGGGCAACA                       |
| CEBPG   | hTFtarget    | 243   | 257   | $2.65 \times 10^{-5}$ | CAATGATGCAGTCAT                    |
| CIC     | CISBP        | 1,107 | 1,116 | $2.16 \times 10^{-5}$ | TCTGCTGACA                         |

|         |              |       |       |                         |                      |
|---------|--------------|-------|-------|-------------------------|----------------------|
| CLOCK   | hTFtarget    | 1,742 | 1,751 | 1.62 x 10 <sup>-6</sup> | GCCACGTGCG           |
| CPEB1   | CISBP        | 296   | 303   | 5.88 x 10 <sup>-5</sup> | AATAAAAG             |
| CREB3   | CISBP        | 920   | 931   | 1.33 x 10 <sup>-6</sup> | CGCCACCTCACC         |
| CREB3L1 | CISBP        | 920   | 931   | 1.87 x 10 <sup>-6</sup> | CGCCACCTCACC         |
| CREB3L2 | TRANSFA<br>C | 920   | 932   | 2.64 x 10 <sup>-5</sup> | CGCCACCTCACCC        |
| CREB3L4 | CISBP        | 920   | 931   | 5.22 x 10 <sup>-7</sup> | CGCCACCTCACC         |
| CRX     | hTFtarget    | 905   | 912   | 8.30 x 10 <sup>-5</sup> | ATAATCCC             |
| CTCF    | hTFtarget    | 2,324 | 2,343 | 4.23 x 10 <sup>-7</sup> | CGAGTCCGCCCCCGGCCGGC |
| CTCFL   | HOCOMOC<br>O | 2,324 | 2,341 | 5.72 x 10 <sup>-7</sup> | GCCGGCCGGGGGCGGACT   |
| CUX1    | hTFtarget    | 980   | 997   | 4.45 x 10 <sup>-5</sup> | AACGATCAGGCTGTCAAT   |
| CUX2    | CISBP        | 968   | 985   | 3.90 x 10 <sup>-5</sup> | ATGAATAAACCAAACGAT   |
| DBX2    | CISBP        | 1,312 | 1,318 | 7.93 x 10 <sup>-5</sup> | TAATTGC              |
| DLX2    | JASPAR       | 1,310 | 1,321 | 1.75 x 10 <sup>-5</sup> | ATGCAATTAACA         |
| DLX3    | hTFtarget    | 1,312 | 1,319 | 6.53 x 10 <sup>-5</sup> | TTAATTGC             |
| DLX4    | CISBP        | 1,312 | 1,319 | 6.14 x 10 <sup>-5</sup> | TTAATTGC             |
| DLX5    | JASPAR       | 1,310 | 1,321 | 1.62 x 10 <sup>-5</sup> | ATGCAATTAACA         |

|        |              |       |       |                       |                      |
|--------|--------------|-------|-------|-----------------------|----------------------|
| DMBX1  | CISBP        | 118   | 1,25  | $5.87 \times 10^{-5}$ | GTAATCCC             |
| DMRTC2 | CISBP        | 1,127 | 1,136 | $1.54 \times 10^{-5}$ | GGTATCATTC           |
| E2F1   | hTFtarget    | 1,950 | 1,964 | $8.63 \times 10^{-8}$ | CGGGAGCGCGCCCGG      |
| E2F2   | hTFtarget    | 1,729 | 1,739 | $4.92 \times 10^{-7}$ | CGTGCGCGCGC          |
| E2F3   | HOCOMOC<br>O | 2,134 | 2,143 | $9.24 \times 10^{-6}$ | AGGCGGGAGC           |
| E2F4   | HOCOMOC<br>O | 1,777 | 1,790 | $1.51 \times 10^{-6}$ | CAGGGGCGGGGCCA       |
| E2F5   | HOCOMOC<br>O | 1,880 | 1,889 | $9.03 \times 10^{-6}$ | GGCGCGAAAT           |
| E2F6   | hTFtarget    | 2,132 | 2,144 | $3.65 \times 10^{-6}$ | GGAGGCGGGAGCG        |
| E2F7   | HOCOMOC<br>O | 1,545 | 1,557 | $2.59 \times 10^{-6}$ | GGAGCGGGAACGG        |
| EBF1   | HOCOMOC<br>O | 2,295 | 2,307 | $7.18 \times 10^{-6}$ | GGCCCCGGGGGGC        |
| EBF2   | JASPAR       | 1,267 | 1,279 | $5.82 \times 10^{-5}$ | TCCCCTAGGGGGC        |
| EBF3   | JASPAR       | 1,267 | 1,279 | $3.99 \times 10^{-5}$ | TCCCCTAGGGGGC        |
| EBF4   | TRANSFA      | 1,233 | 1,252 | $7.89 \times 10^{-6}$ | AACCAAAACCGTGTTTTCAG |

|      |              |       |       |                       |                      |
|------|--------------|-------|-------|-----------------------|----------------------|
|      | C            |       |       |                       |                      |
| EGR1 | hTFtarget    | 1,921 | 1,940 | $2.41 \times 10^{-7}$ | CCCCTGGACCCGCCCCCGGA |
| EGR2 | hTFtarget    | 2,413 | 2,421 | $1.50 \times 10^{-6}$ | CGCCCCCGC            |
| EGR3 | hTFtarget    | 2,413 | 2,421 | $1.50 \times 10^{-6}$ | CGCCCCCGC            |
| EGR4 | hTFtarget    | 1,708 | 1,720 | $8.17 \times 10^{-6}$ | CACGCGCACGCAA        |
| EHF  | HOCOMOC<br>O | 1,640 | 1,654 | $9.41 \times 10^{-6}$ | TAAAGAGGAAGCGGC      |
| ELF1 | hTFtarget    | 719   | 732   | $4.09 \times 10^{-6}$ | AGGCAGGAAGTAGA       |
| ELF2 | hTFtarget    | 1,641 | 1,653 | $1.26 \times 10^{-5}$ | AAAGAGGAAGCGG        |
| ELF3 | hTFtarget    | 718   | 731   | $2.21 \times 10^{-6}$ | CTCTACTTCCTGCC       |
| ELF4 | hTFtarget    | 1,641 | 1,652 | $2.49 \times 10^{-5}$ | AAAGAGGAAGCG         |
| ELF5 | HOCOMOC<br>O | 718   | 734   | $6.07 \times 10^{-6}$ | GAAGGCAGGAAGTAGAG    |
| ELK1 | hTFtarget    | 721   | 731   | $1.39 \times 10^{-5}$ | GGCAGGAAGTA          |
| ELK3 | hTFtarget    | 139   | 149   | $4.47 \times 10^{-5}$ | GGCCGGATGCA          |
| ELK4 | HOCOMOC<br>O | 720   | 732   | $8.26 \times 10^{-6}$ | AGGCAGGAAGTAG        |
| EMX1 | CISBP        | 1,402 | 1,415 | $2.46 \times 10^{-5}$ | AATTTAGTTAATTG       |

|       |              |       |       |                          |                       |
|-------|--------------|-------|-------|--------------------------|-----------------------|
| EMX2  | hTFtarget    | 1,402 | 1,415 | 3.26 x 10 <sup>-5</sup>  | CAATTAACTAAATT        |
| EN2   | CISBP        | 1,311 | 1,320 | 3.16 x 10 <sup>-5</sup>  | GTTAATTGCA            |
| EPAS1 | hTFtarget    | 1,031 | 1,040 | 6.13 x 10 <sup>-7</sup>  | GCACGTACCC            |
| ERF   | hTFtarget    | 721   | 730   | 7.95 x 10 <sup>-5</sup>  | GCAGGAAGTA            |
| ERG   | hTFtarget    | 720   | 732   | 5.10 x 10 <sup>-7</sup>  | AGGCAGGAAGTAG         |
| ESR1  | hTFtarget    | 1,448 | 1,461 | 4.50 x 10 <sup>-8</sup>  | TGGCCAAGGTCACC        |
| ESR2  | HOCOMOC<br>O | 2,317 | 2,331 | 4.38 x 10 <sup>-6</sup>  | CGGCCGGCGTGACCT       |
| ESRRA | hTFtarget    | 1,445 | 1,459 | 5.39 x 10 <sup>-8</sup>  | GCCAAGGTCACCCAG       |
| ESRRB | CISBP        | 1,447 | 1,461 | 4.49 x 10 <sup>-8</sup>  | TGGCCAAGGTCACCC       |
| ESRRG | hTFtarget    | 2,313 | 2,323 | 2.05 x 10 <sup>-7</sup>  | GTCAAGGTCAC           |
| ETS1  | hTFtarget    | 1,797 | 1,817 | 8.12 x 10 <sup>-10</sup> | GCACGCTGGGAAATGGAGTCC |
| ETS2  | HOCOMOC<br>O | 719   | 731   | 4.80 x 10 <sup>-6</sup>  | GGCAGGAAGTAGA         |
| ETV1  | hTFtarget    | 721   | 731   | 3.98 x 10 <sup>-6</sup>  | GGCAGGAAGTA           |
| ETV2  | HOCOMOC<br>O | 719   | 734   | 2.92 x 10 <sup>-7</sup>  | GAAGGCAGGAAGTAGA      |
| ETV3  | hTFtarget    | 710   | 730   | 7.24 x 10 <sup>-5</sup>  | ACTGCAACCTCTACTTCCTGC |

|       |              |       |       |                         |                    |
|-------|--------------|-------|-------|-------------------------|--------------------|
| ETV4  | hTFtarget    | 721   | 731   | 3.52 x 10 <sup>-6</sup> | GGCAGGAAGTA        |
| ETV5  | hTFtarget    | 721   | 734   | 1.26 x 10 <sup>-6</sup> | GAAGGCAGGAAGTA     |
| ETV6  | CISBP        | 2,130 | 2,144 | 3.12 x 10 <sup>-6</sup> | CCGGAGGCGGGAGCG    |
| ETV7  | hTFtarget    | 721   | 731   | 3.61 x 10 <sup>-5</sup> | GGCAGGAAGTA        |
| E VX2 | TRANSFA<br>C | 794   | 810   | 9.24 x 10 <sup>-5</sup> | CCCGGCTAATTTTCTTT  |
| FEV   | HOCOMOC<br>O | 2,425 | 2,434 | 6.65 x 10 <sup>-6</sup> | CCGGGAAGCG         |
| FEZF1 | TRANSFA<br>C | 1,799 | 1,813 | 4.28 x 10 <sup>-5</sup> | GCTGGGAAATGGAGT    |
| FLI1  | hTFtarget    | 717   | 734   | 2.38 x 10 <sup>-8</sup> | GAAGGCAGGAAGTAGAGG |
| FOS   | hTFtarget    | 1,461 | 1,475 | 9.08 x 10 <sup>-6</sup> | AAGTGA CTCAGCCTC   |
| FOSB  | HOCOMOC<br>O | 1,463 | 1,471 | 1.96 x 10 <sup>-5</sup> | CTGAGTCAC          |
| FOSL1 | hTFtarget    | 1,462 | 1,473 | 1.42 x 10 <sup>-6</sup> | GGCTGAGTCACT       |
| FOSL2 | hTFtarget    | 1,462 | 1,475 | 1.86 x 10 <sup>-6</sup> | AGTGA CTCAGCCTC    |
| FOXA1 | hTFtarget    | 1,064 | 1,075 | 3.38 x 10 <sup>-5</sup> | TAGTAAACAGGT       |
| FOXA2 | hTFtarget    | 1,065 | 1,075 | 4.43 x 10 <sup>-5</sup> | TAGTAAACAGG        |

|       |              |       |       |                         |                |
|-------|--------------|-------|-------|-------------------------|----------------|
| FOXA3 | hTFtarget    | 1,065 | 1,075 | 4.51 x 10 <sup>-5</sup> | TAGTAAACAGG    |
| FOXB1 | CISBP        | 1,066 | 1,074 | 5.92 x 10 <sup>-5</sup> | CTGTTTACT      |
| FOXC1 | hTFtarget    | 947   | 959   | 4.69 x 10 <sup>-6</sup> | AATTAAATAAATA  |
| FOXC2 | hTFtarget    | 947   | 957   | 1.92 x 10 <sup>-5</sup> | TTAAATAAATA    |
| FOXD1 | hTFtarget    | 1,066 | 1,073 | 6.14 x 10 <sup>-5</sup> | GTAAACAG       |
| FOXD2 | JASPAR       | 947   | 958   | 1.02 x 10 <sup>-5</sup> | ATTAAATAAATA   |
| FOXD3 | hTFtarget    | 1,374 | 1,387 | 7.74 x 10 <sup>-5</sup> | GGTCAATAATATCT |
| FOXE1 | JASPAR       | 809   | 822   | 4.68 x 10 <sup>-5</sup> | ACTAAAATACAAA  |
| FOXF1 | JASPAR       | 1,065 | 1,075 | 4.70 x 10 <sup>-5</sup> | TAGTAAACAGG    |
| FOXG1 | TRANSFA<br>C | 1,188 | 1,199 | 1.46 x 10 <sup>-5</sup> | CTGGACCCACTC   |
| FOXI1 | hTFtarget    | 944   | 955   | 2.57 x 10 <sup>-5</sup> | TTGTATTTATTT   |
| FOXJ2 | HOCOMOC<br>O | 947   | 956   | 1.47 x 10 <sup>-5</sup> | TATTTATTTA     |
| FOXJ3 | HOCOMOC<br>O | 347   | 359   | 2.55 x 10 <sup>-5</sup> | GTATTTTTTTTTTT |
| FOXK1 | hTFtarget    | 1,063 | 1,076 | 2.70 x 10 <sup>-5</sup> | GTAGTAAACAGGTG |
| FOXK2 | JASPAR       | 1,065 | 1,075 | 2.01 x 10 <sup>-5</sup> | TAGTAAACAGG    |

|       |              |       |       |                         |                         |
|-------|--------------|-------|-------|-------------------------|-------------------------|
| FOXL1 | hTFtarget    | 946   | 958   | 1.91 x 10 <sup>-5</sup> | ATTAAATAAATAC           |
| FOXM1 | CISBP        | 1,762 | 1,769 | 1.21 x 10 <sup>-5</sup> | CGCATCCT                |
| FOXN1 | CISBP        | 2,289 | 2,298 | 1.74 x 10 <sup>-5</sup> | GACGCCGCC               |
| FOXN2 | CISBP        | 1,986 | 2,004 | 1.77 x 10 <sup>-6</sup> | GCGCGTCCCCGCGCCGCCG     |
| FOXN4 | CISBP        | 1,995 | 2,004 | 1.59 x 10 <sup>-5</sup> | GGGGACGCGC              |
| FOXO1 | JASPAR       | 1,064 | 1,074 | 4.94 x 10 <sup>-6</sup> | ACCTGTTTACT             |
| FOXP1 | hTFtarget    | 1,064 | 1,075 | 3.41 x 10 <sup>-6</sup> | TAGTAAACAGGT            |
| FOXP2 | HOCOMOC<br>O | 1,066 | 1,074 | 4.91 x 10 <sup>-6</sup> | CTGTTTACT               |
| FOXP3 | hTFtarget    | 1,067 | 1,073 | 7.93 x 10 <sup>-5</sup> | GTAAACA                 |
| GABPA | hTFtarget    | 719   | 732   | 5.79x10 <sup>-6</sup>   | TCTACTTCCTGCCT          |
| GATA3 | hTFtarget    | 300   | 310   | 8.29x10 <sup>-5</sup>   | AAAGAAAAAAAA            |
| GBX2  | CISBP        | 1,312 | 1,319 | 5.75x10 <sup>-5</sup>   | TTAATTGC                |
| GCM1  | hTFtarget    | 1,572 | 1,580 | 1.17x10 <sup>-5</sup>   | GGTGCGGGC               |
| GCM2  | CISBP        | 1,573 | 1,581 | 2.38x10 <sup>-5</sup>   | GTGCGGGCG               |
| GFI1  | hTFtarget    | 1,405 | 1,425 | 1.47x10 <sup>-5</sup>   | CAAATCAAAACAATTAATACTAA |
| GFI1B | hTFtarget    | 1,405 | 1,425 | 7.06x10 <sup>-6</sup>   | CAAATCAAAACAATTAATACTAA |
| GLI1  | hTFtarget    | 1,139 | 1,149 | 2.80x10 <sup>-5</sup>   | GACCCCCCAA              |

|       |              |       |       |                       |                       |
|-------|--------------|-------|-------|-----------------------|-----------------------|
| GLI2  | hTFtarget    | 1,136 | 1,149 | 6.21x10 <sup>-6</sup> | GACCCCCCAAAAAG        |
| GLI3  | hTFtarget    | 1,135 | 1,150 | 3.48x10 <sup>-6</sup> | CGACCCCCCAAAAAGA      |
| GLI4  | CISBP        | 1,679 | 1,699 | 3.57x10 <sup>-5</sup> | CGAGACCGGCGCTCCGGGCTA |
| GLIS1 | CISBP        | 2,294 | 2,307 | 5.55x10 <sup>-7</sup> | GGCCCCGGGGGGGCG       |
| GLIS2 | TRANSFA<br>C | 1,138 | 1,153 | 1.06x10 <sup>-6</sup> | CGACGACCCCCCAAAA      |
| GLIS3 | hTFtarget    | 1,136 | 1,149 | 6.21x10 <sup>-7</sup> | CTTTTTGGGGGGGTC       |
| GMEB1 | hTFtarget    | 1,899 | 1,907 | 3.02x10 <sup>-5</sup> | GGACGCACG             |
| GRHL1 | JASPAR       | 1,085 | 1,096 | 4.02x10 <sup>-6</sup> | AAAACCGGTCTA          |
| GRHL2 | HOCOMOC<br>O | 1,087 | 1,098 | 3.54x10 <sup>-6</sup> | GACCGGTTTTTC          |
| GSC   | CISBP        | 905   | 912   | 4.72x10 <sup>-5</sup> | ATAATCCC              |
| GSC2  | CISBP        | 905   | 912   | 8.30x10 <sup>-5</sup> | ATAATCCC              |
| HAND2 | hTFtarget    | 1,318 | 1,327 | 8.92x10 <sup>-5</sup> | AACAGATGCA            |
| HES1  | hTFtarget    | 1,537 | 1,546 | 1.26x10 <sup>-5</sup> | CTCACGTGCC            |
| HES2  | CISBP        | 1,538 | 1,550 | 2.98x10 <sup>-6</sup> | TCACGTGCCGTTC         |
| HES5  | CISBP        | 1,742 | 1,751 | 1.50x10 <sup>-5</sup> | CGCACGTGGC            |
| HES7  | CISBP        | 1,742 | 1,751 | 7.01x10 <sup>-6</sup> | CGCACGTGGC            |

|        |              |       |       |                       |                       |
|--------|--------------|-------|-------|-----------------------|-----------------------|
| HESX1  | hTFtarget    | 838   | 846   | 5.98x10 <sup>-6</sup> | CATATATAG             |
| HEY1   | hTFtarget    | 1,724 | 1,733 | 1.34x10 <sup>-5</sup> | CGCACGCGCG            |
| HEY2   | CISBP        | 1,743 | 1,751 | 7.18x10 <sup>-6</sup> | GCACGTGGC             |
| HIC1   | HOCOMOC<br>O | 2,384 | 2,392 | 2.52x10 <sup>-5</sup> | CGGGTGCCC             |
| HIF1A  | hTFtarget    | 1,029 | 1,038 | 1.31x10 <sup>-5</sup> | GTACGTGCTG            |
| HINFP  | hTFtarget    | 1,741 | 1,760 | 5.46x10 <sup>-6</sup> | GCGGGCCGAGCCACGTGCGT  |
| HKR1   | CISBP        | 2,016 | 2,036 | 1.72x10 <sup>-6</sup> | GCTGCCTCCTCCCCTCGGCGC |
| HMG20B | CISBP        | 19    | 29    | 1.62x10 <sup>-5</sup> | TTATTATTTTT           |
| HMX1   | hTFtarget    | 1,312 | 1,320 | 1.30x10 <sup>-5</sup> | GTTAATTGC             |
| HMX2   | JASPAR       | 1,308 | 1,324 | 1.05x10 <sup>-5</sup> | GTATGCAATTAACAGAT     |
| HMX3   | JASPAR       | 1,308 | 1,324 | 1.80x10 <sup>-5</sup> | GTATGCAATTAACAGAT     |
| HNF4A  | hTFtarget    | 2,335 | 2,349 | 2.38x10 <sup>-5</sup> | GCGGACTCGGGACCC       |
| HNF4G  | hTFtarget    | 1,273 | 1,287 | 7.37x10 <sup>-5</sup> | AGGGGGCAAAGTCAC       |
| HOXA13 | hTFtarget    | 1,376 | 1,386 | 6.89x10 <sup>-5</sup> | GATATTATTGA           |
| HOXA6  | hTFtarget    | 1,311 | 1,320 | 1.73x10 <sup>-5</sup> | GTTAATTGCA            |
| HOXA7  | hTFtarget    | 1,312 | 1,319 | 3.96x10 <sup>-5</sup> | GCAATTAA              |
| HOXA9  | hTFtarget    | 1,312 | 1,321 | 8.61x10 <sup>-5</sup> | TGTTAATTGC            |

|        |              |       |       |                       |                      |
|--------|--------------|-------|-------|-----------------------|----------------------|
| HOXB6  | hTFtarget    | 1,312 | 1,319 | 2.18x10 <sup>-5</sup> | TTAATTGC             |
| HOXB7  | CISBP        | 1,312 | 1,319 | 3.96x10 <sup>-5</sup> | TTAATTGC             |
| HOXB8  | hTFtarget    | 1,312 | 1,319 | 5.43x10 <sup>-5</sup> | TTAATTGC             |
| HOXC12 | CISBP        | 1,068 | 1,077 | 4.45x10 <sup>-5</sup> | GTTTACTACC           |
| HOXC4  | hTFtarget    | 1,409 | 1,416 | 8.53x10 <sup>-5</sup> | TTAATTGT             |
| HOXC6  | CISBP        | 1,312 | 1,319 | 8.06x10 <sup>-5</sup> | TTAATTGC             |
| HOXC8  | CISBP        | 1,311 | 1,319 | 6.24x10 <sup>-5</sup> | TTAATTGCA            |
| HOXD13 | hTFtarget    | 1,043 | 1,050 | 4.83x10 <sup>-5</sup> | TTGTAAAA             |
| HOXD8  | hTFtarget    | 798   | 807   | 2.44x10 <sup>-5</sup> | GAAAATTAGC           |
| HOXD9  | CISBP        | 1,312 | 1,321 | 8.12x10 <sup>-5</sup> | TGTTAATTGC           |
| HSF1   | hTFtarget    | 558   | 575   | 5.06x10 <sup>-5</sup> | GTCAGGAGATCGAGACCA   |
| IKZF1  | hTFtarget    | 185   | 192   | 1.21x10 <sup>-5</sup> | TTGGGAGG             |
| IKZF3  | JASPAR       | 718   | 732   | 3.07x10 <sup>-6</sup> | AGGCAGGAAGTAGAG      |
| INSM2  | TRANSFA<br>C | 1,229 | 1,244 | 6.46x10 <sup>-5</sup> | TGACAACCAAAACCGT     |
| IRF1   | hTFtarget    | 293   | 312   | 2.40x10 <sup>-5</sup> | CAAAATAAAAGAAAAAAAG  |
| IRF2   | HOCOMOC<br>O | 1,634 | 1,653 | 4.69x10 <sup>-5</sup> | AAGAGTTAAAGAGGAAGCGG |

|       |              |       |       |                       |                      |
|-------|--------------|-------|-------|-----------------------|----------------------|
| IRF3  | HOCOMOC<br>O | 1,841 | 1,860 | 2.47x10 <sup>-5</sup> | CGAGGAGAAAGGAAAACGCG |
| IRF4  | hTFtarget    | 1,640 | 1,657 | 2.51x10 <sup>-5</sup> | TAAAGAGGAAGCGGCAGC   |
| IRF5  | CISBP        | 559   | 568   | 7.73x10 <sup>-5</sup> | GATCGAGACC           |
| IRF7  | HOCOMOC<br>O | 1,847 | 1,856 | 4.52x10 <sup>-5</sup> | GAAAGGAAAA           |
| IRX3  | TRANSFA<br>C | 44    | 55    | 2.68x10 <sup>-7</sup> | CAACATGACAAA         |
| IRX5  | CISBP        | 44    | 55    | 1.79x10 <sup>-5</sup> | CAACATGACAAA         |
| ISL2  | JASPAR       | 1,312 | 1,319 | 7.22x10 <sup>-5</sup> | GCAATTAA             |
| JDP2  | CISBP        | 1,462 | 1,472 | 5.96x10 <sup>-5</sup> | AGTGACTCAGC          |
| JUN   | HOCOMOC<br>O | 1,463 | 1,472 | 3.31x10 <sup>-6</sup> | GCTGAGTCAC           |
| JUNB  | hTFtarget    | 1,461 | 1,475 | 4.58x10 <sup>-6</sup> | AAGTGACTCAGCCTC      |
| JUND  | HOCOMOC<br>O | 1,463 | 1,473 | 1.82x10 <sup>-6</sup> | GGCTGAGTCAC          |
| KLF1  | hTFtarget    | 1,779 | 1,793 | 1.07x10 <sup>-7</sup> | CGCTGGCCCCGCCCC      |
| KLF10 | JASPAR       | 1,779 | 1,787 | 1.50x10 <sup>-6</sup> | GGGGCGGGG            |

|       |              |       |       |                       |                     |
|-------|--------------|-------|-------|-----------------------|---------------------|
| KLF11 | hTFtarget    | 1,927 | 1,937 | 6.59x10 <sup>-6</sup> | GACCCGCCCCC         |
| KLF12 | CISBP        | 1,778 | 1,792 | 3.95x10 <sup>-8</sup> | GCTGGCCCCGCCCCT     |
| KLF13 | hTFtarget    | 1,777 | 1,789 | 5.12x10 <sup>-6</sup> | GGCCCCGCCCCTG       |
| KLF14 | CISBP        | 1,776 | 1,789 | 5.76x10 <sup>-7</sup> | GGCCCCGCCCCTGC      |
| KLF15 | hTFtarget    | 1,779 | 1,793 | 7.03x10 <sup>-8</sup> | CGCTGGCCCCGCCCC     |
| KLF16 | JASPAR       | 1,927 | 1,937 | 8.10x10 <sup>-7</sup> | GACCCGCCCCC         |
| KLF17 | CISBP        | 1,778 | 1,789 | 1.13x10 <sup>-5</sup> | GGCCCCGCCCCT        |
| KLF2  | CISBP        | 1,779 | 1,789 | 6.59x10 <sup>-7</sup> | GGCCCCGCCCC         |
| KLF3  | HOCOMOC<br>O | 1,774 | 1,792 | 1.40x10 <sup>-6</sup> | TTGCAGGGGCGGGGCCAGC |
| KLF4  | CISBP        | 1,779 | 1,789 | 1.59x10 <sup>-6</sup> | GGCCCCGCCCC         |
| KLF5  | hTFtarget    | 1,779 | 1,788 | 3.39x10 <sup>-7</sup> | GCCCCGCCCC          |
| KLF6  | hTFtarget    | 1,776 | 1,794 | 1.95x10 <sup>-7</sup> | GCAGGGGCGGGGCCAGCGC |
| KLF7  | CISBP        | 1,779 | 1,789 | 7.65x10 <sup>-8</sup> | GGCCCCGCCCC         |
| KLF8  | CISBP        | 1,779 | 1,788 | 1.67x10 <sup>-6</sup> | GCCCCGCCCC          |
| KLF9  | hTFtarget    | 1,775 | 1,789 | 1.05x10 <sup>-6</sup> | TGCAGGGGCGGGGCC     |
| LBX2  | CISBP        | 1,405 | 1,416 | 8.81x10 <sup>-5</sup> | ACAATTAATAA         |
| LCORL | CISBP        | 874   | 881   | 6.14x10 <sup>-5</sup> | CCTAAATT            |

|        |              |       |       |                       |                        |
|--------|--------------|-------|-------|-----------------------|------------------------|
| LEF1   | HOCOMOC<br>O | 806   | 819   | 6.56x10 <sup>-5</sup> | TCTTTTGTATTTTT         |
| LHX2   | hTFtarget    | 1,401 | 1,415 | 6.84x10 <sup>-5</sup> | GAATTTAGTTAATTG        |
| LHX3   | JASPAR       | 948   | 960   | 4.23x10 <sup>-5</sup> | GAATTAATAAAT           |
| LIN28B | CISBP        | 2,355 | 2,369 | 1.98x10 <sup>-6</sup> | CGCGAAGCCGCGGCG        |
| MAFA   | hTFtarget    | 1,104 | 1,116 | 3.76x10 <sup>-5</sup> | TGTCAGCAGAAGG          |
| MAFB   | CISBP        | 1,299 | 1,316 | 1.74x10 <sup>-5</sup> | ATTGCATACATCAGTGGT     |
| MAFF   | HOCOMOC<br>O | 448   | 469   | 2.26x10 <sup>-5</sup> | CAGGAGGCTGAGGCAGTAGAAT |
| MAFG   | hTFtarget    | 1,109 | 1,118 | 1.13x10 <sup>-5</sup> | AATGTCAGCA             |
| MAFK   | hTFtarget    | 1,461 | 1,475 | 3.27x10 <sup>-6</sup> | AAGTGA CTCAGCCTC       |
| MAX    | hTFtarget    | 1,742 | 1,751 | 5.03x10 <sup>-7</sup> | CGCACGTGGC             |
| MAZ    | hTFtarget    | 2,132 | 2,153 | 1.53x10 <sup>-7</sup> | GGAGGCGGGAGCGAGCGAGGAG |
| MBD2   | HOCOMOC<br>O | 2,325 | 2,335 | 6.77x10 <sup>-6</sup> | CCGGCCGGGGG            |
| MECOM  | hTFtarget    | 1,378 | 1,393 | 2.58x10 <sup>-5</sup> | ATGAAAAGATATTATT       |
| MECP2  | HOCOMOC<br>O | 1,682 | 1,688 | 3.60x10 <sup>-5</sup> | CCCGGAG                |

|        |              |       |       |                       |                 |
|--------|--------------|-------|-------|-----------------------|-----------------|
| MEF2A  | hTFtarget    | 809   | 823   | 3.50x10 <sup>-6</sup> | TACTAAAAATACAAA |
| MEF2B  | JASPAR       | 1,344 | 1,355 | 1.50x10 <sup>-6</sup> | ACTATTAATAGC    |
| MEF2C  | hTFtarget    | 1,345 | 1,356 | 1.42x10 <sup>-6</sup> | TACTATTAATAG    |
| MEF2D  | hTFtarget    | 1,344 | 1,355 | 2.44x10 <sup>-6</sup> | ACTATTAATAGC    |
| MEIS1  | JASPAR       | 988   | 1,002 | 1.38x10 <sup>-5</sup> | GGCTGTCAATGTGCT |
| MEIS2  | hTFtarget    | 989   | 996   | 1.47x10 <sup>-5</sup> | TTGACAGC        |
| MEIS3  | hTFtarget    | 989   | 996   | 2.94x10 <sup>-5</sup> | TTGACAGC        |
| MEOX2  | CISBP        | 962   | 975   | 6.82x10 <sup>-5</sup> | GTGATGATGAATAA  |
| MITF   | CISBP        | 575   | 584   | 1.47x10 <sup>-5</sup> | CCTCGTGATC      |
| MLX    | CISBP        | 1,538 | 1,545 | 2.20x10 <sup>-5</sup> | GCACGTGA        |
| MLXIP  | JASPAR       | 1,743 | 1,750 | 3.40x10 <sup>-5</sup> | GCACGTGG        |
| MLXIPL | hTFtarget    | 1,537 | 1,546 | 7.23x10 <sup>-5</sup> | CTCACGTGCC      |
| MNT    | CISBP        | 1,742 | 1,750 | 1.71x10 <sup>-5</sup> | CCACGTGCG       |
| MSX1   | JASPAR       | 1,312 | 1,319 | 6.14x10 <sup>-5</sup> | GCAATTAA        |
| MSX2   | hTFtarget    | 1,312 | 1,319 | 3.96x10 <sup>-5</sup> | TTAATTGC        |
| MTF1   | CISBP        | 1,152 | 1,160 | 7.67x10 <sup>-6</sup> | CGTGTGCAC       |
| MTF-1  | TRANSFA<br>C | 1,148 | 1,161 | 3.25x10 <sup>-5</sup> | AGTGCACACGACGA  |

|         |              |       |       |                       |                 |
|---------|--------------|-------|-------|-----------------------|-----------------|
| MXI1    | TRANSFA<br>C | 1,743 | 1,757 | 8.30x10 <sup>-7</sup> | GCACGTGGCTCGGCC |
| MYB     | HOCOMOC<br>O | 2,005 | 2,016 | 1.73x10 <sup>-6</sup> | GGTGACCGTTGG    |
| MYBL1   | HOCOMOC<br>O | 2,005 | 2,019 | 2.50x10 <sup>-6</sup> | GGTGACCGTTGGCGC |
| MYBL2   | CISBP        | 2,007 | 2,015 | 4.57x10 <sup>-5</sup> | CAACGGTCA       |
| MYC     | TRANSFA<br>C | 1,742 | 1,751 | 5.03x10 <sup>-7</sup> | CGCACGTGGC      |
| MYCN    | TRANSFA<br>C | 1,742 | 1,751 | 5.03x10 <sup>-7</sup> | CGCACGTGGC      |
| MYF6    | hTFtarget    | 1,060 | 1,071 | 2.94x10 <sup>-5</sup> | AAACAGGTGACC    |
| MYNN    | CISBP        | 294   | 305   | 8.01x10 <sup>-5</sup> | TTCTTTTATTTT    |
| MYOD1   | hTFtarget    | 1,060 | 1,071 | 8.42x10 <sup>-5</sup> | AAACAGGTGACC    |
| MZF1    | CISBP        | 2,445 | 2,454 | 2.13x10 <sup>-5</sup> | GGATCCCCCA      |
| NANOG   | hTFtarget    | 1,312 | 1,319 | 2.18x10 <sup>-5</sup> | TTAATTGC        |
| NEUROD2 | HOCOMOC<br>O | 1,318 | 1,326 | 4.98x10 <sup>-5</sup> | AACAGATGC       |

|        |              |       |       |                       |                       |
|--------|--------------|-------|-------|-----------------------|-----------------------|
| NFAT5  | JASPAR       | 1,092 | 1,103 | 4.10x10 <sup>-5</sup> | AGGTGGAAAAAC          |
| NFATC1 | hTFtarget    | 1,093 | 1,102 | 1.74x10 <sup>-5</sup> | TTTTTCCACC            |
| NFATC2 | HOCOMOC<br>O | 1,092 | 1,100 | 3.27x10 <sup>-5</sup> | TGGAAAAAC             |
| NFATC3 | hTFtarget    | 1,092 | 1,100 | 1.98x10 <sup>-5</sup> | TGGAAAAAC             |
| NFATC4 | hTFtarget    | 1,092 | 1,101 | 5.77x10 <sup>-5</sup> | GTTTTTCCAC            |
| NFE2   | hTFtarget    | 1,461 | 1,473 | 4.66x10 <sup>-6</sup> | AAGTGA CTCAGCC        |
| NFE2L1 | hTFtarget    | 1,463 | 1,471 | 9.53x10 <sup>-5</sup> | GTGACTCAG             |
| NFE2L2 | hTFtarget    | 1,463 | 1,473 | 3.83x10 <sup>-6</sup> | GTGACTCAGCC           |
| NFIA   | CISBP        | 1,255 | 1,264 | 3.74x10 <sup>-5</sup> | ATTGCCAAGT            |
| NFIB   | JASPAR       | 2,376 | 2,396 | 4.70x10 <sup>-6</sup> | GCCCTGGACGGGTGCCCGGGG |
| NFIC   | hTFtarget    | 2,378 | 2,394 | 3.44x10 <sup>-7</sup> | CCGGGCACCCGTCCAGG     |
| NFIX   | CISBP        | 2,378 | 2,394 | 1.28x10 <sup>-5</sup> | CCTGGACGGGTGCCCGG     |
| NFKB1  | hTFtarget    | 2,302 | 2,312 | 2.11x10 <sup>-5</sup> | GGGGCGGCCCC           |
| NFKB2  | hTFtarget    | 533   | 545   | 2.94x10 <sup>-5</sup> | TGGTGAAACCCCG         |
| NHLH1  | hTFtarget    | 1,654 | 1,671 | 8.53x10 <sup>-6</sup> | CAGCCGCGCCTGCGCCCA    |
| NHLH2  | CISBP        | 1,654 | 1,671 | 1.98x10 <sup>-5</sup> | CAGCCGCGCCTGCGCCCA    |
| NKX1-2 | CISBP        | 1,312 | 1,320 | 5.46x10 <sup>-5</sup> | GTTAATTGC             |

|        |              |       |       |                       |                      |
|--------|--------------|-------|-------|-----------------------|----------------------|
| NKX2-1 | hTFtarget    | 1,216 | 1,225 | 1.90x10 <sup>-5</sup> | CTTGAGTGCG           |
| NKX2-2 | hTFtarget    | 1,214 | 1,227 | 4.47x10 <sup>-5</sup> | CCCGCACTCAAGTT       |
| NKX2-4 | CISBP        | 1,192 | 1,201 | 5.77x10 <sup>-5</sup> | TCGAGTGGGT           |
| NKX2-5 | HOCOMOC<br>O | 257   | 266   | 1.37x10 <sup>-5</sup> | GCTGGAGTGC           |
| NKX2-8 | hTFtarget    | 1,194 | 1,201 | 2.41x10 <sup>-5</sup> | TCGAGTGG             |
| NKX2-9 | CISBP        | 1,216 | 1,225 | 4.03x10 <sup>-5</sup> | CTTGAGTGCG           |
| NKX6-1 | HOCOMOC<br>O | 1,336 | 1,354 | 3.61x10 <sup>-5</sup> | AGTATTTGGCTATTAATAG  |
| NKX6-2 | CISBP        | 1,312 | 1,319 | 4.83x10 <sup>-5</sup> | TTAATTGC             |
| NKX6-3 | CISBP        | 1,312 | 1,320 | 7.37x10 <sup>-5</sup> | GTTAATTGC            |
| NPAS2  | CISBP        | 1,742 | 1,751 | 1.08x10 <sup>-5</sup> | CGCACGTGGC           |
| NPAS4  | JASPAR       | 400   | 410   | 9.22x10 <sup>-5</sup> | GATCGTGCCAC          |
| NR1D1  | hTFtarget    | 862   | 881   | 8.50x10 <sup>-6</sup> | AATTTAGGTCAGGAGATCGA |
| NR1D2  | CISBP        | 862   | 881   | 1.28x10 <sup>-5</sup> | AATTTAGGTCAGGAGATCGA |
| NR1H2  | CISBP        | 871   | 886   | 2.34x10 <sup>-5</sup> | GGATCAATTTAGGTCA     |
| NR1H3  | HOCOMOC<br>O | 1,449 | 1,463 | 2.08x10 <sup>-5</sup> | CTTGGCCAAGGTCAC      |

|       |              |       |       |                       |                     |
|-------|--------------|-------|-------|-----------------------|---------------------|
| NR1H4 | HOCOMOC<br>O | 1,973 | 1,991 | 1.86x10 <sup>-5</sup> | AGGGGCGGCGGGCGGGCGG |
| NR1I2 | hTFtarget    | 1,441 | 1,455 | 7.13x10 <sup>-7</sup> | AGGTCACCCAGTTCG     |
| NR1I3 | hTFtarget    | 1,572 | 1,587 | 3.81x10 <sup>-5</sup> | GGTGCGGGCGGGTACA    |
| NR2C1 | CISBP        | 2,315 | 2,324 | 2.81x10 <sup>-5</sup> | CAAGGTCACG          |
| NR2C2 | hTFtarget    | 1,620 | 1,634 | 5.14x10 <sup>-6</sup> | ACCGCTCCGAGTGA      |
| NR2E1 | CISBP        | 570   | 579   | 1.79x10 <sup>-5</sup> | CGAGGTCAGG          |
| NR2E3 | hTFtarget    | 331   | 340   | 3.38x10 <sup>-5</sup> | CAAGATCACA          |
| NR2F1 | hTFtarget    | 571   | 586   | 6.95x10 <sup>-6</sup> | CGGATCACGAGGTCAG    |
| NR2F2 | HOCOMOC<br>O | 569   | 581   | 7.70x10 <sup>-6</sup> | CACGAGGTCAGGA       |
| NR2F6 | CISBP        | 572   | 586   | 6.75x10 <sup>-6</sup> | CGGATCACGAGGTCA     |
| NR3C2 | hTFtarget    | 1,580 | 1,588 | 2.82x10 <sup>-5</sup> | CGGGTACAC           |
| NR4A1 | hTFtarget    | 2,122 | 2,131 | 2.04x10 <sup>-5</sup> | GGAAGGTCAC          |
| NR4A2 | HOCOMOC<br>O | 2,122 | 2,130 | 1.14x10 <sup>-5</sup> | GAAGGTCAC           |
| NR5A1 | hTFtarget    | 2,313 | 2,323 | 2.05x10 <sup>-7</sup> | GTCAAGGTCAC         |
| NR5A2 | hTFtarget    | 2,313 | 2,323 | 2.05x10 <sup>-7</sup> | GTCAAGGTCAC         |

|         |              |       |       |                       |                        |
|---------|--------------|-------|-------|-----------------------|------------------------|
| NR6A1   | hTFtarget    | 63    | 75    | 1.90x10 <sup>-5</sup> | GAGTTCAAGACCA          |
| NRF1    | JASPAR       | 1,704 | 1,718 | 2.64x10 <sup>-8</sup> | GCGTGCGCGTGCGCG        |
| NRL     | CISBP        | 1,105 | 1,115 | 2.30x10 <sup>-5</sup> | GTCAGCAGAAG            |
| OBOX1   | CISBP        | 903   | 912   | 6.60x10 <sup>-5</sup> | ATAATCCCAA             |
| OBOX5   | CISBP        | 905   | 912   | 5.04x10 <sup>-5</sup> | ATAATCCC               |
| OBOX6   | CISBP        | 904   | 912   | 7.49x10 <sup>-5</sup> | ATAATCCCA              |
| ONECUT2 | hTFtarget    | 1,415 | 1,425 | 7.35x10 <sup>-5</sup> | GTTTTGATTTG            |
| OSR1    | TRANSFA<br>C | 1,068 | 1,083 | 8.10x10 <sup>-5</sup> | GCTGACGGTAGTAAAC       |
| OSR2    | HOCOMOC<br>O | 466   | 481   | 6.64x10 <sup>-6</sup> | GTCCCAGCTACTCAGG       |
| OTX1    | hTFtarget    | 118   | 125   | 6.19x10 <sup>-5</sup> | GTAATCCC               |
| OTX2    | hTFtarget    | 903   | 914   | 4.02x10 <sup>-5</sup> | TTGGGATTATAG           |
| P53     | TRANSFA<br>C | 1,175 | 1,194 | 4.14x10 <sup>-6</sup> | CGGCATGTCTGGTCTGGACC   |
| PATZ1   | hTFtarget    | 2,412 | 2,433 | 1.37x10 <sup>-7</sup> | CGGGAAGCGGCGGCGGGGGCGC |
| PAX1    | JASPAR       | 2,375 | 2,391 | 7.13x10 <sup>-5</sup> | GGCCCTGGACGGGTGCC      |
| PAX2    | hTFtarget    | 2,375 | 2,392 | 5.74x10 <sup>-5</sup> | GGCCCTGGACGGGTGCC      |

|        |              |       |       |                       |                                   |
|--------|--------------|-------|-------|-----------------------|-----------------------------------|
| PAX3   | hTFtarget    | 1,313 | 1,320 | 2.18x10 <sup>-5</sup> | GTTAATTG                          |
| PAX4   | JASPAR       | 1,368 | 1,397 | 5.84x10 <sup>-6</sup> | GACTATGAAAAGATATTATTGACC<br>CCCCC |
| PAX5   | hTFtarget    | 662   | 682   | 1.06x10 <sup>-9</sup> | ACCTGGGCAACAGAGCAAGAC             |
| PAX6   | hTFtarget    | 1,954 | 1,970 | 2.22x10 <sup>-6</sup> | GCACGCCCGGGCGCGCT                 |
| PAX7   | CISBP        | 2,318 | 2,327 | 3.42x10 <sup>-5</sup> | GGTCACGCCG                        |
| PAX8   | hTFtarget    | 786   | 805   | 9.98x10 <sup>-5</sup> | AAATTAGCCGGGCGTGGTGG              |
| PAX9   | JASPAR       | 2,375 | 2,391 | 8.76x10 <sup>-5</sup> | GGCCCTGGACGGGTGCC                 |
| PBX1   | CISBP        | 2,310 | 2,318 | 2.34x10 <sup>-5</sup> | CTTGACGGG                         |
| PBX2   | hTFtarget    | 989   | 1000  | 3.85x10 <sup>-5</sup> | CACATTGACAGC                      |
| PBX3   | hTFtarget    | 273   | 289   | 9.60x10 <sup>-5</sup> | AACAGAGTGAGAGCCTG                 |
| PBX4   | CISBP        | 2,309 | 2,318 | 8.87x10 <sup>-5</sup> | CTTGACGGGG                        |
| PEG3   | TRANSFA<br>C | 1,587 | 1,594 | 8.01x10 <sup>-5</sup> | GTGGGAGT                          |
| PHOX2B | hTFtarget    | 794   | 803   | 1.07x10 <sup>-5</sup> | CCCGGCTAAT                        |
| PITX1  | JASPAR       | 905   | 912   | 9.40x10 <sup>-5</sup> | ATAATCCC                          |
| PITX2  | TRANSFA<br>C | 116   | 126   | 5.53x10 <sup>-7</sup> | TGTAATCCCAG                       |

|         |              |       |       |                       |                     |
|---------|--------------|-------|-------|-----------------------|---------------------|
| PITX3   | CISBP        | 118   | 125   | 4.72x10 <sup>-5</sup> | GTAATCCC            |
| PKNOX1  | CISBP        | 988   | 995   | 5.35x10 <sup>-5</sup> | TGACAGCC            |
| PKNOX2  | CISBP        | 988   | 997   | 2.86x10 <sup>-5</sup> | ATTGACAGCC          |
| PLAG1   | TRANSFA<br>C | 2,251 | 2,269 | 3.16x10 <sup>-7</sup> | GCGGCGGGCCGGGCTCGGG |
| PLAGL1  | CISBP        | 2,477 | 2,486 | 3.39x10 <sup>-7</sup> | GGGGCCCCCC          |
| PLAGL2  | JASPAR       | 2,477 | 2,486 | 4.02x10 <sup>-6</sup> | GGGGCCCCCC          |
| POU1F1  | hTFtarget    | 1,303 | 1,315 | 4.25x10 <sup>-5</sup> | TTGCATACATCAG       |
| POU2F2  | hTFtarget    | 1,303 | 1,314 | 3.52x10 <sup>-6</sup> | CTGATGTATGCA        |
| POU2F3  | hTFtarget    | 1,532 | 1,542 | 8.21x10 <sup>-5</sup> | GGACGCTCACG         |
| POU3F1  | hTFtarget    | 1,303 | 1,315 | 1.49x10 <sup>-5</sup> | CTGATGTATGCAA       |
| POU3F2  | hTFtarget    | 955   | 971   | 2.33x10 <sup>-5</sup> | TAATTCTGTGATGATGA   |
| POU3F3  | hTFtarget    | 1,304 | 1,315 | 7.74x10 <sup>-5</sup> | TTGCATACATCA        |
| POU3F4  | CISBP        | 1,303 | 1,315 | 1.83x10 <sup>-5</sup> | TTGCATACATCAG       |
| POU4F3  | CISBP        | 968   | 975   | 5.88x10 <sup>-5</sup> | TTATTCAT            |
| POU5F1  | CISBP        | 351   | 365   | 5.77x10 <sup>-5</sup> | TTTTTTTTTTTGAGA     |
| POU5F1B | CISBP        | 1,312 | 1,318 | 7.93x10 <sup>-5</sup> | TAATTGC             |
| POU6F1  | hTFtarget    | 1,009 | 1,018 | 9.75x10 <sup>-5</sup> | TTAAGGAGAA          |

|        |              |       |       |                       |                          |
|--------|--------------|-------|-------|-----------------------|--------------------------|
| PPARD  | hTFtarget    | 2,315 | 2,330 | 5.71x10 <sup>-5</sup> | CAAGGTCACGCCGGCC         |
| PPARG  | hTFtarget    | 1,272 | 1,291 | 1.42x10 <sup>-6</sup> | CTGGGTGACTTTGCCCCCTA     |
| PRDM1  | hTFtarget    | 1,843 | 1,853 | 7.11x10 <sup>-6</sup> | TCCTTTCTCCT              |
| PRDM16 | HOCOMOC<br>O | 1,893 | 1,902 | 4.39x10 <sup>-5</sup> | CCTCAGGGAC               |
| PRDM4  | CISBP        | 2,421 | 2,440 | 2.92x10 <sup>-5</sup> | CCGCCGCTTCCCGGCTTCCC     |
| PRDM5  | HOCOMOC<br>O | 217   | 231   | 1.04x10 <sup>-5</sup> | CCAGGAGTTCAAGGC          |
| PRDM6  | CISBP        | 340   | 360   | 2.33x10 <sup>-6</sup> | GTCCTTGTATTTTTTTTTTTT    |
| PRDM9  | CISBP        | 2,405 | 2,428 | 1.38x10 <sup>-7</sup> | GGTCCTGGCGCCCCCGCCGCCGCT |
| PROX1  | CISBP        | 656   | 667   | 7.20x10 <sup>-5</sup> | GAGGGAGTCTTG             |
| PTF1A  | HOCOMOC<br>O | 2,022 | 2,039 | 2.37x10 <sup>-5</sup> | GCGGCTGCCTCCTCCCCT       |
| RARA   | hTFtarget    | 211   | 230   | 2.12x10 <sup>-7</sup> | TGGAGTCCAGGAGTTCAAGG     |
| RARB   | CISBP        | 1,448 | 1,457 | 4.37x10 <sup>-6</sup> | CAAGGTCACC               |
| RARG   | HOCOMOC<br>O | 2,317 | 2,334 | 7.27x10 <sup>-7</sup> | AGGTCACGCCGGCCGGGG       |
| RBAK   | CISBP        | 2,019 | 2,033 | 5.25x10 <sup>-6</sup> | GCCTCCTCCCCTCGG          |

|       |              |       |       |                       |                                    |
|-------|--------------|-------|-------|-----------------------|------------------------------------|
| RBPJ  | HOCOMOC<br>O | 1,804 | 1,814 | 2.99x10 <sup>-5</sup> | CGCTGGGAAAT                        |
| RBPJL | CISBP        | 1,804 | 1,813 | 7.62x10 <sup>-5</sup> | ATTTCCCAGC                         |
| REL   | hTFtarget    | 1,090 | 1,099 | 7.53x10 <sup>-5</sup> | CGGTTTTTCC                         |
| RELA  | CISBP        | 188   | 217   | 7.42x10 <sup>-5</sup> | GACTCCAGCTATCCTCCCTCCTCAG<br>CCTCC |
| REST  | hTFtarget    | 107   | 120   | 1.46x10 <sup>-6</sup> | TCCAAGGTGCTGGG                     |
| RFX1  | HOCOMOC<br>O | 1,813 | 1,834 | 3.11x10 <sup>-6</sup> | CCTGGCGTTGCCGCGGGGCACG             |
| RFX2  | HOCOMOC<br>O | 2,097 | 2,118 | 2.59x10 <sup>-5</sup> | GGCTGTGGGGAGGGCGACGGAG             |
| RFX3  | TRANSFA<br>C | 1,813 | 1,835 | 8.21x10 <sup>-5</sup> | CGTGCCCCGCGGCAACGCCAGGA            |
| RFX4  | CISBP        | 672   | 681   | 7.19x10 <sup>-5</sup> | GTTGCCCAGG                         |
| RFX5  | hTFtarget    | 2,003 | 2,019 | 6.64x10 <sup>-6</sup> | GCGCCAACGGTCACCGC                  |
| RFX6  | HOCOMOC<br>O | 670   | 680   | 6.93x10 <sup>-6</sup> | CTGTTGCCCAG                        |
| RFX7  | JASPAR       | 1,821 | 1,829 | 1.83x10 <sup>-5</sup> | CGTTGCCGC                          |

|        |              |       |       |                       |                        |
|--------|--------------|-------|-------|-----------------------|------------------------|
| RHOXF1 | CISBP        | 905   | 912   | 7.40x10 <sup>-5</sup> | ATAATCCC               |
| RORA   | hTFtarget    | 863   | 881   | 2.31x10 <sup>-6</sup> | AATTTAGGTCAGGAGATCG    |
| RORB   | CISBP        | 862   | 881   | 1.62x10 <sup>-6</sup> | AATTTAGGTCAGGAGATCGA   |
| RORC   | hTFtarget    | 862   | 881   | 2.91x10 <sup>-6</sup> | AATTTAGGTCAGGAGATCGA   |
| RUNX1  | hTFtarget    | 1,643 | 1,654 | 5.02x10 <sup>-5</sup> | GCCGCTTCCTCT           |
| RUNX3  | hTFtarget    | 1,228 | 1,248 | 1.41x10 <sup>-5</sup> | GTGACAACCAAAACCGTGTTT  |
| RXRA   | HOCOMOC<br>O | 63    | 83    | 1.70x10 <sup>-7</sup> | GAGCCCAGGAGTTCAAGACCA  |
| RXRB   | HOCOMOC<br>O | 570   | 579   | 3.91x10 <sup>-5</sup> | CGAGGTCAGG             |
| RXRG   | HOCOMOC<br>O | 212   | 233   | 2.70x10 <sup>-7</sup> | GGAGTCCAGGAGTTCAAGGCTG |
| SALL1  | TRANSFA<br>C | 2,404 | 2,415 | 6.04x10 <sup>-5</sup> | GGGTCCTGGCGC           |
| SALL2  | TRANSFA<br>C | 138   | 151   | 5.31x10 <sup>-6</sup> | CTGCATCCGGCCAG         |
| SALL4  | HOCOMOC<br>O | 2,101 | 2,110 | 2.38x10 <sup>-5</sup> | GTGGGGAGGG             |

|       |              |       |       |                       |                    |
|-------|--------------|-------|-------|-----------------------|--------------------|
| SCRT1 | CISBP        | 1,063 | 1,074 | 3.43x10 <sup>-5</sup> | AGTAAACAGGTG       |
| SCRT2 | TRANSFA<br>C | 389   | 406   | 2.29x10 <sup>-5</sup> | GCTGGAGTGTAGTGGCAC |
| SIX1  | CISBP        | 1,125 | 1,134 | 6.98x10 <sup>-6</sup> | ATGATACCCG         |
| SIX2  | CISBP        | 376   | 385   | 8.18x10 <sup>-6</sup> | CCGTGTCGCC         |
| SIX3  | JASPAR       | 1,122 | 1,138 | 2.02x10 <sup>-5</sup> | GGACGGGTATCATTCTT  |
| SIX4  | CISBP        | 1,126 | 1,134 | 4.03x10 <sup>-6</sup> | ATGATACCC          |
| SIX5  | hTFtarget    | 1,799 | 1,808 | 3.39x10 <sup>-5</sup> | GAAATGGAGT         |
| SIX6  | CISBP        | 1,126 | 1,136 | 3.21x10 <sup>-6</sup> | GAATGATACCC        |
| SMAD2 | hTFtarget    | 619   | 630   | 3.31x10 <sup>-5</sup> | TGGCTCACTCCT       |
| SMAD3 | HOCOMOC<br>O | 426   | 437   | 1.60x10 <sup>-7</sup> | CTCTGCCTCCTG       |
| SMAD4 | hTFtarget    | 1,177 | 1,186 | 3.71x10 <sup>-5</sup> | GCATGTCTGG         |
| SMAD5 | TRANSFA<br>C | 968   | 979   | 7.28x10 <sup>-5</sup> | ATGAATAAACCA       |
| SMAD7 | TRANSFA<br>C | 1,042 | 1,053 | 3.73x10 <sup>-5</sup> | GTTTTGTAAAAC       |
| SNAI1 | CISBP        | 988   | 997   | 2.71x10 <sup>-5</sup> | GGCTGTCAAT         |

|        |              |       |       |                       |                   |
|--------|--------------|-------|-------|-----------------------|-------------------|
| SNAI2  | hTFtarget    | 1,063 | 1,072 | 4.87x10 <sup>-5</sup> | CACCTGTTTA        |
| SNAI3  | CISBP        | 1,061 | 1,070 | 8.93x10 <sup>-5</sup> | GTCACCTGTT        |
| SOHLH2 | CISBP        | 1,537 | 1,546 | 1.53x10 <sup>-5</sup> | CTCACGTGCC        |
| SOX1   | CISBP        | 964   | 973   | 2.14x10 <sup>-5</sup> | GATGATGAAT        |
| SOX10  | hTFtarget    | 993   | 1006  | 4.66x10 <sup>-5</sup> | TCAATGTGCTGTGA    |
| SOX11  | CISBP        | 1,412 | 1,420 | 7.82x10 <sup>-5</sup> | ATTGTTTTG         |
| SOX14  | CISBP        | 1,412 | 1,419 | 4.83x10 <sup>-5</sup> | AAAACAAT          |
| SOX15  | CISBP        | 1,412 | 1,420 | 4.37x10 <sup>-5</sup> | ATTGTTTTG         |
| SOX17  | CISBP        | 879   | 887   | 2.19x10 <sup>-5</sup> | AGGATCAAT         |
| SOX18  | CISBP        | 1,412 | 1,419 | 4.83x10 <sup>-5</sup> | AAAACAAT          |
| SOX2   | hTFtarget    | 1,842 | 1,854 | 1.52x10 <sup>-5</sup> | TTCCTTCTCCTC      |
| SOX21  | CISBP        | 1,412 | 1,420 | 3.96x10 <sup>-5</sup> | ATTGTTTTG         |
| SOX3   | CISBP        | 1,412 | 1,419 | 2.65x10 <sup>-5</sup> | ATTGTTTT          |
| SOX4   | HOCOMOC<br>O | 1,842 | 1,853 | 2.44x10 <sup>-5</sup> | TCCTTCTCCTC       |
| SOX6   | CISBP        | 1,412 | 1,420 | 5.98x10 <sup>-6</sup> | ATTGTTTTG         |
| SOX7   | CISBP        | 1,412 | 1,419 | 8.79x10 <sup>-5</sup> | AAAACAAT          |
| SOX8   | CISBP        | 1,407 | 1,423 | 4.99x10 <sup>-5</sup> | AGTTAATTGTTTTGATT |

|        |              |       |       |                       |                        |
|--------|--------------|-------|-------|-----------------------|------------------------|
| SOX9   | hTFtarget    | 992   | 1,007 | 1.23x10 <sup>-5</sup> | GTCAATGTGCTGTGAG       |
| SP1    | hTFtarget    | 1,777 | 1,798 | 1.06x10 <sup>-9</sup> | CAGGGGCGGGGCCAGCGCAGGG |
| SP110  | CISBP        | 1,792 | 1,800 | 2.65x10 <sup>-5</sup> | CGCAGGGAC              |
| SP2    | HOCOMOC<br>O | 2,476 | 2,497 | 4.25x10 <sup>-8</sup> | GAGGCGGCGGCGGGGCCCCCG  |
| SP3    | HOCOMOC<br>O | 1,774 | 1,793 | 1.05x10 <sup>-7</sup> | TTGCAGGGGCGGGGCCAGCG   |
| SP4    | CISBP        | 1,777 | 1,789 | 3.05x10 <sup>-7</sup> | GGCCCCGCCCTG           |
| SP5    | TRANSFA<br>C | 2,270 | 2,282 | 1.42x10 <sup>-7</sup> | TCCCCGCCGCCG           |
| SP8    | CISBP        | 1,927 | 1,938 | 8.83x10 <sup>-6</sup> | GACCCGCCCCCG           |
| SP9    | JASPAR       | 1,777 | 1,788 | 1.02x10 <sup>-5</sup> | GCCCCGCCCTG            |
| SPDEF  | CISBP        | 2,084 | 2,093 | 3.04x10 <sup>-5</sup> | GCCCGGATCT             |
| SPI1   | JASPAR       | 1,639 | 1,655 | 1.41x10 <sup>-6</sup> | TTAAAGAGGAAGCGGCA      |
| SPIB   | hTFtarget    | 1,641 | 1,652 | 8.78x10 <sup>-7</sup> | AAAGAGGAAGCG           |
| SPIC   | CISBP        | 1,642 | 1,650 | 1.34x10 <sup>-5</sup> | AAGAGGAAG              |
| SPZ1   | JASPAR       | 534   | 544   | 6.38x10 <sup>-5</sup> | GGGGTTTCACC            |
| SREBF1 | hTFtarget    | 2,212 | 2,222 | 5.05x10 <sup>-6</sup> | GATCGGGTGAG            |

|        |              |       |       |                       |                           |
|--------|--------------|-------|-------|-----------------------|---------------------------|
| SREBF2 | hTFtarget    | 692   | 701   | 1.93x10 <sup>-5</sup> | ATCGCGCCAC                |
| SRY    | hTFtarget    | 1,390 | 1,402 | 7.56x10 <sup>-5</sup> | TCAATGACTATGA             |
| STAT2  | hTFtarget    | 1,844 | 1,862 | 5.91x10 <sup>-5</sup> | GGAGAAAGGAAAACGCGCG       |
| STAT3  | HOCOMOC<br>O | 2,425 | 2,436 | 4.33x10 <sup>-5</sup> | CGCTTCCCGGCT              |
| STAT5A | HOCOMOC<br>O | 1,494 | 1,503 | 8.90x10 <sup>-5</sup> | TTCACAGAAG                |
| STAT5B | HOCOMOC<br>O | 1,494 | 1,505 | 2.41x10 <sup>-5</sup> | CTTCTGTGAAAT              |
| T      | hTFtarget    | 318   | 342   | 1.48x10 <sup>-5</sup> | TGTAATATTTGTCTGTGATCTTGTT |
| TAL1   | hTFtarget    | 93    | 111   | 9.98x10 <sup>-5</sup> | TTGGAAGGCTGAGATGAGA       |
| TBX1   | CISBP        | 98    | 120   | 3.75x10 <sup>-5</sup> | TCTCAGCCTTCCAAGGTGCTGGG   |
| TBX18  | CISBP        | 1,094 | 1,105 | 7.47x10 <sup>-5</sup> | GGAGGTGGAAAA              |
| TBX2   | CISBP        | 1,797 | 1,817 | 1.60x10 <sup>-7</sup> | GCACGCTGGGAAATGGAGTCC     |
| TBX20  | TRANSFA<br>C | 1,502 | 1,514 | 7.90x10 <sup>-5</sup> | AAATGCGGACAGG             |
| TBX21  | HOCOMOC<br>O | 1,587 | 1,598 | 8.93x10 <sup>-5</sup> | GGGAGTGGGAGT              |

|          |              |       |       |                       |                       |
|----------|--------------|-------|-------|-----------------------|-----------------------|
| TBX3     | hTFtarget    | 1,095 | 1,105 | 1.11x10 <sup>-5</sup> | GGAGGTGGAAA           |
| TBX4     | CISBP        | 913   | 932   | 7.65x10 <sup>-5</sup> | GGGTGAGGTGGCGCACGCCT  |
| TBX5     | TRANSFA<br>C | 1,569 | 1,583 | 2.27x10 <sup>-6</sup> | TGGGGTGCGGGCGGG       |
| TCF12    | hTFtarget    | 1,658 | 1,668 | 4.33x10 <sup>-5</sup> | CGCGCCTGCGC           |
| TCF3     | hTFtarget    | 1,658 | 1,668 | 4.76x10 <sup>-5</sup> | CGCGCCTGCGC           |
| TCF4     | hTFtarget    | 1,657 | 1,669 | 4.53x10 <sup>-5</sup> | CCGCGCCTGCGCC         |
| TCF7     | hTFtarget    | 327   | 342   | 1.42x10 <sup>-5</sup> | AACAAGATCACAGACA      |
| TCF7L1   | CISBP        | 2,244 | 2,258 | 7.79x10 <sup>-5</sup> | GGCTCGGGGCGGAGA       |
| TCF7L2   | HOCOMOC<br>O | 328   | 340   | 8.97x10 <sup>-5</sup> | GTCTGTGATCTTG         |
| TCFCP2L1 | CISBP        | 138   | 158   | 4.17x10 <sup>-5</sup> | CTGCATCCGGCCAGTTTTATT |
| TCFL5    | CISBP        | 1,707 | 1,716 | 5.03x10 <sup>-7</sup> | GCACGCGCAC            |
| TEAD1    | hTFtarget    | 388   | 400   | 6.34x10 <sup>-5</sup> | CTACACTCCAGCC         |
| TEAD2    | CISBP        | 612   | 621   | 5.40x10 <sup>-5</sup> | CCTGGAATCC            |
| TEAD4    | CISBP        | 612   | 621   | 2.22x10 <sup>-5</sup> | CCTGGAATCC            |
| TFAP2A   | CISBP        | 1,891 | 1,900 | 1.83x10 <sup>-6</sup> | CGCCTCAGGG            |
| TFAP2B   | hTFtarget    | 1,891 | 1,901 | 1.25x10 <sup>-6</sup> | TCCCTGAGGCG           |

|         |              |       |       |                        |                        |
|---------|--------------|-------|-------|------------------------|------------------------|
| TFAP2C  | hTFtarget    | 1,889 | 1,902 | 1.22x10 <sup>-6</sup>  | GTCCCTGAGGCGGA         |
| TFAP2E  | CISBP        | 1,815 | 1,826 | 1.06x10 <sup>-6</sup>  | TGCCGCGGGGCA           |
| TFAP4   | hTFtarget    | 1,061 | 1,070 | 9.38x10 <sup>-5</sup>  | AACAGGTGAC             |
| TFCP2   | hTFtarget    | 1,086 | 1,095 | 2.18x10 <sup>-5</sup>  | AAACCGGTCT             |
| TFCP2L1 | HOCOMOC<br>O | 2,322 | 2,340 | 6.27x10 <sup>-5</sup>  | GTCCGCCCCCGGCCGGCGT    |
| TFDP1   | hTFtarget    | 2,131 | 2,144 | 7.95x10 <sup>-6</sup>  | CGGAGGCGGGAGCG         |
| TFE3    | CISBP        | 575   | 584   | 1.21x10 <sup>-5</sup>  | CCTCGTGATC             |
| TFEB    | hTFtarget    | 1,537 | 1,546 | 2.25x10 <sup>-5</sup>  | CTCACGTGCC             |
| TFEC    | CISBP        | 575   | 584   | 1.56x10 <sup>-5</sup>  | CCTCGTGATC             |
| TGIF1   | CISBP        | 988   | 997   | 7.35x10 <sup>-6</sup>  | ATTGACAGCC             |
| TGIF2   | CISBP        | 988   | 997   | 2.79x10 <sup>-5</sup>  | ATTGACAGCC             |
| THAP1   | hTFtarget    | 2,037 | 2,058 | 1.56x10 <sup>-7</sup>  | CGCCGCCGCCGCCGCCGCCGCC |
| THAP11  | HOCOMOC<br>O | 1,797 | 1,818 | 4.19x10 <sup>-10</sup> | GGCACGCTGGGAAATGGAGTCC |
| THRA    | hTFtarget    | 870   | 886   | 5.27x10 <sup>-6</sup>  | GGATCAATTTAGGTCAG      |
| THRB    | hTFtarget    | 2,305 | 2,323 | 2.65x10 <sup>-6</sup>  | GTGACCTTGACGGGGCGGC    |
| TLX2    | CISBP        | 951   | 958   | 6.46x10 <sup>-5</sup>  | ATTAAATA               |

|        |              |       |       |                       |                        |
|--------|--------------|-------|-------|-----------------------|------------------------|
| TP53   | hTFtarget    | 1,175 | 1,194 | 2.82x10 <sup>-6</sup> | GGTCCAGACCAGACATGCCG   |
| TP63   | hTFtarget    | 1,175 | 1,194 | 1.77x10 <sup>-6</sup> | GGTCCAGACCAGACATGCCG   |
| TP73   | hTFtarget    | 1,176 | 1,194 | 4.50x10 <sup>-7</sup> | GGTCCAGACCAGACATGCC    |
| TRP53  | CISBP        | 1,954 | 1,971 | 8.28x10 <sup>-5</sup> | AGCGCGCCCGGGCGTGCG     |
| TRP73  | TRANSFA<br>C | 1,176 | 1,193 | 6.33x10 <sup>-5</sup> | GGCATGTCTGGTCTGGAC     |
| TWIST1 | hTFtarget    | 1,302 | 1,318 | 8.76x10 <sup>-5</sup> | ACTGATGTATGCAATTA      |
| UBP1   | hTFtarget    | 2,323 | 2,340 | 6.54x10 <sup>-5</sup> | CGCCGGCCGGGGGCGGAC     |
| USF1   | hTFtarget    | 1,538 | 1,547 | 1.74x10 <sup>-5</sup> | TCACGTGCCG             |
| USF2   | HOCOMOC<br>O | 1,530 | 1,548 | 7.61x10 <sup>-6</sup> | ACGGCACGTGAGCGTCCCG    |
| VDR    | JASPAR       | 1,441 | 1,456 | 2.10x10 <sup>-6</sup> | AAGGTCACCCAGTTCG       |
| VENTX  | CISBP        | 1,311 | 1,320 | 5.84x10 <sup>-5</sup> | GTTAATTGCA             |
| VEZF1  | hTFtarget    | 2,130 | 2,151 | 1.23x10 <sup>-6</sup> | CCGGAGGCGGGAGCGAGCGAGG |
| VSX2   | hTFtarget    | 506   | 514   | 6.89x10 <sup>-5</sup> | GCTAATTTT              |
| WT1    | hTFtarget    | 1,969 | 1,988 | 8.81x10 <sup>-7</sup> | GCGCAGGGGCGGCGGCGCGG   |
| XBP1   | hTFtarget    | 920   | 931   | 6.21x10 <sup>-7</sup> | CGCCACCTCACC           |
| XPA    | CISBP        | 922   | 932   | 4.75x10 <sup>-7</sup> | GGGTGAGGTGG            |

|        |              |       |       |                        |                       |
|--------|--------------|-------|-------|------------------------|-----------------------|
| YY1    | hTFtarget    | 2,183 | 2,193 | 1.84x10 <sup>-5</sup>  | GCCGCCATGAA           |
| YY2    | hTFtarget    | 2,182 | 2,192 | 1.93x10 <sup>-6</sup>  | TCATGGCGGCG           |
| ZBTB1  | CISBP        | 1,946 | 1,955 | 2.43x10 <sup>-5</sup>  | CTCCCGCACG            |
| ZBTB12 | CISBP        | 2,086 | 2,099 | 4.77x10 <sup>-5</sup>  | ATCCGGGCCGCGGC        |
| ZBTB14 | hTFtarget    | 1727  | 1742  | 1.11x10 <sup>-7</sup>  | ACGCGCGCGCACGCAC      |
| ZBTB17 | HOCOMOC<br>O | 2,480 | 2,498 | 3.58x10 <sup>-7</sup>  | GGAGGCGGCGGGGGGCC     |
| ZBTB18 | hTFtarget    | 1,657 | 1,668 | 9.43x10 <sup>-5</sup>  | GCGCAGGCGCGG          |
| ZBTB20 | TRANSFA<br>C | 2,317 | 2,328 | 7.64x10 <sup>-5</sup>  | AGGTCACGCCGG          |
| ZBTB22 | CISBP        | 1,216 | 1,232 | 8.18x10 <sup>-5</sup>  | GTCACAACCTTGAGTGCG    |
| ZBTB24 | TRANSFA<br>C | 669   | 680   | 1.61x10 <sup>-5</sup>  | CTGGGCAACAGA          |
| ZBTB26 | CISBP        | 1,726 | 1,746 | 6.57x10 <sup>-12</sup> | CACGCGCGCGCACGCACGCAC |
| ZBTB3  | TRANSFA<br>C | 1,153 | 1,169 | 5.10x10 <sup>-6</sup>  | GTGTGCACTGCAGGGTG     |
| ZBTB33 | hTFtarget    | 1,523 | 1,537 | 1.06x10 <sup>-5</sup>  | GCGTCCCGCGCGAGG       |
| ZBTB37 | CISBP        | 2,172 | 2,188 | 3.45x10 <sup>-6</sup>  | TCGCCGCCGCCGCCGCC     |

|        |              |       |       |                       |                       |
|--------|--------------|-------|-------|-----------------------|-----------------------|
| ZBTB41 | TRANSFA<br>C | 2,370 | 2,380 | 4.51x10 <sup>-6</sup> | AGGGCCCCCGG           |
| ZBTB43 | CISBP        | 1,673 | 1,692 | 2.18x10 <sup>-5</sup> | AGTGCCTAGCCCGGAGCGCC  |
| ZBTB44 | CISBP        | 136   | 146   | 7.86x10 <sup>-5</sup> | CGGATGCAGTG           |
| ZBTB5  | TRANSFA<br>C | 1,101 | 1,110 | 1.20x10 <sup>-5</sup> | CAGAAGGAGG            |
| ZBTB6  | hTFtarget    | 2,108 | 2,122 | 1.22x10 <sup>-6</sup> | CCCGCTCCGTCGCCC       |
| ZBTB7A | hTFtarget    | 2,367 | 2,381 | 2.67x10 <sup>-6</sup> | CAGGGCCCCCGGCGC       |
| ZBTB7B | TRANSFA<br>C | 1,136 | 1,150 | 1.80x10 <sup>-6</sup> | CGACCCCCCAAAAAG       |
| ZBTB7C | CISBP        | 779   | 790   | 9.65x10 <sup>-6</sup> | GCGCCCACCACC          |
| ZEB1   | CISBP        | 1,062 | 1,069 | 1.47x10 <sup>-5</sup> | TCACCTGT              |
| ZFP1   | TRANSFA<br>C | 298   | 316   | 5.45x10 <sup>-5</sup> | TAAAAGAAAAAAAAAAGTGTT |
| ZFP105 | TRANSFA<br>C | 19    | 33    | 1.51x10 <sup>-5</sup> | TACAAAAATAATAA        |
| ZFP14  | CISBP        | 2,150 | 2,164 | 1.78x10 <sup>-8</sup> | CGCTCCCGGGCCTCC       |
| ZFP182 | TRANSFA      | 806   | 817   | 3.28x10 <sup>-5</sup> | AAATACAAAAGA          |

|        |              |       |       |                       |                     |
|--------|--------------|-------|-------|-----------------------|---------------------|
|        | C            |       |       |                       |                     |
| ZFP184 | TRANSFA<br>C | 2,028 | 2,039 | 4.53x10 <sup>-6</sup> | GGAGGCAGCCGC        |
| ZFP202 | CISBP        | 1,365 | 1,374 | 2.83x10 <sup>-5</sup> | CCCCCCCCCA          |
| ZFP260 | TRANSFA<br>C | 1,373 | 1,384 | 3.66x10 <sup>-5</sup> | GGGTCAATAATA        |
| ZFP28  | HOCOMOC<br>O | 288   | 307   | 1.06x10 <sup>-5</sup> | TTTTCTTTATTTTGAGACA |
| ZFP281 | TRANSFA<br>C | 1,364 | 1,378 | 1.05x10 <sup>-6</sup> | TGACCCCCCCCCCAA     |
| ZFP287 | TRANSFA<br>C | 1,373 | 1,384 | 3.97x10 <sup>-5</sup> | GGGTCAATAATA        |
| ZFP3   | TRANSFA<br>C | 645   | 656   | 1.89x10 <sup>-5</sup> | CTTAGAAAAAAAA       |
| ZFP30  | TRANSFA<br>C | 1,040 | 1,051 | 3.70x10 <sup>-7</sup> | CGGTTTACAAA         |
| ZFP316 | TRANSFA<br>C | 1,506 | 1,517 | 7.06x10 <sup>-5</sup> | GCGGACAGGGGA        |
| ZFP319 | TRANSFA      | 534   | 545   | 1.46x10 <sup>-5</sup> | TGGTGAAACCCC        |

|        |              |       |       |                       |                     |
|--------|--------------|-------|-------|-----------------------|---------------------|
|        | C            |       |       |                       |                     |
| ZFP329 | TRANSFA<br>C | 440   | 458   | 2.79x10 <sup>-5</sup> | GGCAGTAGAATTGCTTGAA |
| ZFP37  | TRANSFA<br>C | 990   | 1001  | 3.18x10 <sup>-5</sup> | CTGTCAATGTGC        |
| ZFP39  | TRANSFA<br>C | 596   | 607   | 1.43x10 <sup>-5</sup> | AGTTTGGGAGGC        |
| ZFP414 | TRANSFA<br>C | 998   | 1010  | 7.13x10 <sup>-5</sup> | AATCTCACAGCAC       |
| ZFP42  | HOCOMOC<br>O | 1,797 | 1,808 | 3.07x10 <sup>-5</sup> | GGACTCCATTTC        |
| ZFP445 | TRANSFA<br>C | 768   | 785   | 2.16x10 <sup>-6</sup> | TGGGATTACAGGCGCCCA  |
| ZFP46  | TRANSFA<br>C | 583   | 594   | 3.36x10 <sup>-6</sup> | AAGGTGGGCGGA        |
| ZFP513 | TRANSFA<br>C | 187   | 204   | 2.57x10 <sup>-6</sup> | GGGAGGCTGAGGAGGGAG  |
| ZFP516 | TRANSFA<br>C | 141   | 147   | 8.00x10 <sup>-5</sup> | CCGGATG             |

|        |              |       |       |                       |                       |
|--------|--------------|-------|-------|-----------------------|-----------------------|
| ZFP526 | TRANSFA<br>C | 679   | 690   | 2.44x10 <sup>-5</sup> | AGGTTGGTGTGC          |
| ZFP532 | TRANSFA<br>C | 2,445 | 2,452 | 7.28x10 <sup>-5</sup> | TGGGGGAT              |
| ZFP536 | TRANSFA<br>C | 2,130 | 2,136 | 3.60x10 <sup>-5</sup> | CCGGAGG               |
| ZFP553 | TRANSFA<br>C | 2,333 | 2,342 | 1.39x10 <sup>-5</sup> | GGGCGGACTC            |
| ZFP57  | HOCOMOC<br>O | 1,819 | 1,828 | 1.37x10 <sup>-5</sup> | CCGCGGCAAC            |
| ZFP574 | TRANSFA<br>C | 1,585 | 1,605 | 5.15x10 <sup>-5</sup> | CGCTGCGGGGAGTGGGAGTGT |
| ZFP579 | TRANSFA<br>C | 2,396 | 2,406 | 3.65x10 <sup>-7</sup> | CCCCCCCAGAC           |
| ZFP583 | TRANSFA<br>C | 1,087 | 1,106 | 9.16x10 <sup>-6</sup> | AGGAGGTGGAAAAACCGGTC  |
| ZFP629 | TRANSFA<br>C | 76    | 87    | 7.33x10 <sup>-5</sup> | CTGGGCTCAAGC          |
| ZFP637 | CISBP        | 839   | 847   | 2.34x10 <sup>-5</sup> | TATATATGT             |

|        |              |       |       |                       |                  |
|--------|--------------|-------|-------|-----------------------|------------------|
| ZFP64  | CISBP        | 2,295 | 2,309 | 1.55x10 <sup>-6</sup> | GCCCCCGGGGCCGC   |
| ZFP641 | TRANSFA<br>C | 1,364 | 1,375 | 1.06x10 <sup>-6</sup> | TTGGGGGGGGGG     |
| ZFP652 | TRANSFA<br>C | 1,631 | 1,643 | 1.52x10 <sup>-5</sup> | GTGAAGAGTTAAA    |
| ZFP653 | TRANSFA<br>C | 1,363 | 1,372 | 2.81x10 <sup>-5</sup> | CTTGGGGGGG       |
| ZFP654 | TRANSFA<br>C | 26    | 41    | 2.50x10 <sup>-5</sup> | TTTTTGTAGAGATGGG |
| ZFP664 | TRANSFA<br>C | 534   | 545   | 8.96x10 <sup>-5</sup> | TGGTGAAACCCC     |
| ZFP668 | TRANSFA<br>C | 2,473 | 2,486 | 6.95x10 <sup>-5</sup> | GTCCGGGGGGCCCC   |
| ZFP672 | TRANSFA<br>C | 111   | 122   | 6.19x10 <sup>-6</sup> | AGGTGCTGGGAT     |
| ZFP689 | TRANSFA<br>C | 2,119 | 2,130 | 8.12x10 <sup>-5</sup> | CGGGTGACCTTC     |
| ZFP697 | TRANSFA<br>C | 2,471 | 2,482 | 1.12x10 <sup>-5</sup> | GGGTCCGGGGGG     |

|        |              |       |       |                       |                       |
|--------|--------------|-------|-------|-----------------------|-----------------------|
| ZFP711 | CISBP        | 2,478 | 2,487 | 1.84x10 <sup>-6</sup> | GGGGGCCCCCG           |
| ZFP74  | TRANSFA<br>C | 346   | 364   | 8.49x10 <sup>-5</sup> | CTCAAAAAAAAAAAAAATACA |
| ZFP740 | TRANSFA<br>C | 1,361 | 1,376 | 1.98x10 <sup>-7</sup> | ACCCCCCCCCCAAGTG      |
| ZFP768 | TRANSFA<br>C | 2,071 | 2,082 | 8.13x10 <sup>-5</sup> | CGCAACGGCGGC          |
| ZFP770 | TRANSFA<br>C | 1,367 | 1,376 | 1.03x10 <sup>-5</sup> | GGGGGGGGGT            |
| ZFP786 | TRANSFA<br>C | 2,007 | 2,024 | 7.39x10 <sup>-5</sup> | CCTCGGCGCCAACGGTCA    |
| ZFP787 | TRANSFA<br>C | 1,488 | 1,499 | 1.05x10 <sup>-5</sup> | CAGAAGAGGATC          |
| ZFP800 | TRANSFA<br>C | 160   | 167   | 9.01x10 <sup>-5</sup> | TAAATGGG              |
| ZFP90  | TRANSFA<br>C | 2,205 | 2,223 | 7.74x10 <sup>-5</sup> | CCGACGAGATCGGGTGAGG   |
| ZFP92  | TRANSFA<br>C | 2,331 | 2,342 | 2.52x10 <sup>-6</sup> | GGGGGCGGACTC          |

|         |              |       |       |                       |                                    |
|---------|--------------|-------|-------|-----------------------|------------------------------------|
| ZFX     | HOCOMOC<br>O | 2,277 | 2,295 | 2.00x10 <sup>-6</sup> | CGCCCGGCCTCAGACGCCG                |
| ZIC1    | TRANSFA<br>C | 2,294 | 2,307 | 2.41x10 <sup>-6</sup> | GGCCCCGGGGGGCG                     |
| ZIC2    | TRANSFA<br>C | 2,295 | 2,309 | 6.21x10 <sup>-6</sup> | GCCCCCGGGGCCGC                     |
| ZIC3    | hTFtarget    | 1,592 | 1,606 | 2.56x10 <sup>-6</sup> | CACTCCCCGCAGCGC                    |
| ZIC4    | CISBP        | 1,592 | 1,606 | 1.62x10 <sup>-6</sup> | CACTCCCCGCAGCGC                    |
| ZIC5    | CISBP        | 2,475 | 2,484 | 1.17x10 <sup>-6</sup> | GGCCCCCGG                          |
| ZIK1    | CISBP        | 1,275 | 1,295 | 1.10x10 <sup>-5</sup> | TCTTCTGGGTGACTTTGCCCC              |
| ZIM2    | CISBP        | 1,546 | 1,575 | 1.38x10 <sup>-8</sup> | CGTTCCCGCTCCGTCCGCCCGCCTG<br>GGGTG |
| ZKSCAN1 | CISBP        | 1,709 | 1,718 | 3.82x10 <sup>-5</sup> | ACGCGCACGC                         |
| ZKSCAN3 | JASPAR       | 844   | 863   | 2.38x10 <sup>-5</sup> | GAGACCAGCCTAGCCAACAT               |
| ZKSCAN5 | JASPAR       | 1,095 | 1,108 | 6.69x10 <sup>-5</sup> | GAAGGAGGTGGAAA                     |
| ZNF100  | CISBP        | 2,036 | 2,050 | 7.42x10 <sup>-9</sup> | CCGCCGCCGCCGCCG                    |
| ZNF101  | CISBP        | 1,967 | 1,981 | 3.92x10 <sup>-5</sup> | GTGCGCAGGGGCGGC                    |
| ZNF12   | CISBP        | 2,093 | 2,110 | 5.84x10 <sup>-7</sup> | CCCTCCCCACAGCCGCGG                 |

|        |              |       |       |                        |                          |
|--------|--------------|-------|-------|------------------------|--------------------------|
| ZNF121 | HOCOMOC<br>O | 661   | 680   | 1.85x10 <sup>-11</sup> | CTGGGCAACAGAGCAAGACT     |
| ZNF124 | CISBP        | 1,847 | 1,858 | 6.33x10 <sup>-5</sup>  | CGTTTTTCCTTTC            |
| ZNF132 | CISBP        | 2,425 | 2,439 | 6.69x10 <sup>-6</sup>  | CGCTTCCCGGCTTCC          |
| ZNF135 | JASPAR       | 885   | 898   | 2.30x10 <sup>-7</sup>  | CCTCGGCCTCCCAA           |
| ZNF136 | CISBP        | 354   | 374   | 2.34x10 <sup>-5</sup>  | TTTTTTTTGAGACAGAGTCTT    |
| ZNF140 | JASPAR       | 439   | 459   | 1.42x10 <sup>-6</sup>  | AGGCAGTAGAATTGCTTGAAC    |
| ZNF141 | CISBP        | 2,301 | 2,324 | 2.32x10 <sup>-6</sup>  | CGTGACCTTGACGGGGCGGCCCCG |
| ZNF143 | HOCOMOC<br>O | 1,797 | 1,818 | 1.16x10 <sup>-10</sup> | GGCACGCTGGGAAATGGAGTCC   |
| ZNF146 | HOCOMOC<br>O | 1,330 | 1,353 | 2.52x10 <sup>-5</sup>  | TATTAATAGCCAAATACTGTTTTA |
| ZNF148 | hTFtarget    | 2,264 | 2,275 | 9.78x10 <sup>-6</sup>  | CGCCGCTCCCCG             |
| ZNF154 | CISBP        | 214   | 228   | 8.98x10 <sup>-5</sup>  | AGTCCAGGAGTTCAA          |
| ZNF16  | CISBP        | 2,372 | 2,386 | 5.29x10 <sup>-5</sup>  | CCGTCCAGGGCCCCC          |
| ZNF174 | CISBP        | 1,532 | 1,547 | 2.33x10 <sup>-5</sup>  | GGACGCTCACGTGCCG         |
| ZNF175 | CISBP        | 14    | 34    | 2.30x10 <sup>-5</sup>  | TATTATTATTATTTTTGTAG     |
| ZNF18  | CISBP        | 684   | 698   | 3.43x10 <sup>-5</sup>  | GGTGTGCAGTGGCGC          |

|        |        |       |       |                       |                                              |
|--------|--------|-------|-------|-----------------------|----------------------------------------------|
| ZNF180 | CISBP  | 2,036 | 2,056 | 1.12x10 <sup>-7</sup> | CCGCCGCCGCCGCCGCCGCCG                        |
| ZNF181 | CISBP  | 174   | 197   | 2.11x10 <sup>-9</sup> | GTCCCAGCTACTTGGGAGGCTGAG                     |
| ZNF182 | CISBP  | 350   | 361   | 5.90x10 <sup>-6</sup> | TTTTTTTTTTTT                                 |
| ZNF189 | CISBP  | 1,536 | 1,553 | 3.18x10 <sup>-6</sup> | CGGGAACGGCACGTGAGC                           |
| ZNF19  | CISBP  | 2,373 | 2,390 | 1.56x10 <sup>-5</sup> | GCACCCGTCCAGGGCCCC                           |
| ZNF2   | CISBP  | 2,411 | 2,419 | 1.11x10 <sup>-5</sup> | GGCGCCCC                                     |
| ZNF200 | CISBP  | 2,126 | 2,137 | 7.30x10 <sup>-5</sup> | CCTTCCGGAGGC                                 |
| ZNF202 | CISBP  | 2,132 | 2,139 | 1.63x10 <sup>-5</sup> | CCGCCTCC                                     |
| ZNF212 | CISBP  | 275   | 304   | 5.12x10 <sup>-5</sup> | TCTTTTATTTTGAGACAGGCTCTCA<br>CTCTG           |
| ZNF213 | CISBP  | 2,274 | 2,288 | 1.00x10 <sup>-5</sup> | CGCCGCCCGGCCTCA                              |
| ZNF214 | JASPAR | 987   | 1,001 | 7.95x10 <sup>-5</sup> | GCACATTGACAGCCT                              |
| ZNF22  | CISBP  | 350   | 358   | 8.86x10 <sup>-6</sup> | TTTTTTTTTT                                   |
| ZNF222 | CISBP  | 1,110 | 1,118 | 1.06x10 <sup>-5</sup> | GCTGACATT                                    |
| ZNF223 | CISBP  | 1,102 | 1,115 | 9.27x10 <sup>-6</sup> | CTCCTTCTGCTGAC                               |
| ZNF224 | CISBP  | 52    | 87    | 1.64x10 <sup>-6</sup> | GTTGGCCAGGCTGGTCTTGA<br>ACTCC<br>TGGGCTCAAGC |
| ZNF225 | CISBP  | 333   | 360   | 7.35x10 <sup>-5</sup> | TGATCTTGTTCTTGTATTTTTTTTT                    |

|        |           |       |       |                       |                                    |
|--------|-----------|-------|-------|-----------------------|------------------------------------|
|        |           |       |       |                       | TT                                 |
| ZNF23  | CISBP     | 1,779 | 1,797 | 6.40x10 <sup>-6</sup> | CCTGCGCTGGCCCCGCCCC                |
| ZNF235 | CISBP     | 1     | 30    | 1.05x10 <sup>-7</sup> | TTTGTATTATTATTATTATTATT<br>TTTT    |
| ZNF248 | CISBP     | 1,386 | 1,406 | 8.74x10 <sup>-5</sup> | CTTTTCATAGTCATTGAATTT              |
| ZNF25  | CISBP     | 1,388 | 1,416 | 8.99x10 <sup>-5</sup> | TTTCATAGTCATTGAATTTAGTTAA<br>TTGT  |
| ZNF250 | hTFtarget | 1,772 | 1,780 | 8.74x10 <sup>-6</sup> | CCTTGCAGG                          |
| ZNF254 | CISBP     | 184   | 195   | 4.82x10 <sup>-5</sup> | CTTGGGAGGCTG                       |
| ZNF257 | JASPAR    | 2,131 | 2,142 | 7.18x10 <sup>-6</sup> | CGGAGGCGGGAG                       |
| ZNF260 | CISBP     | 2,105 | 2,119 | 8.50x10 <sup>-7</sup> | GCTCCGTCGCCCTCC                    |
| ZNF263 | hTFtarget | 2,021 | 2,032 | 2.47x10 <sup>-7</sup> | GAGGGGAGGAGG                       |
| ZNF264 | CISBP     | 2,281 | 2,310 | 6.83x10 <sup>-5</sup> | GGCGGCCCCGGGGGGCGGCGTCTG<br>AGGCCG |
| ZNF267 | CISBP     | 1,957 | 1,977 | 2.17x10 <sup>-7</sup> | CCCCTGCGCACGCCCGGGCGC              |
| ZNF273 | CISBP     | 1,649 | 1,665 | 8.95x10 <sup>-5</sup> | AGCGGCAGCCGCGCCTG                  |
| ZNF274 | hTFtarget | 1,285 | 1,304 | 9.34x10 <sup>-5</sup> | CACCCAGAAGAAGAACCACT               |
| ZNF28  | CISBP     | 2,410 | 2,427 | 9.83x10 <sup>-7</sup> | TGGCGCCCCCGCCGCCGC                 |

|        |              |       |       |                        |                                        |
|--------|--------------|-------|-------|------------------------|----------------------------------------|
| ZNF281 | hTFtarget    | 1,927 | 1,938 | 5.39x10 <sup>-6</sup>  | GACCCGCCCCCG                           |
| ZNF282 | CISBP        | 1,587 | 1,600 | 1.12x10 <sup>-5</sup>  | ACTCCCACTCCCCG                         |
| ZNF283 | CISBP        | 2,249 | 2,272 | 9.02x10 <sup>-7</sup>  | GCCCCGAGCCCGGCCCGCCGCTCC               |
| ZNF284 | CISBP        | 696   | 704   | 1.74x10 <sup>-5</sup>  | CGCGATCTC                              |
| ZNF287 | CISBP        | 327   | 359   | 5.97x10 <sup>-8</sup>  | TGTCTGTGATCTTGTTTCCTTGTATTT<br>TTTTTTT |
| ZNF30  | CISBP        | 2,033 | 2,047 | 2.70x10 <sup>-8</sup>  | CAGCCGCCGCCGCCG                        |
| ZNF300 | CISBP        | 2,254 | 2,282 | 1.18x10 <sup>-5</sup>  | GAGCCCGGCCCGCCGCTCCCCGCC<br>GCCCCG     |
| ZNF304 | CISBP        | 1,861 | 1,884 | 4.69x10 <sup>-7</sup>  | GCGCCGCCG CAGTCGGGGCCGTCG              |
| ZNF311 | CISBP        | 2,032 | 2,052 | 2.25x10 <sup>-10</sup> | GCAGCCGCCGCCGCCGCCGCC                  |
| ZNF317 | JASPAR       | 1,105 | 1,116 | 3.61x10 <sup>-5</sup>  | TGTCAGCAGAAG                           |
| ZNF320 | CISBP        | 2,471 | 2,491 | 9.31x10 <sup>-7</sup>  | GCGGCGGGGCCCCCGGACCC                   |
| ZNF322 | CISBP        | 2,235 | 2,255 | 3.73x10 <sup>-6</sup>  | GGGCCTGCGTCTCCGCCCCGA                  |
| ZNF324 | HOCOMOC<br>O | 80    | 102   | 3.03x10 <sup>-6</sup>  | GCTCAAGCGATCCTCTCATCTCA                |
| ZNF329 | CISBP        | 2,436 | 2,456 | 2.43x10 <sup>-5</sup>  | CAGGATCCCCCAGGACGGGAA                  |
| ZNF331 | JASPAR       | 1,154 | 1,167 | 2.72x10 <sup>-5</sup>  | CCCTGCAGTGCACA                         |

|         |           |       |       |                       |                                    |
|---------|-----------|-------|-------|-----------------------|------------------------------------|
| ZNF333  | hTFtarget | 1,614 | 1,622 | 7.18x10 <sup>-6</sup> | GGCTCCACC                          |
| ZNF343  | CISBP     | 2,425 | 2,433 | 6.69x10 <sup>-6</sup> | CGCTTCCCG                          |
| ZNF345  | CISBP     | 666   | 687   | 2.41x10 <sup>-5</sup> | TGCTCTGTTGCCCAGGTTGGTG             |
| ZNF35   | CISBP     | 24    | 53    | 2.42x10 <sup>-5</sup> | ATTTTTTGTAGAGATGGGGTTTTGT<br>CATGT |
| ZNF350  | hTFtarget | 638   | 655   | 1.71x10 <sup>-6</sup> | CGGCCCTTTTTTTTCTAA                 |
| ZNF354A | JASPAR    | 291   | 311   | 6.91x10 <sup>-5</sup> | CTCAAAATAAAAGAAAAAAAAA             |
| ZNF354B | CISBP     | 948   | 959   | 2.08x10 <sup>-5</sup> | ATTTATTTAATT                       |
| ZNF37A  | CISBP     | 197   | 205   | 2.23x10 <sup>-6</sup> | CCTCCCTCC                          |
| ZNF383  | CISBP     | 2,418 | 2,444 | 3.85x10 <sup>-6</sup> | CCGCCGCCGCTTCCCGGCTTCCCGT<br>CC    |
| ZNF384  | hTFtarget | 352   | 363   | 1.85x10 <sup>-6</sup> | TCAAAAAAAAAA                       |
| ZNF394  | CISBP     | 2,232 | 2,251 | 1.68x10 <sup>-5</sup> | CGCGGGCCTGCGTCTCCGCC               |
| ZNF398  | CISBP     | 2,022 | 2,035 | 2.14x10 <sup>-5</sup> | CTGCCTCCTCCCCT                     |
| ZNF41   | CISBP     | 619   | 633   | 1.19x10 <sup>-6</sup> | TGGTGGCTCACTCCT                    |
| ZNF415  | CISBP     | 2,108 | 2,122 | 2.27x10 <sup>-6</sup> | CCCGCTCCGTCGCCC                    |
| ZNF416  | JASPAR    | 673   | 683   | 4.74x10 <sup>-5</sup> | AACCTGGGCAA                        |
| ZNF417  | CISBP     | 2,013 | 2,033 | 4.83x10 <sup>-6</sup> | TTGGCGCCGAGGGGAGGAGGC              |

|        |              |       |       |                       |                                     |
|--------|--------------|-------|-------|-----------------------|-------------------------------------|
| ZNF418 | CISBP        | 3     | 32    | 4.34x10 <sup>-6</sup> | ACAAAAAATAATAATAATAATAAT<br>AATACA  |
| ZNF419 | CISBP        | 1,915 | 1,935 | 7.77x10 <sup>-5</sup> | GGAGTACCCCTGGACCCGCC                |
| ZNF425 | CISBP        | 2,106 | 2,112 | 7.21x10 <sup>-5</sup> | CGCCCTC                             |
| ZNF430 | CISBP        | 488   | 505   | 2.81x10 <sup>-5</sup> | TCGGCATGGTGGCAGGCG                  |
| ZNF432 | CISBP        | 1,537 | 1,566 | 2.53x10 <sup>-5</sup> | CTCACGTGCCGTTCCCGCTCCGTCC<br>GCCCCG |
| ZNF436 | HOCOMOC<br>O | 1,890 | 1,913 | 6.11x10 <sup>-6</sup> | TCTGTGCGTGCGTCCCTGAGGCGG            |
| ZNF44  | CISBP        | 2,080 | 2,109 | 1.18x10 <sup>-7</sup> | CCTCCCCACAGCCGCGGCCCGGAT<br>CTGCGC  |
| ZNF440 | CISBP        | 1,290 | 1,304 | 5.60x10 <sup>-6</sup> | AGTGGTTCTTCTTCT                     |
| ZNF441 | CISBP        | 1,778 | 1,789 | 2.34x10 <sup>-6</sup> | GGCCCCGCCCT                         |
| ZNF443 | CISBP        | 103   | 123   | 4.75x10 <sup>-9</sup> | GCCTTCCAAGGTGCTGGGATT               |
| ZNF444 | CISBP        | 2,101 | 2,116 | 2.06x10 <sup>-6</sup> | CCGTCGCCCTCCCCAC                    |
| ZNF445 | CISBP        | 533   | 561   | 8.66x10 <sup>-5</sup> | ACCATCCTGGCTAACATGGTGAAA<br>CCCCG   |
| ZNF449 | CISBP        | 1,728 | 1,742 | 7.63x10 <sup>-6</sup> | GTGCGTGCGCGCGCG                     |

|        |              |       |       |                        |                                    |
|--------|--------------|-------|-------|------------------------|------------------------------------|
| ZNF454 | JASPAR       | 1,470 | 1,487 | 8.99x10 <sup>-7</sup>  | AGCCTCTCGGACCCTCGG                 |
| ZNF460 | JASPAR       | 456   | 471   | 1.54x10 <sup>-8</sup>  | GCCTCAGCCTCCTGAG                   |
| ZNF467 | HOCOMOC<br>O | 2,103 | 2,124 | 4.49x10 <sup>-7</sup>  | GGGGAGGGCGACGGAGCGGGTG             |
| ZNF480 | CISBP        | 1,588 | 1,599 | 8.32x10 <sup>-5</sup>  | CTCCCACTCCCC                       |
| ZNF484 | CISBP        | 2,021 | 2,041 | 2.96x10 <sup>-5</sup>  | CGGCGGCTGCCTCCTCCCCTC              |
| ZNF486 | CISBP        | 1,960 | 1,972 | 5.46x10 <sup>-6</sup>  | GCGCACGCCCGGG                      |
| ZNF487 | CISBP        | 333   | 361   | 6.88x10 <sup>-6</sup>  | AAAAAAAAAAAAATACAAGGAACA<br>AGATCA |
| ZNF490 | CISBP        | 1,201 | 1,215 | 3.45x10 <sup>-6</sup>  | GGGTGCTGCTGGCAT                    |
| ZNF492 | CISBP        | 296   | 313   | 5.36x10 <sup>-6</sup>  | ACTTTTTTTTCTTTTATT                 |
| ZNF496 | CISBP        | 672   | 701   | 4.18x10 <sup>-15</sup> | ATCGCGCCACTGCACACCAACCTG<br>GGCAAC |
| ZNF501 | CISBP        | 1,704 | 1,718 | 2.58x10 <sup>-5</sup>  | CGCGCACGCGCACGC                    |
| ZNF502 | CISBP        | 124   | 150   | 1.12x10 <sup>-5</sup>  | ACAGGCATGAGCCACTGCATCCGG<br>CCA    |
| ZNF506 | CISBP        | 1,137 | 1,154 | 2.52x10 <sup>-5</sup>  | TTTTTGGGGGGTCGTCGT                 |
| ZNF513 | CISBP        | 189   | 203   | 6.79x10 <sup>-6</sup>  | TCCCTCCTCAGCCTC                    |

|        |              |       |       |                       |                                    |
|--------|--------------|-------|-------|-----------------------|------------------------------------|
| ZNF519 | CISBP        | 2,036 | 2,050 | 7.37x10 <sup>-9</sup> | CCGCCGCCGCCGCCG                    |
| ZNF524 | CISBP        | 1,475 | 1,488 | 2.82x10 <sup>-6</sup> | CTCGGACCCTCGGG                     |
| ZNF527 | CISBP        | 2,036 | 2,056 | 2.26x10 <sup>-5</sup> | CCGCCGCCGCCGCCGCCGCCG              |
| ZNF528 | HOCOMOC<br>O | 1,792 | 1,811 | 1.92x10 <sup>-6</sup> | CGCAGGGACTCCATTTCCCA               |
| ZNF529 | CISBP        | 2,252 | 2,278 | 1.19x10 <sup>-6</sup> | CCGAGCCCGGCCCGCCGCTCCCCG<br>CCG    |
| ZNF530 | CISBP        | 1,776 | 1,793 | 1.08x10 <sup>-6</sup> | CGCTGGCCCCGCCCTGC                  |
| ZNF534 | CISBP        | 1,511 | 1,525 | 7.10x10 <sup>-6</sup> | AGGCTCCTTCCCCTG                    |
| ZNF543 | CISBP        | 2,480 | 2,491 | 1.07x10 <sup>-6</sup> | GGGCCCCGCCGC                       |
| ZNF547 | HOCOMOC<br>O | 737   | 756   | 4.82x10 <sup>-5</sup> | AGCTAAGGCCGGAGAAATGC               |
| ZNF548 | CISBP        | 2,315 | 2,335 | 7.31x10 <sup>-7</sup> | CCCCCGGCCGGCGTGACCTTG              |
| ZNF549 | CISBP        | 1,019 | 1,033 | 2.44x10 <sup>-5</sup> | TGCTGCCTACTGCTT                    |
| ZNF554 | HOCOMOC<br>O | 1,602 | 1,621 | 1.37x10 <sup>-6</sup> | GTGGAGCCGCGTGGGGCGCT               |
| ZNF555 | CISBP        | 2,053 | 2,082 | 6.79x10 <sup>-7</sup> | CGCAACGGCGGCGGCGGCGGCGGC<br>GGCGGC |

|        |              |       |       |                        |                                    |
|--------|--------------|-------|-------|------------------------|------------------------------------|
| ZNF563 | CISBP        | 1,671 | 1,688 | 3.34x10 <sup>-6</sup>  | CTCCGGGCTAGGCACTGT                 |
| ZNF566 | CISBP        | 2,407 | 2,427 | 1.38x10 <sup>-6</sup>  | TCCTGGCGCCCCCGCCGCCG               |
| ZNF567 | CISBP        | 1,279 | 1,308 | 9.75x10 <sup>-7</sup>  | CATCAGTGGTTCTTCTTCTGGGTGA<br>CTTTG |
| ZNF570 | CISBP        | 800   | 820   | 3.43x10 <sup>-6</sup>  | TAATTTTCTTTTGTATTTTA               |
| ZNF571 | CISBP        | 2,036 | 2,050 | 4.38x10 <sup>-10</sup> | CCGCCGCCGCCGCCG                    |
| ZNF574 | CISBP        | 1,688 | 1,707 | 9.18x10 <sup>-5</sup>  | GCGCCGGTCTCGCAAGCGCG               |
| ZNF580 | CISBP        | 587   | 604   | 1.72x10 <sup>-5</sup>  | CCCACCTTGGCCTCCCAA                 |
| ZNF582 | CISBP        | 1,012 | 1,038 | 2.83x10 <sup>-6</sup>  | GTACGTGCTGCCTACTGCTTTTCTC<br>CT    |
| ZNF586 | HOCOMOC<br>O | 190   | 209   | 1.93x10 <sup>-5</sup>  | AGGCTGAGGAGGGAGGATAG               |
| ZNF587 | CISBP        | 1,597 | 1,620 | 5.23x10 <sup>-6</sup>  | CCCGCAGCGCCCCACGCGGCTCCA           |
| ZNF594 | CISBP        | 276   | 290   | 7.35x10 <sup>-6</sup>  | ACAGGCTCTCACTCT                    |
| ZNF596 | CISBP        | 425   | 439   | 2.23x10 <sup>-6</sup>  | GCTCTGCCTCCTGGG                    |
| ZNF605 | CISBP        | 1,274 | 1,294 | 3.78x10 <sup>-6</sup>  | CTTCTGGGTGACTTTGCCCCC              |
| ZNF610 | JASPAR       | 2,262 | 2,275 | 5.34x10 <sup>-9</sup>  | CCCGCCGCTCCCCG                     |
| ZNF611 | CISBP        | 2,295 | 2,312 | 7.22x10 <sup>-7</sup>  | GGGGCGGCCCCGGGGGGC                 |

|        |        |       |       |                       |                                   |
|--------|--------|-------|-------|-----------------------|-----------------------------------|
| ZNF613 | CISBP  | 304   | 312   | 7.28x10 <sup>-6</sup> | CTTTTTTTT                         |
| ZNF614 | CISBP  | 222   | 242   | 2.77x10 <sup>-5</sup> | AGCTCACTGCAGCCTTGA ACT            |
| ZNF616 | CISBP  | 2,213 | 2,227 | 1.52x10 <sup>-5</sup> | TCGTCCTCACCCGAT                   |
| ZNF619 | CISBP  | 2,124 | 2,146 | 1.84x10 <sup>-6</sup> | CTCGCTCCCGCCTCCGGAAGGTC           |
| ZNF620 | CISBP  | 939   | 967   | 3.68x10 <sup>-5</sup> | GTTCCTTGTATTTATTTAATTCTGTG<br>ATG |
| ZNF626 | CISBP  | 1,161 | 1,187 | 4.72x10 <sup>-5</sup> | ACCAGACATGCCGCTCAGCACCCCT<br>GCA  |
| ZNF641 | CISBP  | 2,399 | 2,407 | 2.23x10 <sup>-6</sup> | ACCCCCCA                          |
| ZNF652 | JASPAR | 1,632 | 1,643 | 3.02x10 <sup>-6</sup> | TGAAGAGTTAAA                      |
| ZNF662 | CISBP  | 2,131 | 2,148 | 1.76x10 <sup>-5</sup> | CGCTCGCTCCCGCCTCCG                |
| ZNF669 | CISBP  | 867   | 893   | 3.87x10 <sup>-5</sup> | AGGCCGAGGATCAATTTAGGTCAG<br>GAG   |
| ZNF674 | CISBP  | 2,407 | 2,418 | 2.16x10 <sup>-6</sup> | TCCTGGCGCCCC                      |
| ZNF675 | CISBP  | 572   | 591   | 7.11x10 <sup>-6</sup> | TGACCTCGTGATCCGCCCAC              |
| ZNF680 | JASPAR | 1,131 | 1,145 | 2.73x10 <sup>-5</sup> | CCCCAAAAGAATGA                    |
| ZNF681 | CISBP  | 1,097 | 1,108 | 5.11x10 <sup>-5</sup> | TCCACCTCCTTC                      |
| ZNF682 | CISBP  | 2,292 | 2,312 | 2.11x10 <sup>-6</sup> | GCCGCCCCCGGGGCCGCCCC              |

|        |           |       |       |                        |                         |
|--------|-----------|-------|-------|------------------------|-------------------------|
| ZNF684 | CISBP     | 1,768 | 1,776 | 1.21x10 <sup>-5</sup>  | CTCCCCTTG               |
| ZNF692 | CISBP     | 2,477 | 2,489 | 4.96x10 <sup>-6</sup>  | GGGGGGCCCCGCC           |
| ZNF701 | JASPAR    | 1,358 | 1,378 | 3.31x10 <sup>-5</sup>  | TAGCACTTGGGGGGGGGGTCA   |
| ZNF704 | CISBP     | 2,323 | 2,334 | 1.52x10 <sup>-6</sup>  | CCCCGGCCGGCG            |
| ZNF707 | JASPAR    | 614   | 628   | 2.80x10 <sup>-5</sup>  | GCTCACTCCTGGAAT         |
| ZNF708 | JASPAR    | 422   | 436   | 1.06x10 <sup>-5</sup>  | CAAGCTCTGCCTCCT         |
| ZNF71  | CISBP     | 1,542 | 1,565 | 2.25x10 <sup>-5</sup>  | GTGCCGTTCCCGCTCCGTCCGCC |
| ZNF711 | hTFtarget | 2,152 | 2,159 | 9.80x10 <sup>-5</sup>  | CCGGGCCT                |
| ZNF713 | CISBP     | 340   | 358   | 4.72x10 <sup>-6</sup>  | GTTCCTTGTATTTTTTTTT     |
| ZNF714 | CISBP     | 1,205 | 1,216 | 7.71x10 <sup>-6</sup>  | GGGGTGCTGCTG            |
| ZNF730 | CISBP     | 752   | 760   | 3.31x10 <sup>-6</sup>  | GGGAAGCTA               |
| ZNF740 | JASPAR    | 1,364 | 1,376 | 1.36x10 <sup>-6</sup>  | ACCCCCCCCCCAA           |
| ZNF749 | CISBP     | 36    | 44    | 7.55x10 <sup>-5</sup>  | AACCCCATC               |
| ZNF75A | CISBP     | 1,090 | 1,103 | 1.74x10 <sup>-5</sup>  | CGGTTTTTCCACCT          |
| ZNF75D | CISBP     | 1,090 | 1,101 | 3.06x10 <sup>-5</sup>  | GTGGAAAACCG             |
| ZNF76  | hTFtarget | 1,799 | 1,820 | 5.15x10 <sup>-11</sup> | GGGGCACGCTGGGAAATGGAGT  |
| ZNF764 | CISBP     | 215   | 235   | 4.65x10 <sup>-5</sup>  | GTCCAGGAGTTCAAGGCTGCA   |
| ZNF765 | CISBP     | 1,670 | 1,687 | 2.02x10 <sup>-6</sup>  | TCCGGGCTAGGCACTGTG      |

|         |              |       |       |                        |                                   |
|---------|--------------|-------|-------|------------------------|-----------------------------------|
| ZNF768  | HOCOMOC<br>O | 1,466 | 1,485 | 1.10x10 <sup>-6</sup>  | GAGGGTCCGAGAGGCTGAGT              |
| ZNF770  | HOCOMOC<br>O | 187   | 208   | 1.38x10 <sup>-11</sup> | GGGAGGCTGAGGAGGGAGGATA            |
| ZNF771  | CISBP        | 778   | 792   | 4.26x10 <sup>-5</sup>  | GGCGCCCACCACCAC                   |
| ZNF774  | CISBP        | 2,455 | 2,472 | 1.12x10 <sup>-7</sup>  | CCCTCAGGCTCTCCTTCA                |
| ZNF776  | CISBP        | 2,252 | 2,272 | 3.51x10 <sup>-6</sup>  | CCGAGCCCGGCCCGCCGCTCC             |
| ZNF778  | CISBP        | 2,284 | 2,298 | 9.96x10 <sup>-6</sup>  | GGGCGGCGTCTGAGG                   |
| ZNF780A | CISBP        | 718   | 741   | 5.01x10 <sup>-5</sup>  | CTCTACTTCCTGCCTTCAAGCATT          |
| ZNF783  | CISBP        | 2,091 | 2,098 | 6.67x10 <sup>-6</sup>  | CCGCGGCC                          |
| ZNF784  | CISBP        | 2,124 | 2,132 | 4.28x10 <sup>-5</sup>  | GACCTTCCG                         |
| ZNF785  | CISBP        | 1,154 | 1,182 | 3.09x10 <sup>-5</sup>  | TGTGCACTGCAGGGTGCTGAGCGG<br>CATGT |
| ZNF786  | CISBP        | 174   | 180   | 8.00x10 <sup>-5</sup>  | CTGGGAC                           |
| ZNF787  | CISBP        | 1,878 | 1,897 | 9.65x10 <sup>-6</sup>  | GCGGCGCGAAATCCGCCTCA              |
| ZNF789  | CISBP        | 488   | 499   | 9.66x10 <sup>-6</sup>  | CGCCTGCCACCA                      |
| ZNF791  | CISBP        | 1,638 | 1,661 | 3.08x10 <sup>-5</sup>  | CGCGGCTGCCGCTTCCTCTTTAAC          |
| ZNF792  | CISBP        | 1,959 | 1,988 | 4.39x10 <sup>-8</sup>  | CCGCGCCCGCCGCCCTGCGCACGC          |

|        |       |       |       |                        |                                             |
|--------|-------|-------|-------|------------------------|---------------------------------------------|
|        |       |       |       |                        | CCGGGC                                      |
| ZNF793 | CISBP | 2,160 | 2,171 | 8.68x10 <sup>-6</sup>  | GAGCGCCGAGCG                                |
| ZNF8   | CISBP | 1,033 | 1,044 | 9.31x10 <sup>-5</sup>  | ACGTACCCGGTT                                |
| ZNF805 | CISBP | 1,706 | 1,723 | 6.62x10 <sup>-5</sup>  | GGCTTGCGTGCGCGTGCG                          |
| ZNF816 | CISBP | 1,989 | 2,009 | 1.97x10 <sup>-5</sup>  | TCACCGCGCGTCCCCGCGCCG                       |
| ZNF821 | CISBP | 1,898 | 1,912 | 2.51x10 <sup>-5</sup>  | CTGTGCGTGCGTCCC                             |
| ZNF823 | CISBP | 188   | 202   | 3.09x10 <sup>-5</sup>  | CCCTCCTCAGCCTCC                             |
| ZNF84  | CISBP | 334   | 354   | 4.12x10 <sup>-5</sup>  | GATCTTGTTTCCTTGATTTTT                       |
| ZNF85  | CISBP | 603   | 620   | 2.61x10 <sup>-6</sup>  | AAACTGCTGGGATTCCAG                          |
| ZNF860 | CISBP | 2,263 | 2,277 | 6.04x10 <sup>-6</sup>  | CCGCCGCTCCCCGCC                             |
| ZNF879 | CISBP | 320   | 358   | 3.28x10 <sup>-5</sup>  | TACTATTTGTCTGTGATCTTGTCCT<br>TGTATTTTTTTTT  |
| ZNF880 | CISBP | 186   | 212   | 9.71x10 <sup>-6</sup>  | CAGCTATCCTCCCTCCTCAGCCTCC<br>CA             |
| ZNF891 | CISBP | 2,265 | 2,285 | 1.17x10 <sup>-5</sup>  | GCCGCTCCCCGCCGCCCGGCC                       |
| ZNF90  | CISBP | 576   | 590   | 5.00x10 <sup>-6</sup>  | CTCGTGATCCGCCCA                             |
| ZNF93  | CISBP | 2,035 | 2,073 | 2.30x10 <sup>-10</sup> | GCCGCCGCCGCCGCCGCCGCCGCC<br>GCCGCCGCCGCCGCC |

|         |       |       |       |                       |                      |
|---------|-------|-------|-------|-----------------------|----------------------|
| ZNF98   | CISBP | 799   | 819   | 1.89x10 <sup>-5</sup> | CTAATTTTCTTTTGTATTTT |
| ZSCAN10 | CISBP | 1,583 | 1,593 | 8.06x10 <sup>-5</sup> | GTACACTCCCA          |
| ZSCAN22 | CISBP | 2,140 | 2,157 | 1.20x10 <sup>-6</sup> | GGGCCTCCTCGCTCGCTC   |
| ZSCAN23 | CISBP | 1,309 | 1,327 | 1.84x10 <sup>-5</sup> | TGCATCTGTTAATTGCATA  |
| ZSCAN29 | CISBP | 1,031 | 1,050 | 4.47x10 <sup>-5</sup> | GCACGTACCCGGTTTTACAA |
| ZSCAN30 | CISBP | 1,829 | 1,843 | 3.19x10 <sup>-6</sup> | GCCAGGAGCCTCCGA      |
| ZSCAN31 | CISBP | 1,406 | 1,421 | 2.35x10 <sup>-6</sup> | TAGTTAATTGTTTTGA     |
| ZSCAN4C | CISBP | 684   | 692   | 2.54x10 <sup>-5</sup> | GGTGTGCAG            |
| ZSCAN5  | CISBP | 1,134 | 1,151 | 3.99x10 <sup>-5</sup> | ACGACCCCCCAAAAAGAA   |
| ZSCAN5C | CISBP | 1,892 | 1,906 | 8.05x10 <sup>-5</sup> | GCCTCAGGGACGCAC      |
